# Supplementary material
Source: publisher figshare collection journal article supplement (https://brill.figshare.com/articles/dataset/_/2413075)
Supplement: Supplementary file 1 [file 1]

Characterization of 17 novel microsatellite loci in the Nile monitor (*Varanus niloticus*)  
via 454 pyrosequencing

Jared P. Wood<sup>1</sup>, Todd S. Campbell<sup>2</sup>, Robert B. Page<sup>3</sup>

<sup>1</sup>Department of Biology, Southwestern Adventist University, Keene, Texas, 76059, USA

<sup>2</sup>Department of Biology, University of Tampa, Tampa, 401 W. Kennedy Blvd. Florida 33606, USA

<sup>3</sup>Department of Biology, College of St. Benedict & St. John's University, Collegeville, Minnesota, 56321, USA

**Supplementary Material**

**Supplementary Table S1.** Results of BLASTn searches of NCBI's 'nucleotide collection (nr/nt)' database using microsatellite containing 454 fragments as queries.

| Query          | Locus        | Best hit accession ID | Best hit description                                                     | Alignment length (bp) | % identity | Bit score | E-value               |
|----------------|--------------|-----------------------|--------------------------------------------------------------------------|-----------------------|------------|-----------|-----------------------|
| HN7TS9H02DQAES | <i>Mon1</i>  | AC154274              | <i>Mus musculus</i> BAC clone RP24-298J16 from 17, complete seq.         | 70                    | 84.0       | 73.4      | $5.0 \times 10^{-9}$  |
| HN7TS9H02ELQ4D | <i>Mon2</i>  | No significant hits   | N/A                                                                      | N/A                   | N/A        | N/A       | N/A                   |
| HN7TS9H02DEI2X | <i>Mon3</i>  | No significant hits   | N/A                                                                      | N/A                   | N/A        | N/A       | N/A                   |
| HMEZZP203GE0BW | <i>Mon4</i>  | No significant hits   | N/A                                                                      | N/A                   | N/A        | N/A       | N/A                   |
| HN7TS9H03GN69L | <i>Mon6</i>  | No significant hits   | N/A                                                                      | N/A                   | N/A        | N/A       | N/A                   |
| HMEZZP203FKADE | <i>Mon8</i>  | No significant hits   | N/A                                                                      | N/A                   | N/A        | N/A       | N/A                   |
| HMEZZP203GSD5W | <i>Mon9</i>  | No significant hits   | N/A                                                                      | N/A                   | N/A        | N/A       | N/A                   |
| HN7TS9H03GXHKZ | <i>Mon10</i> | No significant hits   | N/A                                                                      | N/A                   | N/A        | N/A       | N/A                   |
| HN7TS9H03GPPOC | <i>Mon12</i> | HQ896229              | <i>Varanus salvator</i> clone JX14 microsatellite sequence               | 185                   | 87.0       | 233.1     | $3.5 \times 10^{-54}$ |
| HN7TS9H03HA3NZ | <i>Mon13</i> | No significant hits   | N/A                                                                      | N/A                   | N/A        | N/A       | N/A                   |
| HN7TS9H02EIY13 | <i>Mon14</i> | No significant hits   | N/A                                                                      | N/A                   | N/A        | N/A       | N/A                   |
| HN7TS9H02DDL5H | <i>Mon15</i> | No significant hits   | N/A                                                                      | N/A                   | N/A        | N/A       | N/A                   |
| HN7TS9H02DPRRL | <i>Mon16</i> | CR394571*             | Zebrafish DNA seq. from clone CH211-180M12 in link. group 21             | 43                    | 100.0      | 78.8      | $8.6 \times 10^{-11}$ |
| HN7TS9H02C6YMJ | <i>Mon17</i> | LK064835              | <i>Apteryx australis mantelli</i> genome assem. AptMant0 scaffold 233    | 110                   | 85.0       | 138.0     | $8.5 \times 10^{-25}$ |
| HN7TS9H02DG8XH | <i>Mon18</i> | No significant hits   | N/A                                                                      | N/A                   | N/A        | N/A       | N/A                   |
| HN7TS9H02DDW8V | <i>Mon19</i> | JX038444              | <i>Micrurus fulvius</i> clone FQ6DGU405F3RTD microsatellite seq.         | 79                    | 87.0       | 91.5      | $2.1 \times 10^{-14}$ |
| HN7TS9H02EVHLU | <i>Mon20</i> | XM_003216189          | PREDICTED: <i>Anolis carolinensis</i> follistatin, transcript variant X1 | 127                   | 74.0       | 88.0      | $3.5 \times 10^{-11}$ |

N/A = not applicable

\* = Alignment nearly entirely corresponds to microsatellite repeat region proper and is therefore unlikely to be of biological significance

**Supplementary Data File 1:** Zip archive containing FASTA files of the 454 sequences generated during the course of our study.

**Supplementary Data File 2:** Excel spreadsheet containing the primers associated with the potentially amplifiable loci identified during the course of our study.
