# Supplementary material
Source: publisher figshare collection journal article supplement (https://brill.figshare.com/articles/dataset/_/2413075)
Supplement: Supplementary file 1 [file 1]

## Sheet: Wood_etal_SDF2
CLONE	PRIMER_LEFT	LEFT_TM	LEFT_GC_PERCENT	LEFT_START	PRIMER_RIGHT	RIGHT_TM	RIGHT_GC_PERCENT	RIGHT_START	Start BP	Repeat	End BP	Type
HMEZZP203HAN4O	ACCAAGGGTGTTTCTCATAACAG	59.377	43.478	51	GAATCAGGCTTGTGGCGAG	59.643	57.895	225	133	(CT)^8(GT)^11	171	Compound
HN7TS9H02C05QC	GACACCGACAAAGTAGAAGCC	59.679	52.381	217	GAACTGTGCCTATCACGCC	59.351	57.895	520	357	(ATT)^17...(ATT)^8(AGT)^8	486	Compound
HN7TS9H02D7HBE	GGGCCTTCTGACTTGTTGC	59.786	57.895	135	CCAGTTTCAGGGTGTTGCC	59.709	57.895	477	341	(ACT)^8(AAT)^9	392	Compound
HN7TS9H02DRP07	GGCATTCCTGTGCTGACCC	61.803	63.158	117	AGGATCTACAGATTGTCTCCAC	57.485	45.455	457	354	(AC)^10(AG)^11	396	Compound
HN7TS9H02EBM7U	CCACGGGTGTGAACAATGG	59.787	57.895	60	CAGTTTAACCCACTGCGCC	60.158	57.895	393	275	(GGCT)^11(ATCT)^11	363	Compound
HN7TS9H03FICUH	GCCGTTGGATTGCTCTTCC	59.937	57.895	370	GATGCCAGTAATGGGACGG	58.739	57.895	570	482	(GCTT)^8(ATTT)^6	538	Compound
HN7TS9H03GODGS	TCGACCTTGTTGTAAGCCG	58.533	52.632	26	AGGTGGTGTCCAGTCTTGC	60.309	57.895	241	78	(AAAT)^8(AAGC)^11	154	Compound
HMEZZP203F0LVN	CATGACCAAGCGATGTCCAG	59.731	55	58	AGCCTGTCTAACTCAGGAAAC	58.077	47.619	305	215	(AC)^9	233	Dinucleotide
HMEZZP203F7NU7	CCCTGCTGGTCCCTGAAAG	60.763	63.158	103	CCCATGACCACTGGATTGC	59.255	57.895	366	160	(AC)^11	182	Dinucleotide
HMEZZP203FK299	GCTTGGGCACCTTCATTCG	60.232	57.895	115	AGCACTACCATGGCCTGTC	60.157	57.895	386	175	(AC)^10	195	Dinucleotide
HMEZZP203FKADE	ACTTAGAATGCCCGTTCAGC	59.013	50	61	GCATCTTTCTTAAATCTTGGTGCC	59.657	41.667	228	111	(AC)^10	131	Dinucleotide
HMEZZP203FKOTU	CCACCTTCCAAGCTGACTG	58.81	57.895	63	AGTCTTTCTCCACATGGCAAC	59.254	47.619	290	243	(GT)^8	259	Dinucleotide
HMEZZP203FL2QI	TCACATTCCTGCTGAGGGAC	60.151	55	14	CCGTCGGGCCACTTTATTG	59.643	57.895	297	219	(GT)^10	239	Dinucleotide
HMEZZP203FNZC4	ATGAGTGAGCGCATGCCAG	61.565	57.895	131	ATGCATCAAGGCACCGC	59.099	58.824	310	249	(GT)^8	265	Dinucleotide
HMEZZP203FOLTT	AGATTTCTGTGTGTACTTTCATGG	57.961	37.5	4	CAGATGGAACCACTTGGGAG	58.639	55	198	63	(GT)^14	91	Dinucleotide
HMEZZP203FRBR0	AGCCTTTGCCCAGGTCTAC	60.081	57.895	103	AGTCCGCTCGCATACTGTC	60.305	57.895	333	197	(AG)^8	213	Dinucleotide
HMEZZP203FRD2B	GCAATGAACTACCTCCCAGC	59.369	55	110	TTAGGCTGTGCCATTTGCC	59.479	52.632	374	310	(AC)^8	326	Dinucleotide
HMEZZP203FY1G1	AGATTTCTGTGTGTACTTTCATGG	57.961	37.5	4	GGGAGAATAGTTTCACCAAGGAC	59.508	47.826	182	63	(GT)^14	91	Dinucleotide
HMEZZP203FYUSE	GGCTGCCACCTGGATCAC	61.189	66.667	167	AGTTTATAGCAGTGTTCCTTTCCC	59.524	41.667	341	289	(AC)^8	305	Dinucleotide
HMEZZP203FYUU8	CCTACCCTCCCATTAAGATCTGG	60.2	52.174	49	TGTATGCTGCCCACTAATCC	58.124	50	318	232	(AC)^9	250	Dinucleotide
HMEZZP203G02GS	GGGTCACGACCAGAGTCC	59.772	66.667	130	GCCAAGATGATGAACTATTACAGGG	60.303	44	355	282	(AC)^11	304	Dinucleotide
HMEZZP203G1C22	ATCAACATGGTCCAGCACG	58.888	52.632	58	ACAATAGTGTACCTACCTCGG	57.041	47.619	217	159	(AC)^14	187	Dinucleotide
HMEZZP203G1LGW	AGCAACACAGTCTTTGAGGTC	59.192	47.619	79	GAACCACTGCACCACCTTG	59.712	57.895	308	200	(GT)^8	216	Dinucleotide
HMEZZP203G1XAQ	GCACACAACTGTGCCGTAG	60.158	57.895	50	GGTTAGTGAATTTGCTTGGCG	59.146	47.619	267	194	(GT)^13	220	Dinucleotide
HMEZZP203G5M12	CTGCTCCGGTCTTGTACCC	60.53	63.158	64	ACAGCAACAGTGGGATTGC	59.407	52.632	363	155	(CT)^10	175	Dinucleotide
HMEZZP203G8I9R	GCAGGAAGTCAAAGGGCAG	59.486	57.895	45	CTTTGGCCAGTTTGCAGGG	60.382	57.895	319	97	(AG)^8	113	Dinucleotide
HMEZZP203G9XKB	TCTAAACAACCCTAATATCTTGCAG	57.676	36	10	CAAGAAATCCTCAGCAACCTTAC	58.457	43.478	224	176	(AC)^8	192	Dinucleotide
HMEZZP203GAPZY	TAATGGGAACCACTGCGAC	58.205	52.632	0	TGAAGCGAGAGGACTTCCAG	59.866	55	255	31	(GT)^8	47	Dinucleotide
HMEZZP203GB1W9	ACACCTTTGCATTCAGTGGC	60.08	50	54	ACAGCTATTTATAAGGAACACCTCC	59.19	40	216	147	(GT)^10	167	Dinucleotide
HMEZZP203GC3B0	ATCACTGGGATACAAGCCG	57.661	52.632	5	TTTCTTCAGTGTATCATTCGCC	57.547	40.909	164	35	(AG)^9	53	Dinucleotide
HMEZZP203GD8L9	AGATTTCTGTGTGTACTTTCATGG	57.961	37.5	4	CAGATGGAACCACTTGGGAG	58.639	55	200	63	(GT)^14	91	Dinucleotide
HMEZZP203GE0BW	CCTTTCAGCCAAAGGGTAGC	59.579	55	24	CTGCCAAGAAATAGGGCTGTC	59.738	52.381	177	83	(GT)^11	105	Dinucleotide
HMEZZP203GF276	TACAGTCGGCAGTGATCCG	59.936	57.895	85	CAGCTGCTATCATGGTGCG	59.793	57.895	376	261	(GT)^8	277	Dinucleotide
HMEZZP203GFJJ4	CGTCAGCGTCAATCATACCG	59.879	55	74	TTCCAGGTAAGGCACTGGG	59.696	57.895	314	149	(AC)^9	167	Dinucleotide
HMEZZP203GH65M	CCCTTGGTTTGCACTTGGG	60.007	57.895	82	TGTGGGTCCTTCTGTTGGC	60.613	57.895	231	120	(AG)^8	136	Dinucleotide
HMEZZP203GLMZB	ACAGGGTATCTGGAGATCCTTTAC	59.886	45.833	7	GTCACACGTGATTCTCGCC	59.653	57.895	213	102	(AG)^13	128	Dinucleotide
HMEZZP203GQ7QE	GAGCCTCGGTTCTCATTGC	59.348	57.895	57	GGGTAGGGACACAATGTAAGTC	58.895	50	419	325	(AC)^9	343	Dinucleotide
HMEZZP203GQYQ5	GGTTGGCCTACATCAGTGC	59.264	57.895	27	TGCTTTGGTAGCGCATTCAG	59.941	50	247	63	(AG)^9	81	Dinucleotide
HMEZZP203GR9A3	ATCAGGCAGAAGCACTCC	57.369	55.556	44	AGAGTGTTCCCACTACCCTG	59.127	55	316	241	(AC)^10	261	Dinucleotide
HMEZZP203GSD5W	GCTGGTGAAATGGTGCAGG	60.158	57.895	0	AGGGCTCACAGGGTCAAAG	60.004	57.895	441	162	(GT)^10	182	Dinucleotide
HMEZZP203GTA2R	AGATTTCTGTGTGTACTTTCATGG	57.961	37.5	4	CAGATGGAACCACTTGGGAG	58.639	55	196	63	(GT)^14	91	Dinucleotide
HMEZZP203GX1T3	CGGAAACACTCTGGCCAAC	59.79	57.895	132	GGCGCATTGCATTGTTCAC	59.652	52.632	360	245	(AT)^11	267	Dinucleotide
HMEZZP203GXJ0I	TTGACACTTGGCTTCCCTG	58.337	52.632	30	ACTCCTATGCCCTGTGCC	59.438	61.111	466	115	(GT)^9	133	Dinucleotide
HMEZZP203GXMUN	AGACCATGAGACGCACCTG	60.158	57.895	72	TGAGAGCACTGCAAGTCCC	60.383	57.895	332	225	(AC)^10	245	Dinucleotide
HMEZZP203GXW28	AGCAGTCTTGCTATGGAAGC	58.72	50	0	CACGTGCTACTAACCCTGC	58.983	57.895	207	66	(CT)^9	84	Dinucleotide
HMEZZP203GZAKG	AGTACCCTTTGCTCCTGACC	59.787	55	41	TGTCCTTGTGACCAAATGGC	59.433	50	287	130	(GT)^10	150	Dinucleotide
HMEZZP203GZNBH	ACCGGTTTATGCCATTCAAG	57.139	45	1	ACAGCCACTTCCTCACCTG	60.005	57.895	381	92	(CT)^11	114	Dinucleotide
HMEZZP203HBF2Y	TCGATCTGCATTCTCAGCC	58.069	52.632	15	TGAAGCTTGCACGGTATGC	59.568	52.632	204	54	(AC)^15	84	Dinucleotide
HMEZZP203HCWF2	ACAGGGTATCTGGAGATCCTTTAC	59.886	45.833	7	ACCGTGATTCTGCCTCTGG	60.157	57.895	215	102	(AG)^13	128	Dinucleotide
HMEZZP203HE9PN	GCTGTTAGCTGTGCAGAAATG	58.881	47.619	27	GTTGATGGAGCACCTGAGC	59.267	57.895	390	138	(AC)^11	160	Dinucleotide
HMEZZP203HF44A	AGGATTGAAACTTCCTCGGTG	58.703	47.619	144	TTCAGAAGGTGACCCAGCC	60.004	57.895	313	235	(GT)^14	263	Dinucleotide
HMEZZP203HG3YJ	TGATTTGTGCCACTTGGCTG	60.08	50	153	TCTAAGACAGGGTGCAGTTTC	58.36	47.619	307	194	(GT)^10	214	Dinucleotide
HMEZZP203HGBRZ	TCTGCTGAATCTCCAACGAG	58.087	50	60	GCAAATTGTAGCACATCTGTATCC	59.244	41.667	276	177	(AG)^8	193	Dinucleotide
HMEZZP203HGNYP	CCTCCAGGCCTCTTCTTGG	60.157	63.158	18	TGTGCTTCTCACTGACATTCC	58.987	47.619	207	150	(AG)^8	166	Dinucleotide
HMEZZP203HHJKA	GTGGTGGTTGAGACATGGAC	59.227	55	6	GCTCCCAAGCCCAAATGAC	59.858	57.895	363	161	(GT)^8	177	Dinucleotide
HN7TS9H02C01F1	GCTGAGGACTCGATGAAGC	58.763	57.895	204	AGGAAACGGAGATGAGCAC	57.905	52.632	456	364	(GT)^9	382	Dinucleotide
HN7TS9H02C0682	TGCAGCCTGATTTGCCATC	59.557	52.632	143	CGGCCTTGTGAGGTAGGTC	60.53	63.158	385	212	(AC)^8	228	Dinucleotide
HN7TS9H02C06EA	TGTAATTGCCAAGAGTTTCCC	57.18	42.857	139	GTCTGGCTGAATTGGGCAC	59.86	57.895	511	279	(AC)^9	297	Dinucleotide
HN7TS9H02C0Y2B	CCACTCCCAACCTCTACGG	59.856	63.158	172	TGTGACACTGACTGCAAACG	59.733	50	453	408	(AC)^8	424	Dinucleotide
HN7TS9H02C1D4N	TGCTCAGCCACAACAGAGG	60.684	57.895	34	CACAATCCTCATTCCCAGTGC	60.011	52.381	196	96	(AC)^8	112	Dinucleotide
HN7TS9H02C1FAM	CACACGTTGCACCCTTCAG	60.085	57.895	86	CCCACGCCACCATCATTTG	60.232	57.895	335	198	(AC)^12	222	Dinucleotide
HN7TS9H02C1YTZ	GAACATGCTCTGCGTCCC	59.238	61.111	38	ATCAGCCAGGGCATATCGG	60.081	57.895	475	216	(CT)^9	234	Dinucleotide
HN7TS9H02C269L	GCACCTGACCATAAGGCAC	59.264	57.895	268	TCCGTGGGTCGTCAATGG	60.085	61.111	502	412	(AC)^9	430	Dinucleotide
HN7TS9H02C2BH6	GCCTCACTTGAATCAGCCC	59.261	57.895	21	TCATCCTGTTGCCGTTGAC	58.817	52.632	215	152	(AC)^11	174	Dinucleotide
HN7TS9H02C30SD	ACATGACCCAAGTCGTCCC	60.082	57.895	320	TACGAGACCAACGTAGCCC	59.562	57.895	643	498	(AT)^9	516	Dinucleotide
HN7TS9H02C382S	GCTCTGATTTCCGCTTGGC	60.305	57.895	256	AGCAATCTCCTTGCAGCTTATG	59.815	45.455	504	378	(GT)^8	394	Dinucleotide
HN7TS9H02C3JVJ	ACAAGGGAGTATGTCGCAC	57.912	52.632	81	TCTGGAACTGATGGCTGGG	59.774	57.895	319	112	(GT)^8	128	Dinucleotide
HN7TS9H02C3M54	TTCTCGGACCATGAGACGC	60.232	57.895	270	CCACTCAGCGCTCTTCAAC	59.574	57.895	493	428	(AC)^8	444	Dinucleotide
HN7TS9H02C3TJ2	AGCCCTGGGATCAATCAGC	60.234	57.895	209	CCAGGCCAACACCCTAGTC	60.46	63.158	571	504	(AC)^9	522	Dinucleotide
HN7TS9H02C3UGX	AATGCAGGGCACAAGGATG	59.172	52.632	338	CCAGGAAGCTGATTGATGGC	59.724	55	651	588	(GT)^8	604	Dinucleotide
HN7TS9H02C3ZV4	GGGAACACCAAACATCTGGG	59.504	55	16	GGGTAAGGGCCTATCTGGG	59.308	63.158	389	90	(AC)^13	116	Dinucleotide
HN7TS9H02C42OG	AGGGATGCGTGAGGAGTTC	59.856	57.895	238	CCAAGGTCCACAAAGTTGGC	60.365	55	630	469	(AG)^14	497	Dinucleotide
HN7TS9H02C4C5M	TGCTCAGGGCTTGTCAGTC	60.383	57.895	117	AAATGTCTGGCATAGCTAAAGG	57.238	40.909	542	462	(GT)^8	478	Dinucleotide
HN7TS9H02C53MP	GCCTTTCCGGAGTGGTAGG	60.533	63.158	270	AAGGCAGGGCTGTCCAC	59.916	64.706	596	505	(GT)^11	527	Dinucleotide
HN7TS9H02C5A6U	TCCCGATTTGTGTTGGGAC	58.421	52.632	257	TGACATCTAAAGGGCCACTCC	60.215	52.381	516	468	(GT)^9	486	Dinucleotide
HN7TS9H02C5BOG	ACATGAGTCTGTGCTTCCC	57.81	52.632	319	ACTTAAGAAGTAAGATCCTTCACAG	57.092	36	609	540	(AC)^11	562	Dinucleotide
HN7TS9H02C5JSE	TCATCAGTGGCTGACTAGGG	59.279	55	322	GCAAAGCTCAACAGCTCGG	60.522	57.895	586	374	(GT)^10	394	Dinucleotide
HN7TS9H02C6G9W	AGTCAACTGGCGGAAGGTC	60.383	57.895	11	GGCTCTGGGTTCTCTAAAGC	58.723	55	328	258	(AC)^13	284	Dinucleotide
HN7TS9H02C76GM	AAAGCAGGGCTGGTACCTC	60.081	57.895	148	GGAGTTTCCCATGCTGTCC	58.878	57.895	341	191	(GT)^8	207	Dinucleotide
HN7TS9H02C7JW3	CACTGTACAACTGCGCTGG	59.867	57.895	130	AGTATTGTCATTTGGCCTGGAG	59.148	45.455	415	365	(AC)^9	383	Dinucleotide
HN7TS9H02C7OTO	AAGATTGGTGGCCTGGAGC	60.767	57.895	164	CCTCACGTGTCAGAACTAGC	58.754	55	496	348	(GT)^13	374	Dinucleotide
HN7TS9H02C80KY	AGTAAGCTGCCTAGAGGGTC	58.986	55	13	GCCTGGAGGAGTGTTGTCC	60.758	63.158	170	69	(AC)^8	85	Dinucleotide
HN7TS9H02C98CL	AAGTGGGTTCCTGTGGCTC	60.31	57.895	158	GTTGGACTGTGGTCTTACTGC	59.607	52.381	553	451	(AC)^8	467	Dinucleotide
HN7TS9H02CYO02	TCCATCACTGCACCCTTGG	60.386	57.895	191	AGGCAGGCAGATTATGGTC	57.637	52.632	551	421	(GT)^10	441	Dinucleotide
HN7TS9H02CYZKF	TGGAAAGCCACCAGTCCTC	60.004	57.895	148	TCTACGATGCAGGTGCGAC	60.598	57.895	498	394	(GT)^12	418	Dinucleotide
HN7TS9H02D0ERB	CTCTATCCACACATGCTGTACG	59.373	50	9	AGTTCTCCGGATTCGCCC	59.848	61.111	164	44	(AC)^8	60	Dinucleotide
HN7TS9H02D0GA7	GCCTACTGAGGAAACGTGC	59.277	57.895	52	GTGGTCATTGTGCAGAGGC	59.862	57.895	373	116	(AC)^8	132	Dinucleotide
HN7TS9H02D0K8I	AGTTCATGGTGCCTCTTGC	58.801	52.632	173	CCATTTAGAACGGGAACGTCTG	60.078	50	578	450	(AC)^11	472	Dinucleotide
HN7TS9H02D0SIV	GTGCTTGCTACAAACATGACC	58.809	47.619	216	GGTGAGTCTTAATGCATGGGC	60.079	52.381	584	250	(GT)^8	266	Dinucleotide
HN7TS9H02D0W0M	GGTGCAGTTGGAGCATTGG	60.158	57.895	255	GGTGGTTCTGTTGGCATCC	59.483	57.895	539	391	(AC)^9	409	Dinucleotide
HN7TS9H02D1FLU	TCCTTCTGTGTGACCCTCG	59.403	57.895	4	TGCTCACCTTCAGGCACTC	60.383	57.895	331	200	(CT)^9	218	Dinucleotide
HN7TS9H02D2ACH	CATGACCTCTGGGAAACAGC	59.296	55	193	AACTGAGAGGTGTCGTGGC	60.382	57.895	601	537	(AG)^8	553	Dinucleotide
HN7TS9H02D2QMF	TAGGCCAAATCCCATGTGC	58.556	52.632	16	AGGCTGTTCCAACCCTCTG	60.004	57.895	331	144	(AC)^8	160	Dinucleotide
HN7TS9H02D2RTP	GGCCCAGGATGTGCTTTAC	59.257	57.895	251	ACTTTACGTGTGCAACGCC	60.086	52.632	682	351	(AC)^9	369	Dinucleotide
HN7TS9H02D3E7Q	GAACACCTTGGGTGATGCC	59.483	57.895	13	AAAGCTCTTGCCACCAGGG	60.995	57.895	382	140	(AC)^14	168	Dinucleotide
HN7TS9H02D47PG	TGATGCAAGAAACCCAATCCC	59.592	47.619	75	GCTTCCATCTGTCCTACATAGTC	58.887	47.826	291	231	(CT)^8	247	Dinucleotide
HN7TS9H02D4RJS	CACGTGACACCATTCCCAG	59.197	57.895	43	AGGAGTGGCTTTCTGTGGC	60.688	57.895	279	90	(AC)^9	108	Dinucleotide
HN7TS9H02D5AM7	GTTCAGTGGATGGTTTCCCAC	59.874	52.381	157	TGGATGGAGTCACGGAAGC	60.157	57.895	413	247	(AC)^11	269	Dinucleotide
HN7TS9H02D5ZMM	TTCCCAATCTGGTGCCCTC	60.08	57.895	176	TTTGCATGTGTCCCAACGG	59.71	52.632	423	328	(GT)^14	356	Dinucleotide
HN7TS9H02D687I	TGCTCATCCTTTGCTGTGG	58.802	52.632	152	TACATCATGCAACTGGCCG	58.966	52.632	574	400	(AC)^8	416	Dinucleotide
HN7TS9H02D6NDU	GAGCTGCCAAAGAACAGGG	59.486	57.895	219	AGTGTCTCCAATTGTGCAGG	58.857	50	575	318	(GT)^9	336	Dinucleotide
HN7TS9H02D8KUC	GGTTGGCCTACATCAGTGC	59.264	57.895	97	TGCTTTGGAGCGCATTCAG	59.863	52.632	310	133	(AG)^9	151	Dinucleotide
HN7TS9H02D8VA9	AAGGCCAATGAGCAAGCAC	59.782	52.632	59	AATAGCCAGGGATCTGGGC	59.616	57.895	393	287	(GT)^8	303	Dinucleotide
HN7TS9H02D9W1B	CACCACCTCAGAATACTGCC	58.723	55	85	AGACTCGGTGAAGCACATC	57.921	52.632	375	304	(AG)^11	326	Dinucleotide
HN7TS9H02DA91P	GGGATGCTGACAGAAACGTG	59.942	55	44	CCTTCTGCTTGTATGAACAGACC	60.076	47.826	397	263	(AG)^9	281	Dinucleotide
HN7TS9H02DAAWL	TCAACAGGCAAAGTTTCTGG	57.21	45	46	CGCCTCCCACAGCTAAATG	59.343	57.895	257	78	(AC)^11	100	Dinucleotide
HN7TS9H02DAC7D	ACATGGACACAATGCGGAC	59.19	52.632	60	GGCGAACTTTGGATACGCC	60.012	57.895	339	289	(AC)^8	305	Dinucleotide
HN7TS9H02DASEA	TATAGTCACCCAGGGCACC	58.846	57.895	228	AGGCTGGACCACATAGAGG	58.848	57.895	617	496	(GT)^8	512	Dinucleotide
HN7TS9H02DB44C	TGCAGCCATTGATATTCAGC	57.293	45	169	ACATACAACTTGCTTCCCAAC	57.473	42.857	369	298	(AC)^8	314	Dinucleotide
HN7TS9H02DBN2L	AGGGTGGTGACCTACAGGG	61.01	63.158	251	GCCTCCTCAAATCTTCTGCC	59.367	55	501	369	(GT)^11	391	Dinucleotide
HN7TS9H02DDNGY	GACATCTGGGATCAAGCCAC	59.081	55	14	ACCAGTGTAGCACAGGCTC	60.082	57.895	347	46	(AC)^12	70	Dinucleotide
HN7TS9H02DDS7B	TCATCCTGACAACAGGCTC	57.506	52.632	3	TTGCCTGCCAAGTGCTATG	59.181	52.632	441	164	(AC)^10	184	Dinucleotide
HN7TS9H02DE442	CTTCTGTTTGCCTGGAGCC	59.486	57.895	313	TCTTGCTTCTGGGACGTTATAG	58.375	45.455	481	424	(AC)^8	440	Dinucleotide
HN7TS9H02DEI2X	TGATTCCAACATTGCTCTTCTAGG	59.587	41.667	5	CTTGCCTGGCCACTGTTTC	60.083	57.895	219	43	(GT)^12	67	Dinucleotide
HN7TS9H02DEJHG	CCAGTCTTCCACCTGTTTGC	59.797	55	90	TGGGTTGGGCATGACTTTG	59.016	52.632	432	140	(AC)^13	166	Dinucleotide
HN7TS9H02DETTZ	TTCCACCACTGTTCTTGCG	59.042	52.632	116	CTGAGCAGGTACTAGGCTCC	59.722	60	423	297	(GT)^9	315	Dinucleotide
HN7TS9H02DEVRB	CCATGAAAGTGTCCACCCG	59.19	57.895	136	TTGCTGAGCCATTGCAGAC	59.487	52.632	517	210	(GT)^8	226	Dinucleotide
HN7TS9H02DF4MV	TGCCACTTTCCGGCTACAG	60.756	57.895	195	GCCACAGTTCCAGACAAGC	59.788	57.895	584	498	(GT)^8	514	Dinucleotide
HN7TS9H02DF9DS	CAACATGCTCCACCTTGGC	60.158	57.895	59	TCTTGGAGACCGGAAGCTG	59.78	57.895	395	210	(AC)^8	226	Dinucleotide
HN7TS9H02DFZJ7	CAGAGGGTCTCGTTCCGTG	60.526	63.158	71	CTCCATGTAGGACCAGCCC	59.929	63.158	377	205	(AC)^15	235	Dinucleotide
HN7TS9H02DGPK0	GCTCTGCGACAGAAGAACC	59.281	57.895	10	GCAGGTGGCAACATGAAGG	60.158	57.895	350	85	(GT)^15	115	Dinucleotide
HN7TS9H02DGTMF	ATCACGGGCAGCAGAACTC	60.829	57.895	50	CCTGGCCATTCACACAAGG	59.482	57.895	351	296	(GT)^9	314	Dinucleotide
HN7TS9H02DGZ8P	TGCTCGGCTGAAGTAGGTC	59.859	57.895	25	TGCAGCCCACTTGGTACAG	60.686	57.895	373	309	(GT)^14	337	Dinucleotide
HN7TS9H02DHAVN	AGTGGCTTCCCAGGCTATC	59.543	57.895	152	TGTAGAACCGCAAAGGCAAG	59.514	50	568	376	(GT)^9	394	Dinucleotide
HN7TS9H02DIW6Z	TGAAGATGGATTTGAAGCTTTCC	58.119	39.13	212	TCTAAAGAACCCTGACCAAGC	58.348	47.619	606	249	(AT)^8	265	Dinucleotide
HN7TS9H02DKFA4	GCCAGGCATCTGGTAGGTC	60.609	63.158	21	TTGGACTTTGCCTTCAGCC	59.024	52.632	450	275	(CT)^9	293	Dinucleotide
HN7TS9H02DKFJ0	CATGCGAACCCAGCACAAG	60.524	57.895	36	CTGTTGGTCCTCCATGACAG	58.649	55	463	351	(AC)^9	369	Dinucleotide
HN7TS9H02DLCVL	TCTTCCCTCATCACAGAGGC	59.57	55	41	TGGGAACGAGTTGTTTCAGC	59.444	50	426	213	(AC)^8	229	Dinucleotide
HN7TS9H02DLE7K	AGTGTTGAAGCTGGCATTGG	59.794	50	35	CAAAGCAATTGTCCATGTTCCC	59.429	45.455	269	174	(CT)^8	190	Dinucleotide
HN7TS9H02DM1P3	TCTTCCCTCATCACAGAGGC	59.57	55	41	TGGGAACGAGTTGTTTCAGC	59.444	50	426	214	(AC)^8	230	Dinucleotide
HN7TS9H02DMJXL	TCTTTCTTTCAGCTAAGACAGCC	59.448	43.478	7	CAGTGCCTGGATAGCAACC	58.962	57.895	239	40	(AC)^9	58	Dinucleotide
HN7TS9H02DMR6E	CAACATCGAACTCGCTGGG	59.648	57.895	45	TCCCTACAGGTTGCTCAGG	59.083	57.895	349	266	(CT)^10	286	Dinucleotide
HN7TS9H02DNDNC	TTGGATGCCAACTGCAAGC	60.083	52.632	21	ATGCCTCAAACATGCCAGC	59.857	52.632	438	295	(GT)^10	315	Dinucleotide
HN7TS9H02DPW6U	CCTGTCTCATGTAGTAAATAACCCG	59.785	44	1	AGTCACCCTTCTTTGTGATGC	59.254	47.619	369	254	(AC)^9	272	Dinucleotide
HN7TS9H02DQ3YI	TGGGCTTATCTTGCAACACC	59.216	50	154	ATGTATGAACAGCTCCAAAGTC	57.19	40.909	375	319	(AG)^12	343	Dinucleotide
HN7TS9H02DQAES	GGCAGGATGGTTGGTTTCC	59.479	57.895	84	CAGTCCCAGGGCCATTAGG	60.233	63.158	485	294	(AC)^11	316	Dinucleotide
HN7TS9H02DQUCO	GGAGGTAGTAAGTAATGATGAGCC	58.986	45.833	85	AGCCTGGACATACCTCAGC	59.547	57.895	345	134	(AC)^12	158	Dinucleotide
HN7TS9H02DR1HV	ACTGATAGATCGCAGGAAGG	57.27	50	20	GCCATTCTACAGGACCCAAC	59.005	55	349	90	(AC)^11	112	Dinucleotide
HN7TS9H02DRFV3	GCTTTGGCTATTGGGTGGC	60.232	57.895	101	AGAGAAAGCTGTTCATTCCATC	57.183	40.909	547	488	(AC)^10	508	Dinucleotide
HN7TS9H02DRT68	CTGCAGTGTTCCCTTTGTCC	59.797	55	82	AGGAAGACCTGCCAGATGAC	59.861	55	357	124	(AG)^8	140	Dinucleotide
HN7TS9H02DS88N	ACACCTTATGATGGCAAAGGC	59.664	47.619	190	AGGGCGTTCATGCTATTTGG	59.364	50	476	263	(AC)^10	283	Dinucleotide
HN7TS9H02DSUX9	CGCAGACGCTACAAGATGC	60.087	57.895	355	GGTTCGAGTCGCCATGAAG	59.356	57.895	590	538	(AC)^8	554	Dinucleotide
HN7TS9H02DTMG0	GTGACAAGGAAGCGTTAAGGG	59.945	52.381	145	ACCAGGACCCAAACTAGCG	60.082	57.895	321	243	(GT)^10	263	Dinucleotide
HN7TS9H02DTTAU	GGTTGGCCTACATCAGTGC	59.264	57.895	97	TGCTTTGGAGCGCATTCAG	59.863	52.632	313	133	(AG)^9	151	Dinucleotide
HN7TS9H02DU0TI	GCTGAGGTGGACTCAGAAC	58.22	57.895	96	TCATGGGTAGCCACAGCTC	59.854	57.895	504	351	(AC)^8	367	Dinucleotide
HN7TS9H02DU4YZ	GGCCATGACAACACCGAAG	59.863	57.895	158	ACGGGCCACGTTAGAATTTAG	59.129	47.619	351	271	(AC)^9	289	Dinucleotide
HN7TS9H02DU9TU	GCTGTTCCCTTAAAGCGCC	60.232	57.895	130	TTTAACCCACTGCGCCAAC	59.711	52.632	346	248	(AC)^9	266	Dinucleotide
HN7TS9H02DV3FW	TAGGCCAAATCCCATGTGC	58.556	52.632	16	AGGCTGTTCCAACCCTCTG	60.004	57.895	331	144	(AC)^8	160	Dinucleotide
HN7TS9H02DVC1B	GGAGGCAAACACGGTCTCC	61.418	63.158	5	AGGACTTGGCCAGAAGGTG	60.004	57.895	157	102	(GT)^8	118	Dinucleotide
HN7TS9H02DVPC2	GTGTAGGCATGGAAAGGGC	59.257	57.895	5	AGTCTCCTGGACAGTTGTAGC	59.871	52.381	350	217	(AC)^8	233	Dinucleotide
HN7TS9H02DVUL4	TCCCTGCTGCAATCATAAGC	59.074	50	10	GGTGCAGCTAGCCACTTTG	59.862	57.895	180	67	(AC)^8	83	Dinucleotide
HN7TS9H02DVX2F	ACTGCCTGGAGCTGAAGTG	60.384	57.895	115	TTGTCTGGTACCCTCGTGC	60.083	57.895	458	298	(GT)^11	320	Dinucleotide
HN7TS9H02DXFVK	GGCACTTGCAGGAGGTTTG	60.083	57.895	252	AGCGTTCAGATTCAAGGCG	59.276	52.632	618	556	(GT)^10	576	Dinucleotide
HN7TS9H02DY1P4	ACTCTGCCCTTGCTTGCAG	61.36	57.895	16	ACCACCGACAATTTCAGCTC	59.227	50	435	324	(AC)^13	350	Dinucleotide
HN7TS9H02DY8P3	GGCACAATCCACCGTTCAG	59.863	57.895	110	AGGATGCGGAGCTGACTTC	60.232	57.895	402	233	(AC)^8	249	Dinucleotide
HN7TS9H02DYE7J	TCCTCTGCAGTCATGGAGC	59.855	57.895	200	TCGGTAGCCATCTGTTAGAGC	60.078	52.381	543	462	(AC)^9	480	Dinucleotide
HN7TS9H02DYLZY	TTGTGTGTGGCACCAAGG	58.816	55.556	92	AGAGGTAACTTTAATTAGCACCG	57.124	39.13	417	329	(GT)^8	345	Dinucleotide
HN7TS9H02DYP9H	AAGCTTGCAGAGTGGCTCC	61.06	57.895	393	CGGGTTTCCCACATGTATGC	60.011	55	576	464	(GT)^11	486	Dinucleotide
HN7TS9H02DZ3FW	CTGAAGCTGATGCACAGGAC	59.66	55	70	CCAGTCTTTAAACTAGCACTGGC	60.324	47.826	390	323	(GT)^10	343	Dinucleotide
HN7TS9H02DZG7K	GCCAAGAGGGTCCTGACTG	60.459	63.158	123	GCTGGAATGCAACCTGACC	59.86	57.895	426	310	(AC)^8	326	Dinucleotide
HN7TS9H02EAZ36	CTCTTGGGCCTAGCACTGG	60.534	63.158	180	GCCTGAAGTTGGAGCAAGC	60.158	57.895	511	257	(AC)^14	285	Dinucleotide
HN7TS9H02EBH8Y	GAAGGGTGGGCCTTCTTGG	61.07	63.158	123	GGCCATTGACCATTCCAGC	59.933	57.895	318	154	(AC)^8	170	Dinucleotide
HN7TS9H02EBHYJ	GCCAGGCATCTGGTAGGTC	60.609	63.158	21	AGCCAAAGATGCTTTCTGCC	59.865	50	402	273	(CT)^9	291	Dinucleotide
HN7TS9H02EBOQ7	ATGGTTTCAAGTGCCCTGC	59.402	52.632	90	CCAGAGTGCTCTTACTGGC	58.294	57.895	483	249	(AG)^11	271	Dinucleotide
HN7TS9H02EBY57	TCATGAGGCTCCAGTTGCG	60.829	57.895	316	GCACTGAATCTGAACGGGC	59.938	57.895	531	447	(AC)^10	467	Dinucleotide
HN7TS9H02ECEIS	GGGCAGCCATAATCAGGAAAC	60.078	52.381	79	ACACCAGGTCTGGGATACAG	59.2	55	390	127	(AC)^9	145	Dinucleotide
HN7TS9H02ECSHL	AGCAGGGTATGGAGGGAAC	59.152	57.895	59	AAGGCTGAGCTTAGGACGG	59.856	57.895	414	123	(AG)^10	143	Dinucleotide
HN7TS9H02EDWE9	CTCAGGACTTCATGTCTGCC	58.729	55	8	TTCTGGCAACCAAGTTTCG	57.104	47.368	454	240	(GT)^10	260	Dinucleotide
HN7TS9H02EEEK8	GGGATGCTGACAGAAACGTG	59.942	55	44	CCTTCTGCTTGTATGAACAGACC	60.076	47.826	395	262	(AG)^9	280	Dinucleotide
HN7TS9H02EERJM	CCAACGTCACTTGAAGCCC	59.79	57.895	43	CATGGGTGGAACCTTTGGC	59.781	57.895	222	103	(AG)^8	119	Dinucleotide
HN7TS9H02EFDV3	TGGACCGAGTGACTTCCAG	59.403	57.895	27	CAGTGCCTCTTCCAGGAGC	60.831	63.158	436	298	(AC)^12	322	Dinucleotide
HN7TS9H02EFFRL	TAGCCGCAACTCATCCGAG	60.306	57.895	278	GAGTGCCCAAATTGCTACCC	59.938	55	432	330	(AT)^8	346	Dinucleotide
HN7TS9H02EFOO2	AGAACATGCTGCCTCTGGG	60.461	57.895	243	TTTGCCAAGGTCTGAGGG	57.505	55.556	506	326	(AC)^9	344	Dinucleotide
HN7TS9H02EGP1T	ACCCTCCTGATTGCATCCC	59.848	57.895	34	GCTCAAGCCAGTTCTGTCG	59.574	57.895	403	339	(GT)^9	357	Dinucleotide
HN7TS9H02EGQYN	ACACCAAATAAACCTTCCCTATGC	60.072	41.667	283	GCCCAGGAGAACCAAATTCC	59.575	55	582	350	(AC)^8	366	Dinucleotide
HN7TS9H02EHW59	GCTGGACAGCTACCTTTCTG	59.017	55	247	CTGCTTCTGAGCCTTTGTCC	59.585	55	456	398	(AC)^11	420	Dinucleotide
HN7TS9H02EIEQV	CCAGCTTCCTGATGATTGGC	59.724	55	224	AGAGCAAAGTCCCACTGAAAG	58.908	47.619	474	408	(AC)^9	426	Dinucleotide
HN7TS9H02EIPWO	CAAGCCAGTGTGAGCAACC	60.084	57.895	106	GCAGTGCTGCTGATCAAGG	59.937	57.895	492	239	(AG)^9	257	Dinucleotide
HN7TS9H02EJZMV	GGGACAAACAGTTATTGGAACC	58.246	45.455	364	CAGATTCGAACCCGGCAAC	59.939	57.895	712	446	(AC)^13	472	Dinucleotide
HN7TS9H02ELQ4D	TGTTTCTGACTGGATCTGGC	58.279	50	34	CCAACCATGCCTAAGCCTC	58.953	57.895	341	150	(AC)^12	174	Dinucleotide
HN7TS9H02EM666	AGTGCCCATGTCAAAGTGC	59.407	52.632	20	GGACGTTTCCTTTGGTCAGC	60.152	55	362	212	(GT)^13	238	Dinucleotide
HN7TS9H02EMCQ3	AGCCACAGTTCTCTAGGTGG	59.497	55	3	TAGTGCGCTTTACCTCGGG	60.232	57.895	434	190	(GT)^10	210	Dinucleotide
HN7TS9H02EMG41	TGCTATCCTCAGAAGTTGCC	58.06	50	73	TGCTGGGAGAGGGATTTGG	59.771	57.895	392	224	(CT)^8	240	Dinucleotide
HN7TS9H02EMHZT	AGCTCTGAAGGAAGGGTGC	60.081	57.895	163	TGTCCAGTTCACGTAGGGC	60.083	57.895	554	455	(AG)^11	477	Dinucleotide
HN7TS9H02EMKRQ	AGTAAGCTGCCTAGAGGGTC	58.986	55	13	GCCTGGAGGAGTGTTGTCC	60.758	63.158	170	69	(AC)^8	85	Dinucleotide
HN7TS9H02EMMK7	TGCACAGATACTTCAGCCTC	58.074	50	130	TGTAATTAACCTAACCTACGGATGTC	59.286	38.462	335	205	(AC)^16	237	Dinucleotide
HN7TS9H02ENHGX	CCTTGCAGGTTTGCCTTCC	60.083	57.895	160	TTGCAATGGCCTTCTGTGC	60.083	52.632	411	212	(AT)^9	230	Dinucleotide
HN7TS9H02ENUOG	TGTGCCTACGGGTTAGCAG	60.158	57.895	159	ACAGCACATGGATTTCTGAGG	59.045	47.619	522	339	(AC)^11	361	Dinucleotide
HN7TS9H02EO038	GGCCACATGTTTCCCATCC	59.554	57.895	23	GGAAGAAACCGAGTTGGGC	59.489	57.895	416	240	(AC)^11	262	Dinucleotide
HN7TS9H02EOO4N	AGGGCCTGGAGGAAAGTTG	60.003	57.895	277	TGGGAACAGAGGTCAGCAC	60.006	57.895	491	399	(AG)^10	419	Dinucleotide
HN7TS9H02EP6E5	CCACTGTCGGAATCTCACC	58.299	57.895	18	GCAACAAACTGGTCCTGGG	59.709	57.895	240	91	(AG)^8	107	Dinucleotide
HN7TS9H02EQ8LE	TCCCAGGAACTGGAACACC	59.619	57.895	402	CAGCTCACTGATGCACTGG	59.271	57.895	595	489	(AC)^11	511	Dinucleotide
HN7TS9H02EQGF3	GCAGGGTCTTTCAGAATCAGG	59.396	52.381	184	AAACATTTGCAATGCTCTATGC	57.291	36.364	370	319	(AG)^8	335	Dinucleotide
HN7TS9H02EQPL5	AGTGTGCTTTGTGCTGAACC	60.01	50	54	GCATTTGTAATACCTCGATGTGC	59.221	43.478	204	141	(GT)^15	171	Dinucleotide
HN7TS9H02ER8LQ	GGCTCGCAATGTTCCCTTC	59.937	57.895	82	TTCTGCATTTCGGTGCCAG	59.488	52.632	522	308	(AC)^9	326	Dinucleotide
HN7TS9H02ES24G	TGCAGGCACATCAGAGGAC	60.459	57.895	62	ATGCTCAGCCTTCCGTCAG	60.532	57.895	422	97	(AC)^11	119	Dinucleotide
HN7TS9H02ESU2C	GCATCGGGCTCAACTTCTG	59.643	57.895	74	CGGACGAATCAGCTCTTGC	59.724	57.895	423	199	(AC)^9	217	Dinucleotide
HN7TS9H02ETTDF	AGGGATGGAAACAGCAAGG	58.087	52.632	247	GGGATGACCTCGGGTTCTG	60.233	63.158	397	293	(AC)^13	319	Dinucleotide
HN7TS9H02EUJ99	ACCTTATTGCGGCTTTCCC	58.873	52.632	67	GCCCTGAAGTACCAAAGCG	59.568	57.895	272	216	(GT)^9	234	Dinucleotide
HN7TS9H02EV2LY	GTCCATGGGCATAAGCAGG	59.028	57.895	324	CCTTCCCACCTTTCAACCC	58.71	57.895	608	534	(GT)^11	556	Dinucleotide
HN7TS9H02EWMUP	ACTGCTCTGGACACCCTTTC	60.368	55	18	AACAGGGCCTTTCGAGTCC	60.384	57.895	408	64	(AG)^8	80	Dinucleotide
HN7TS9H02EXAG1	TTGTTCTGTTGATCACTGCC	57.011	45	71	AGACTCCACACTCATGCTG	57.517	52.632	227	113	(AG)^13	139	Dinucleotide
HN7TS9H02EXGF8	CGGTCACGTCCATGCTTTC	59.941	57.895	89	CGAAGCCCTCCTTCAGTTG	58.896	57.895	381	220	(AC)^9	238	Dinucleotide
HN7TS9H03F0UBM	GAAGGCCTGTGAAAGACCAC	59.512	55	22	CTACCCACAGGTGCCACAG	60.758	63.158	407	179	(GT)^10	199	Dinucleotide
HN7TS9H03F2831	AGCGAGTTGGCAATCTTAACC	59.671	47.619	134	TTCTACCCTCGAAGGAGCC	58.863	57.895	347	264	(GT)^10	284	Dinucleotide
HN7TS9H03F2G69	TCCCTGCTGCAATCATAAGC	59.074	50	10	GGTGCAGCTAGCCACTTTG	59.862	57.895	178	67	(AC)^8	83	Dinucleotide
HN7TS9H03F3AYU	TGCAATTCCTGTTGCAGCC	60.083	52.632	251	TTTAGAGAGGATTTGAGTTACATGG	57.377	36	523	461	(AC)^10	481	Dinucleotide
HN7TS9H03F44XY	AGGAAATGTTTGCAGCTGGG	59.791	50	68	AGGAAACGGAGATGAGCAC	57.905	52.632	314	203	(GT)^9	221	Dinucleotide
HN7TS9H03F45GC	TCGGAGTTGAAGCACTGGG	60.383	57.895	65	CAACTGGGTGTCATTGGGC	59.783	57.895	499	126	(AC)^8	142	Dinucleotide
HN7TS9H03F4Z0U	AGCTCTACTGGGAAGGATGC	59.642	55	44	TGGTGGCACTCTTGGAAATG	59.142	50	259	77	(AC)^10	97	Dinucleotide
HN7TS9H03F68BA	TGCACAGAGCTGGACGTG	60.708	61.111	31	GAGTTGTGCATCTTCGCCC	59.938	57.895	292	109	(AC)^10	129	Dinucleotide
HN7TS9H03F6IUK	CACACATCGGGCCTACTGG	60.902	63.158	91	AGCAAGTGACCCTTCTAATTTC	57.107	40.909	499	431	(AC)^9	449	Dinucleotide
HN7TS9H03F84B2	CAGCTGCAATCCTTAGCCC	59.336	57.895	26	GGCCACATTGTTGAACCCG	60.453	57.895	410	153	(AC)^9	171	Dinucleotide
HN7TS9H03F8R4B	ACGTGCATTCTGCAATCCG	59.938	52.632	390	ACTTCTATGACTTTGCAGGAAGAC	59.53	41.667	651	520	(AC)^9	538	Dinucleotide
HN7TS9H03F91FC	GCATGCTCTGCATCACTAAGG	60.147	52.381	21	ACGTGGATGTACAAATGGGC	59.295	50	422	166	(CT)^11	188	Dinucleotide
HN7TS9H03FG37H	TCCATAGGAAATGGGTACTGGG	59.736	50	38	GCTCTGTTCACTTGCTGGG	59.491	57.895	259	114	(AG)^9	132	Dinucleotide
HN7TS9H03FGUN5	GCGAAGATCCCAGAAATGGAC	59.809	52.381	6	ATGGTGACGGGATGACTCG	59.933	57.895	312	149	(GT)^8	165	Dinucleotide
HN7TS9H03FH866	GGGCAGCCATAATCAGGAAAC	60.078	52.381	79	ACACCAGGTCTGGGATACAG	59.2	55	390	127	(AC)^9	145	Dinucleotide
HN7TS9H03FHD2I	GCCAGGCATCTGGTAGGTC	60.609	63.158	21	ACCCAAGGTTCTTCTCAAGC	58.485	50	367	275	(CT)^9	293	Dinucleotide
HN7TS9H03FIKCO	AGGAAATGTTTGCAGCTGGG	59.791	50	67	CCTCGGCTAGGAAACGGAG	60.306	63.158	319	202	(GT)^9	220	Dinucleotide
HN7TS9H03FIMNT	AGCCTCCACAGGACCTAAAG	59.493	55	101	ACAGAGATGAGCATCGCCC	60.307	57.895	525	144	(GT)^11	166	Dinucleotide
HN7TS9H03FIPD9	TCAGCACATATAAATTCAGTGGC	58.007	39.13	87	CAGGAAGTGCAGTGTGATCC	59.302	55	437	140	(GT)^9	158	Dinucleotide
HN7TS9H03FK34U	TGATTCTGGTTGTGCCAGC	59.106	52.632	126	AGGTAGATATTCTGACAACTATTCCTG	58.922	37.037	490	391	(AT)^13	417	Dinucleotide
HN7TS9H03FKTNP	AGCCTAGACCTTTCAGGCAC	60.151	55	44	ATTTGCAGGCCACCATGTC	59.477	52.632	418	107	(AG)^9	125	Dinucleotide
HN7TS9H03FMQI8	AGCCAGTGCGGAGACTTAC	60.158	57.895	37	CCTGGTTCTGCCTCTTGGG	60.763	63.158	231	169	(AC)^10	189	Dinucleotide
HN7TS9H03FOHKV	TGGTTGACCAACAATGGCAG	59.721	50	196	TCTTCTTGAAGGTTCTGCATCC	59.089	45.455	459	371	(AC)^10	391	Dinucleotide
HN7TS9H03FQ7VS	CCATACTTGGGAGCATGACAG	59.19	52.381	140	AGAAATCCAAATAGACAAGGGC	57.155	40.909	321	207	(GT)^10	227	Dinucleotide
HN7TS9H03FRU08	GACAGGAACGCTACATGACC	59.1	55	87	GCAAACAAGATGCCTGCAC	58.914	52.632	525	323	(GT)^10	343	Dinucleotide
HN7TS9H03FS2OZ	TCATCCTGACAACAGGCTC	57.506	52.632	3	TTGCCTGCCAAGTGCTATG	59.181	52.632	443	164	(AC)^10	184	Dinucleotide
HN7TS9H03FTDGT	GCTGTGACTAATGCCCGTG	59.645	57.895	7	GCTGCTCCTGGAAGTGAGG	60.831	63.158	272	151	(AC)^10	171	Dinucleotide
HN7TS9H03FTE4F	TGGGATTTCATGTATAACTTTACTGGG	60.013	37.037	13	AGAGCGAGCAATCTACTTCC	57.869	50	406	78	(AC)^8	94	Dinucleotide
HN7TS9H03FTXYT	ACTGTTGTAAGCTGACTTGGG	58.911	47.619	87	CACTCCTGCGTGCCATTTG	60.524	57.895	395	264	(GT)^9	282	Dinucleotide
HN7TS9H03FUQFM	AGGAGAGATTTGGCCTCCAG	59.564	55	5	ACACAGTGGGACGAGGTTC	60.007	57.895	272	112	(AC)^11	134	Dinucleotide
HN7TS9H03FUXAA	TCTTCCAGCTGTCTTAATGGAAAG	59.527	41.667	268	TCCATGTTCAATGCCCAGC	59.174	52.632	561	509	(GT)^12	533	Dinucleotide
HN7TS9H03FV8SG	GCCTCACTTGAATCAGCCC	59.261	57.895	21	TCATCCTGTTGCCGTTGAC	58.817	52.632	213	152	(AC)^11	174	Dinucleotide
HN7TS9H03FVQR3	CATCCCGCCTCCTCTGTAG	59.707	63.158	177	AGAGCCCATGGCTTGTCAG	60.461	57.895	396	327	(AC)^12	351	Dinucleotide
HN7TS9H03FWMHP	TCTGTTTCAAGGCAGCACG	59.419	52.632	103	AGGCTCTGCTCGAAGTGTC	60.158	57.895	294	191	(GT)^10	211	Dinucleotide
HN7TS9H03FYFJJ	GGGTCCAGAGCAAGAACTC	58.207	57.895	21	ACCAGTGTCCCAAGACAGG	59.621	57.895	289	193	(AC)^11	215	Dinucleotide
HN7TS9H03FYG3N	GGGAGAGCTGCAAGGGC	60.837	70.588	72	GCAAAGTGCTCTGGGAAGG	59.486	57.895	364	99	(AG)^9	117	Dinucleotide
HN7TS9H03FYSQB	TGCTGTTTGCGTTTCCCAG	60.01	52.632	424	GCGCATCACCATCTCTGAAG	59.803	55	638	531	(AC)^9	549	Dinucleotide
HN7TS9H03FYVT2	GGGTCCAGAGCAAGAACTC	58.207	57.895	21	ACCAGTGTCCCAAGACAGG	59.621	57.895	290	194	(AC)^11	216	Dinucleotide
HN7TS9H03FZOB7	CCCAACCTACCTCACAGGG	59.775	63.158	250	TCCGGGCGATATCATGGAG	59.479	57.895	502	378	(AT)^8	394	Dinucleotide
HN7TS9H03G1MB6	CCATGGATCTTGCCAAAGCAG	60.622	52.381	41	AGCCTCTTCAGCTGTCCAC	60.082	57.895	378	114	(CT)^8	130	Dinucleotide
HN7TS9H03G2TN4	TGTGCCTCTTTCCTGGAGC	60.385	57.895	52	CGGGTGAGGAGACACTTCC	60.158	63.158	280	186	(AG)^14	214	Dinucleotide
HN7TS9H03G6ODU	GGGATGCTGACAGAAACGTG	59.942	55	44	CCTTCTGCTTGTATGAACAGCC	60.336	50	395	263	(AG)^9	281	Dinucleotide
HN7TS9H03G6QNU	GCATTGTAGGGTGCCCATC	59.332	57.895	371	ATGATAGGTAACGGGCTCTG	57.259	50	582	527	(GT)^12	551	Dinucleotide
HN7TS9H03G6YC8	TCAACCACTTCCAGTTTGACC	59.114	47.619	396	TGGACTGTGGAATGCCTGC	61.063	57.895	564	427	(AC)^12	451	Dinucleotide
HN7TS9H03G77JI	TCTGTCAATGTGGGCCCTG	60.386	57.895	332	TGCTACACCATCACTGCAAG	58.94	50	583	531	(AG)^9	549	Dinucleotide
HN7TS9H03G7GXA	GGTCAGACTAGATGGCCCG	60.008	63.158	155	CACCAGGGATCTCGTACCC	59.63	63.158	432	371	(CT)^10	391	Dinucleotide
HN7TS9H03G8C07	AGGCTCAGGGATGATGTCAG	59.641	55	156	TTGTGATTGTTACGGCTGAAG	57.58	42.857	433	276	(AC)^11	298	Dinucleotide
HN7TS9H03G8R93	TGCACCAGTCGAAGTGTCC	60.678	57.895	286	TCTAAGTAGAAAGAATGTACTTGCC	57.396	36	518	446	(AC)^15	476	Dinucleotide
HN7TS9H03G9371	TGGCTCCATCCCTTGAACC	60.08	57.895	65	AGCAGTCAGGGTTGATCTCC	59.861	55	346	178	(AC)^10	198	Dinucleotide
HN7TS9H03G93FW	CTCTATCCACACATGCTGTACG	59.373	50	9	AGTTCTCCGGATTCGCCC	59.848	61.111	164	44	(AC)^8	60	Dinucleotide
HN7TS9H03GAP8L	TCACGCCTCTGAGTCATCC	59.558	57.895	30	GGTGGGCGATGTAAACTGC	59.937	57.895	415	253	(GT)^14	281	Dinucleotide
HN7TS9H03GAY7H	ATCTGACAGGCCCAGAAGC	60.157	57.895	185	AGTCTGTGCAGAGTTACGAGG	60.215	52.381	429	245	(AC)^10	265	Dinucleotide
HN7TS9H03GBAAP	CTGACAGCGACCAGCTTTG	59.867	57.895	170	AGGGTGATGTGAGCCTTGG	60.08	57.895	447	306	(AC)^9	324	Dinucleotide
HN7TS9H03GBUMR	AAACATGCCTTGTGGAGCC	59.402	52.632	127	AGCACCCTCTATGATGCCC	59.62	57.895	381	315	(AC)^9	333	Dinucleotide
HN7TS9H03GCKVF	AGCGAGTTGGCAATCTTAACC	59.671	47.619	134	TCTACCCTGAAGGAGCCAG	58.462	57.895	346	264	(GT)^10	284	Dinucleotide
HN7TS9H03GCOAY	TCCACCCAGTAGCATGTGG	59.775	57.895	32	GGACTGAAGCCTCATTGGC	59.261	57.895	404	178	(AC)^10	198	Dinucleotide
HN7TS9H03GE687	AGAGGAAGCCCTGAAGCTG	59.775	57.895	21	ATTGGCTGCAACTGTACGC	59.863	52.632	463	412	(GT)^8	428	Dinucleotide
HN7TS9H03GGJBS	CTGGGAAGCTTGTGCCTTG	59.785	57.895	53	TCCATGCTGACAGGTTAGGG	59.86	55	424	90	(GT)^10	110	Dinucleotide
HN7TS9H03GHBWY	ATTGCGCACACTGTTTCCC	60.084	52.632	49	AGTACAAATAATGCTGGCCTCTG	59.57	43.478	205	80	(AC)^8	96	Dinucleotide
HN7TS9H03GIBAC	TTCCAGGACAGAAGCCACC	60.004	57.895	112	ACGAGGGTTGCATGAGGG	60.084	61.111	371	204	(AC)^8	220	Dinucleotide
HN7TS9H03GIPXE	TCATATTGCCACAAGTCATTGC	58.384	40.909	33	AGCTCCATGGTTGAGCAGG	60.461	57.895	198	74	(AC)^10	94	Dinucleotide
HN7TS9H03GJ09H	TGACAGCTCATGATACCTTGC	58.849	47.619	50	CTGAGACTATAAGGTGAAGACTAGG	58.269	44	292	197	(CT)^10	217	Dinucleotide
HN7TS9H03GKJ0N	GCTGCTTTGTCCAGTCGTG	60.158	57.895	104	GGGTGTAGGCATCCTCGTG	60.605	63.158	517	177	(AC)^11	199	Dinucleotide
HN7TS9H03GLT2Y	GGCTCAGTTTCCTCCTGGC	61.134	63.158	106	GACCGTTTGGCAGGCATC	59.855	61.111	462	386	(GT)^11	408	Dinucleotide
HN7TS9H03GLU7S	TCTTCCCTCATCACAGAGGC	59.57	55	41	TTGGAACGAGTTAGTTTCAGC	57.24	42.857	429	213	(AC)^8	229	Dinucleotide
HN7TS9H03GN69L	GTTCTTGAATATTGTTCCCTGTCC	58.571	41.667	48	TTTCAAGCCAAGGTATCAAGTG	57.646	40.909	352	257	(AG)^11	279	Dinucleotide
HN7TS9H03GOFS6	CCCGTCATTCTTTCTCCTTGG	59.398	52.381	37	TGGGCAGCCAATTGCATTATC	60.352	47.619	397	273	(AC)^8	289	Dinucleotide
HN7TS9H03GORJD	GTGCAAGGAGCTCAAGGTG	59.491	57.895	281	TGGTGGTGTTATATCGTTACCAG	58.754	43.478	457	330	(AC)^8	346	Dinucleotide
HN7TS9H03GOSF1	GCAGATATGCCCAGATTACCAG	59.422	50	42	TATGGTGTGAGCCACCTCG	59.857	57.895	450	239	(CT)^8	255	Dinucleotide
HN7TS9H03GP6BZ	GCTTTGCCGTGGCTGATAC	60.304	57.895	68	GCTGTAGACTTGACTGGAACC	59.063	52.381	450	394	(GT)^13	420	Dinucleotide
HN7TS9H03GPPOC	AGCCTGGAGGAAGGTTGTC	59.697	57.895	120	AGCCTTTACAGAGGGCTCC	59.466	57.895	286	198	(GT)^10	218	Dinucleotide
HN7TS9H03GPQR7	TATCAGCGTTCCAAGCAGG	58.288	52.632	25	TCCGAACACAGCCTTCCTC	60.082	57.895	444	63	(GT)^8	79	Dinucleotide
HN7TS9H03GQK2N	AGGGTCCAGAGTGATCCAAG	59.197	55	16	CCACGTTTGCAGGACCAAG	60.084	57.895	258	89	(AG)^9	107	Dinucleotide
HN7TS9H03GR2VI	TTCTGAGCAGGCTTGGAGG	60.081	57.895	8	CAGCACTGTGAAGGGAAGC	59.491	57.895	178	115	(AG)^10	135	Dinucleotide
HN7TS9H03GRJUJ	GTTCTAGCCCAGCCCTTTG	58.878	57.895	28	AACCTAGCAAGCCAACTGC	59.106	52.632	418	261	(AC)^11	283	Dinucleotide
HN7TS9H03GS1P8	GCTCTGCGACAGAAGAACC	59.281	57.895	10	GCAGGTGGCAACATGAAGG	60.158	57.895	351	85	(GT)^15	115	Dinucleotide
HN7TS9H03GSHI7	AGGAACTTTCTTGGTGTAATGG	57.025	40.909	13	GTGTACCTACCATCTAGTATTTCCG	59.093	44	412	238	(GT)^9	256	Dinucleotide
HN7TS9H03GT1YI	ATGGTTTCAAGTGCCCTGC	59.402	52.632	90	CCAGAGTGCTCTTACTGGC	58.294	57.895	481	249	(AG)^11	271	Dinucleotide
HN7TS9H03GT67U	GACAGTGCTTGCCTGAAGAC	59.872	55	36	TGCTGATTTAGTCCTGCTCAC	58.781	47.619	405	290	(AC)^14	318	Dinucleotide
HN7TS9H03GV5LT	CTAAGAACGTCACCACGGC	59.286	57.895	34	CTATGACGCGCTGAAACCC	59.722	57.895	460	117	(AT)^9	135	Dinucleotide
HN7TS9H03GWXI0	GTCTGGACCTGTCCTTGATG	58.361	55	83	AGAGCATTGCAAGTCCCAC	58.801	52.632	237	135	(AC)^8	151	Dinucleotide
HN7TS9H03GX99J	TGACAGCTCATGATACCTTGC	58.849	47.619	50	CTGAGACTATAAGGTGAAGACTAGG	58.269	44	291	197	(CT)^10	217	Dinucleotide
HN7TS9H03GXHKZ	CAACATCGAACTCGCTGGG	59.648	57.895	45	TCCCTACAGGTTGCTCAGG	59.083	57.895	348	266	(CT)^10	286	Dinucleotide
HN7TS9H03GXP2H	CCATGGATCTTGCCAAAGCAG	60.622	52.381	41	AGCCTCTTCAGCTGTCCAC	60.082	57.895	380	114	(CT)^8	130	Dinucleotide
HN7TS9H03GYKPO	GCCAAGAGGGTCCTGACTG	60.459	63.158	123	GCTGGAATGCAACCTGACC	59.86	57.895	426	310	(AC)^8	326	Dinucleotide
HN7TS9H03GYZN5	CTGCTTGAGCTCCGCATTC	60.012	57.895	45	CGGTTTACCCGAAAGCCAC	59.865	57.895	473	173	(AC)^8	189	Dinucleotide
HN7TS9H03GZCTE	TTCTGAGCAGGCTTGGAGG	60.081	57.895	9	TAGCAGGCCAGGCTTAGTG	59.854	57.895	383	116	(AG)^10	136	Dinucleotide
HN7TS9H03GZGPR	CAACATGCTCCACCTTGGC	60.158	57.895	59	TGGGCCATCATTGTATTCGC	59.437	50	357	211	(AC)^8	227	Dinucleotide
HN7TS9H03GZN12	CTCACCTCTTTACCACGGC	58.601	57.895	107	TCCAGGCATTCTCTGGTGC	60.46	57.895	430	183	(AC)^11	205	Dinucleotide
HN7TS9H03HA8SI	GGTACTATGCACTCATACCTTGC	59.703	47.826	0	CCTGCATACAGTTCCTTCAGC	59.741	52.381	340	170	(GT)^9	188	Dinucleotide
HN7TS9H03HARLS	AAAGCACATGTTGGAGGCG	59.786	52.632	5	AGGGAAGCACAATGACTGC	58.801	52.632	426	218	(AC)^14	246	Dinucleotide
HN7TS9H03HASZJ	ACTCCCATTGGATTGTACCC	57.65	50	6	AGCATCTGACATCTCCTGAAATAC	59.164	41.667	326	219	(AT)^8	235	Dinucleotide
HN7TS9H03HAW2O	AGCTGCAATGATGGAATACCC	59.178	47.619	39	CATATGGGATACAGGCCAGC	58.639	55	274	107	(AC)^9	125	Dinucleotide
HN7TS9H03HBEPC	TTCGGAGCTGCCTCCTTG	60.085	61.111	72	TTGCCCAGGACACCCTATG	59.772	57.895	272	141	(AC)^13	167	Dinucleotide
HN7TS9H03HBOPJ	GGTGCCAAACCCATCTGC	59.771	61.111	9	CTTGTGGGCTACGGAACTC	58.601	57.895	458	199	(AT)^10	219	Dinucleotide
HN7TS9H03HC2NP	TGAGCTTGGCACGTTTGTC	59.716	52.632	375	GCATTTGGGATGCAGGGTG	60.232	57.895	555	507	(AC)^9	525	Dinucleotide
HN7TS9H03HCJON	TCATCCTCGATTCTTACACTTAGG	58.379	41.667	10	CTCATGCTTGCAGACAGCC	59.937	57.895	362	93	(AC)^12	117	Dinucleotide
HN7TS9H03HEN6Q	CGCCATTAACAGACCAGCC	59.641	57.895	123	GCAACACAGAGCAGGTAATCC	60.012	52.381	426	235	(GT)^15	265	Dinucleotide
HN7TS9H03HENOO	TAGGAAGGCATCGCCAGAC	59.932	57.895	86	TGTGGAGAGCACCTATTCCG	59.936	55	292	154	(AC)^13	180	Dinucleotide
HN7TS9H03HEQKX	CCCTAATGCTTAGTGCCATGC	60.147	52.381	49	TCCTGGCAAATAACACCTGC	59.216	50	364	114	(AC)^15	144	Dinucleotide
HN7TS9H03HFL7L	AAAGCACATGTTGGAGGCG	59.786	52.632	5	AGGGAAGCACAATGACTGC	58.801	52.632	427	218	(AC)^14	246	Dinucleotide
HN7TS9H03HFS5Z	CCAGCCCTTACTTGTTGCC	59.483	57.895	4	TGCTGGAGCACTTGAACCC	60.987	57.895	354	116	(CT)^10	136	Dinucleotide
HMEZZP203FHUZF	TGGGTGTTGGTCCCATGTC	60.31	57.895	70	CACCCAGAGGCGTATAGTC	57.473	57.895	300	196	(CTGT)^6...(CT)^9	259	Interrupted/Compound Interrupted
HMEZZP203FK2BW	CTCCCTCGGCCAGGAAAC	60.48	66.667	13	TCAGAGTCACACTCCGTGG	59.409	57.895	369	143	(CT)^11...(AC)^11	188	Interrupted/Compound Interrupted
HMEZZP203FNFU7	ATTGTTGTAAGCCGCCCTG	59.183	52.632	93	AGCTGTGGTTTCTGGGCTC	60.688	57.895	340	153	(AATG)^10...(AGAT)^8	227	Interrupted/Compound Interrupted
HMEZZP203GBN0C	AGCCCTTGAGCTTGGTAGG	59.774	57.895	44	GCAAGTATGCATGTGCAAATAGTG	60.252	41.667	365	237	(CT)^8...(CATT)^6	323	Interrupted/Compound Interrupted
HMEZZP203GC4ZQ	ATGAGTCCGCATGGATTGC	59.036	52.632	53	ACGGATGCTGTGTCTTCAG	58.221	52.632	270	187	(CT)^10...(AC)^10	228	Interrupted/Compound Interrupted
HN7TS9H02C2VTS	AGTAGAAGTGAGAACCAAAGGC	58.758	45.455	22	TTCGGAGGCTGGGAATCAG	59.854	57.895	424	54	(GT)^8...(AG)^12...(AGAGG)^6	133	Interrupted/Compound Interrupted
HN7TS9H02C367Z	CATAAATTTGACAGAAACAGCTTGG	58.418	36	113	ACAAACAACAGGTTGAATGGC	58.579	42.857	425	192	(CT)^8...(AC)^11	231	Interrupted/Compound Interrupted
HN7TS9H02C3WUZ	CCTCTTTGGTTTGGGAGGC	59.098	57.895	102	GTTTGGAGAAGGGTGGGAAC	59.143	55	407	339	(CT)^10...(AC)^9	378	Interrupted/Compound Interrupted
HN7TS9H02D7D4V	GGGCCATGAACATGATCGG	59.412	57.895	79	GACTGAGTGCCCAAACTGC	59.788	57.895	415	186	(ATCT)^6...(AGAT)^8	291	Interrupted/Compound Interrupted
HN7TS9H02DA69M	TTGCAGCTCTATGTTCAAGC	57.17	45	209	AAGACTATCGCAGCCACGG	60.602	57.895	466	265	(AG)^8...(AC)^13	315	Interrupted/Compound Interrupted
HN7TS9H02DBDPQ	GACGATGGAACATTCCTGTGG	59.742	52.381	23	TGCTGTACAATGAAGCCATTAG	57.527	40.909	353	251	(CT)^10...(AC)^10	292	Interrupted/Compound Interrupted
HN7TS9H02DHQ38	GAAGTGAGTGGGCAGGATG	58.583	57.895	32	TCCAGGGTCATTGCAGGAG	59.774	57.895	434	190	(ATCT)^7...(ATCT)^10	261	Interrupted/Compound Interrupted
HN7TS9H02DKE7X	GACTGAGTGCCCAAACTGC	59.788	57.895	262	GCTTTGCATGGCTGGTCG	60.548	61.111	457	374	(AT)^10...(ATGT)^7	420	Interrupted/Compound Interrupted
HN7TS9H02DKELR	AGCAACATCTGCTGCCTTG	59.485	52.632	0	GAGATTTCCTGGATGTGTAGAGG	58.814	47.826	435	274	(AGAT)^10...(AGAT)^7	380	Interrupted/Compound Interrupted
HN7TS9H02DKHG8	GCACAAAGCTAGTGCTGAGG	59.942	55	70	TGTTGGACAAGGTACACTTAATGC	60.254	41.667	486	272	(AAT)^6...(ACC)^6	318	Interrupted/Compound Interrupted
HN7TS9H02DMMNE	CCGGACTTGCCATGGTTTG	60.158	57.895	215	TCGTATGGCTGAACGGAGG	59.934	57.895	478	332	(ATGC)^7...(GCAT)^7	362	Interrupted/Compound Interrupted
HN7TS9H02DR21Y	GCATATTGCCCGTGTAAGGC	60.433	55	168	CACTGTATTGTCGCCAACCTC	60.013	52.381	522	341	(AAGG)^10...(AAGG)^8	417	Interrupted/Compound Interrupted
HN7TS9H02DWWA2	GGGCCATGAACATGATCGG	59.412	57.895	79	GCTCTCTTGAGGCTGGGAC	60.532	63.158	470	186	(ATCT)^6...(AGAT)^8	291	Interrupted/Compound Interrupted
HN7TS9H02EAQHT	ACCTGCAAAGGACAGGCTC	60.688	57.895	170	CAGAATTCACTGGCCGCAC	60.231	57.895	454	272	(CT)^10...(AC)^10	315	Interrupted/Compound Interrupted
HN7TS9H02EAS7Y	CTGGGTTTGCAAGACAGCC	60.083	57.895	116	GGACCGTAGTAACCACCCTTAC	60.599	54.545	472	181	(GT)^12...(AGC)^7	388	Interrupted/Compound Interrupted
HN7TS9H02EH91C	AGGGTACCACTGAGCCAAG	59.39	57.895	67	TGGAGGCCATTCATCCTGC	60.539	57.895	318	162	(CT)^11...(AC)^10	205	Interrupted/Compound Interrupted
HN7TS9H02EHQI8	GTTCCACTCAAAGCGCAGG	60.158	57.895	357	GGGTTTACGTATTCCTAGTTGTCC	59.655	45.833	570	406	(CTGT)^6...(AC)^11	467	Interrupted/Compound Interrupted
HN7TS9H02EJQ3V	GCCATGCATATCGTGAGCC	59.864	57.895	43	GACCTAGTGCCCAAACTGC	59.189	57.895	394	137	(AC)^12...(AT)^9	273	Interrupted/Compound Interrupted
HN7TS9H02EVB7Y	TAGACTCGGGCTTCTTGGC	59.856	57.895	2	GACTGACCCTGGAAGGTGG	60.081	63.158	427	37	(CTGT)^8...(AC)^8	106	Interrupted/Compound Interrupted
HN7TS9H02EXQ31	ATGCCATCTGGCCTCTACC	59.62	57.895	68	GAGCAAGAAGCCCTTGCAG	59.861	57.895	424	142	(AAGG)^14...(AAGG)^15	259	Interrupted/Compound Interrupted
HN7TS9H03F3VMC	ACCTGCAAAGGACAGGCTC	60.688	57.895	170	CAGAATTCACTGGCCGCAC	60.231	57.895	453	272	(CT)^10...(AC)^10	315	Interrupted/Compound Interrupted
HN7TS9H03G85BQ	TGTCAGGGTGCAGGACTTC	60.006	57.895	42	TGCTGATGAGCCGTCTTCC	60.531	57.895	302	109	(AC)^12...(AGG)^9	273	Interrupted/Compound Interrupted
HN7TS9H03GGSTV	TGCCCAAAGCAGGAGTGTC	60.987	57.895	72	TGGATCTTCAGCCAGCGTG	60.829	57.895	287	127	(AGTT)^7...(AGAT)^10	197	Interrupted/Compound Interrupted
HN7TS9H03GHBY8	AACAAACTGGCCTGGTTCC	58.94	52.632	9	GGCAGCGATAAACCACAGC	60.304	57.895	410	247	(GGAT)^6...(AG)^9	299	Interrupted/Compound Interrupted
HN7TS9H03GWXVN	GAGAGCAACAAGTTGGCCG	60.158	57.895	196	CAGCCGACTTCGCAGAATG	60.014	57.895	424	231	(CGCT)^7...(GCT)^6	346	Interrupted/Compound Interrupted
HN7TS9H03GX6ZZ	CCAAGACCTACTCTGTAAAGCC	58.9	50	81	GCCAGCTTTGAGGATGGAC	59.261	57.895	289	134	(AC)^9...(AG)^11	176	Interrupted/Compound Interrupted
HN7TS9H03GZW8K	CTGTGTCTTTGCCATTAGCATTC	59.336	43.478	118	TAACAGTCTCCTTGCTGCG	58.226	52.632	552	181	(ACAG)^7...(AGGG)^6	271	Interrupted/Compound Interrupted
HN7TS9H03HDAK6	GGGCCATGAACATGATCGG	59.412	57.895	79	GACTGAGTGCCCAAACTGC	59.788	57.895	414	186	(ATCT)^6...(AGAT)^8	291	Interrupted/Compound Interrupted
HMEZZP203FKZ7N	CTGTCGAAGCACCTTGTCC	59.202	57.895	54	CCCTTGGCCCTAAACAAAGC	60.152	55	269	124	(AAACC)^6	154	Pentanucleotide
HMEZZP203FTSHI	CTGTCGAAGCACCTTGTCC	59.202	57.895	53	TACCCACTGCTCCCAAAGG	59.696	57.895	300	100	(AAACC)^11	155	Pentanucleotide
HMEZZP203FUXNY	GACCATCTTTGCAATGGTTTCAG	59.518	43.478	69	GCAACCGTATCAAGGTCTTTCC	60.336	50	270	113	(CTTTT)^6	143	Pentanucleotide
HMEZZP203FVDOY	TCAAAGGACACCCTTGCCC	60.616	57.895	66	AGTCTGAAAGTTTACGAAGACAGG	59.475	41.667	332	267	(ATCCC)^6	297	Pentanucleotide
HMEZZP203FZR2K	GCCTGAGGACAAACACTGG	59.113	57.895	23	GTGTTCGTGAACCCAGCTC	59.499	57.895	412	163	(GTGTT)^6	193	Pentanucleotide
HMEZZP203FZRLA	AGCCTCCATTGGGTACCTG	59.462	57.895	151	GAAGTGAGTGGGCAGGATG	58.583	57.895	368	244	(ATTTT)^14	314	Pentanucleotide
HMEZZP203G6E13	AGAGGGCTTTCTGCCTGAC	60.081	57.895	289	GGCAGGGTCTGATCTCCAG	59.93	63.158	467	325	(CCATT)^6	355	Pentanucleotide
HMEZZP203GI3SY	ATACCTTGTATTGGGTTCGTAGAC	58.862	41.667	5	AAGTACACATATAGGACATCATTGGC	59.845	38.462	154	54	(AATAC)^6	84	Pentanucleotide
HMEZZP203GJU15	AACAAGGCTCTCCTTGGGC	60.691	57.895	46	GAAGCCACACTCCTGGTTG	59.113	57.895	295	106	(AGGGG)^6	136	Pentanucleotide
HMEZZP203GLDD0	CACTTATGCGCCCTTTCGG	60.012	57.895	64	CCAAGCTGGAATTTCTCTTGAC	58.324	45.455	249	179	(GCCCT)^6	209	Pentanucleotide
HMEZZP203GM6GE	GGGAGAACTGACCTTGGGC	60.762	63.158	145	CCCGAAGAACAGGGAGTTTC	58.942	55	364	268	(AGGGG)^8	308	Pentanucleotide
HMEZZP203GSHAV	TCTCCCATTCCCGCTAGAC	58.939	57.895	85	ACCATCACAGTAGGTGCTATTTC	59.001	43.478	338	185	(GCTTT)^12	245	Pentanucleotide
HMEZZP203HB31L	GACTGGGAGGACTGTAGCC	59.553	63.158	77	GATGTGCATGCCTGGAACC	59.934	57.895	329	153	(AAAAT)^9	198	Pentanucleotide
HMEZZP203HDX7E	AGCCTCCATTGGGTACCTG	59.462	57.895	151	TGTGGTGATCTTGGAGCCC	60.081	57.895	432	244	(ATTTT)^15	319	Pentanucleotide
HN7TS9H02C19OH	CTCCGTCTTCTCGGCAAGG	60.893	63.158	204	CACGCCAGTGAGAATCAGC	59.647	57.895	500	321	(AGAGG)^14	391	Pentanucleotide
HN7TS9H02C2Z0M	AAGCTGGGACTTCACTGGC	60.688	57.895	24	GCCCTCAGAATCAACGTGTC	59.662	55	350	164	(AGAGG)^12	224	Pentanucleotide
HN7TS9H02D1OVJ	AGCCAGTGACAGCTCTTCC	60.082	57.895	168	CTCACCATGACAGACAATTGGG	60.011	50	461	374	(AGAGG)^10	424	Pentanucleotide
HN7TS9H02D8AV8	ATTGGACCCAGTGGCCTTC	60.387	57.895	89	CCCGAGGCTGTTGCGAG	61.224	70.588	370	297	(ATTTT)^6	327	Pentanucleotide
HN7TS9H02DAMXN	AGTCCATCCCTGTGCATTTC	58.629	50	119	CCCATGTAGCCCTGTAGGC	60.309	63.158	389	207	(AACAT)^13	272	Pentanucleotide
HN7TS9H02DANOG	GTGACTGCCTTCCAATGCG	60.231	57.895	232	CCACCACTGAAAGTTCTGGC	59.797	55	637	445	(AAACC)^12	505	Pentanucleotide
HN7TS9H02DQPKE	TTACAACCCGTGGGTCCAG	60.005	57.895	39	GTTGGGCAGAAAGCTGAGG	59.486	57.895	240	153	(AGGGC)^8	193	Pentanucleotide
HN7TS9H02DQZTV	GGATCCTGCTGAACAAAGCC	59.939	55	84	TCCCTGGTAACTTGCTCCC	59.387	57.895	483	370	(AAGGG)^10	420	Pentanucleotide
HN7TS9H02DWF3S	CACTTGCAATCCCTTGGGC	60.158	57.895	255	AGTCACTGCACCGCTAACC	60.753	57.895	620	509	(AGGGC)^8	549	Pentanucleotide
HN7TS9H02EC8MA	GGAGTGGGTTGCTGTTTCC	59.409	57.895	85	AGTCCCTCCCACTTTGCAG	60.004	57.895	533	280	(GCCCT)^9	325	Pentanucleotide
HN7TS9H02EEP2A	CCTCCTGGGAAGTACGCTC	59.933	63.158	120	ACCATGGAGCAAATCCATTCC	59.381	47.619	546	442	(AAGCC)^8	482	Pentanucleotide
HN7TS9H02EH7MG	GCATAGACCCACCTGGGAG	59.929	63.158	41	CTGGCGCTGACACATTCC	59.548	61.111	469	322	(AGAGG)^14	392	Pentanucleotide
HN7TS9H02EJRZB	CTCCCTGCTGTCCCATACC	59.929	63.158	236	ACTTCCTGGAGAGGGCAATC	59.859	55	555	420	(AGCCC)^6	450	Pentanucleotide
HN7TS9H02EK20X	AGGGCTCCAGTTCTCCAAAG	60.078	55	269	GAGGAGTCTTGGCCAGTCG	60.529	63.158	640	483	(GGCAT)^7	518	Pentanucleotide
HN7TS9H02EQ47X	AGTAATGACCTAGCCTCTGC	57.179	50	437	ACGCCAATTAATCCTTCCAAC	57.614	42.857	600	517	(CTTTT)^9	562	Pentanucleotide
HN7TS9H02EQF9S	AACAGCCGGATCAAACTGC	59.488	52.632	208	TGAAGACTCCACACTGGGC	60.006	57.895	484	249	(AGGGG)^6	279	Pentanucleotide
HN7TS9H02ERIRV	GATCCTGGAACTCGCCACC	60.903	63.158	38	AAGTGATGCAGATGTCGCC	58.97	52.632	373	188	(GCCTT)^16	268	Pentanucleotide
HN7TS9H02ETMG6	GTGCTCATCGTGAAGTGCC	59.94	57.895	147	TCTCGGCAAAGGTCATCCC	60.157	57.895	458	339	(AAGGC)^12	399	Pentanucleotide
HN7TS9H03FKG30	AGATAGGCTGGGCATCCAC	59.62	57.895	85	TGTGAGCCAGTGAAGTTGC	59.039	52.632	434	224	(AACAT)^8	264	Pentanucleotide
HN7TS9H03FRV0B	CCATCCAGAGACCCACAAGG	60.513	60	113	ACCCAAAGATACATTGCAAGTCC	60.011	43.478	416	156	(AATAG)^6	186	Pentanucleotide
HN7TS9H03FTN9Q	CCATCTCCAGGTGCTCAGG	60.233	63.158	324	ATGCAGGCCCTCTCATTGG	60.54	57.895	504	371	(AAGGG)^8	411	Pentanucleotide
HN7TS9H03FV24D	GCAGCCATCCTCTCCGAC	60.632	66.667	22	GGACCGTAGCTCCCATCAG	60.008	63.158	382	249	(AGCCC)^8	289	Pentanucleotide
HN7TS9H03FVRXD	GTGGCAACATTAGCAATGAAGG	59.239	45.455	153	GGTCGCGATGGGTCAGATG	61.331	63.158	508	227	(CATTT)^7	262	Pentanucleotide
HN7TS9H03G0RYS	GGGCCCAGAGTACAACAGG	60.46	63.158	14	CTGTGACCTTGCAGGAACTC	59.231	55	423	258	(AGAGG)^8	298	Pentanucleotide
HN7TS9H03G3JZ1	GCCTTCAGAGTCCAGGCAG	60.831	63.158	10	GTTAAAGAGCAGCCCGTCC	59.271	57.895	268	157	(AGAGG)^14	227	Pentanucleotide
HN7TS9H03G3VYJ	AGGCATGTCTTCGCCTG	57.594	58.824	11	CTAAACACTGCCTGCACCC	59.488	57.895	277	50	(AGAGG)^11	105	Pentanucleotide
HN7TS9H03GC5ZB	TGCCGCTTCCAGTTCAGG	60.715	61.111	101	CTGCTACCCACACTAATTTAAGAC	58.099	41.667	250	135	(ATATT)^7	170	Pentanucleotide
HN7TS9H03GG5QC	ACAACTTTGTTCTTTACAGCTTGC	59.659	37.5	156	TCTCTCAGCTTGCCCACAG	60.082	57.895	496	246	(AATAC)^12	306	Pentanucleotide
HN7TS9H03GOSA2	CCCTGAAATTCCATCAACCTG	57.603	47.619	87	GGAGGCACAAGTATGAAGACC	59.124	52.381	446	212	(AATGG)^9	257	Pentanucleotide
HN7TS9H03GVL9S	GAGATCAGCTTGGGACGAG	58.082	57.895	151	GTTGTCCTTGAAGTTCTGCG	58.063	50	511	452	(AAACC)^6	482	Pentanucleotide
HN7TS9H03GXDJQ	TCTGGATTGGGCCGTCTTC	60.157	57.895	33	CCTCCTGGGCCATCTAGTC	59.318	63.158	248	74	(CCATT)^7	109	Pentanucleotide
HN7TS9H03HAK6M	CTGCACTCCACGGACTTTG	59.497	57.895	39	GATTCCGACTTGCAGACGC	60.014	57.895	443	168	(CTTTT)^7	203	Pentanucleotide
HN7TS9H03HEOVL	TGCCATCTACACGCAGGAG	60.232	57.895	29	GATGCAGCAACGGTCAAGG	60.231	57.895	350	205	(AAGGC)^8	245	Pentanucleotide
HMEZZP203F11D6	AAACGGGCATCGGTCTGG	60.793	61.111	184	CCAAGACTTCAGTAATGGGACAATC	60.419	44	405	346	(ATTT)^6	370	Tetranucleotide
HMEZZP203F2JBX	GGACAAGGTGAAGGGACCG	60.757	63.158	65	ACTGCTCAGAGAGCTTTGG	57.82	52.632	337	271	(ATTT)^7	299	Tetranucleotide
HMEZZP203F514Y	GACTGAGTGCCCAAACAGC	59.788	57.895	261	AGTCACTACTTGCCTGAGC	57.522	52.632	454	380	(ACAT)^6	404	Tetranucleotide
HMEZZP203F5O5F	CCACCTAGTTTCGGATGGTG	58.727	55	42	ATCACCAGGTCAGAGGTGC	59.777	57.895	197	112	(ATGT)^6	136	Tetranucleotide
HMEZZP203F5YF8	AAACGGGCATCGGTCTGG	60.793	61.111	184	TCCAAGACTTCAGTAATGGGAC	58.218	45.455	408	348	(ATTT)^6	372	Tetranucleotide
HMEZZP203F7GW6	TCACTGAGCTACGCAAGCC	60.823	57.895	149	CCGGGTTGCAGCTGGATG	61.879	66.667	432	335	(AAGT)^8	367	Tetranucleotide
HMEZZP203F99QV	CAGCCATTCCAAGTGCAGG	59.859	57.895	17	CATACGTTGCAGGAGGTGC	59.645	57.895	284	64	(CTGT)^8	96	Tetranucleotide
HMEZZP203FJT1U	CCGTCCCACTTAGGAACCC	60.157	63.158	1	CGGAATGAGCGTCAGCAAG	60.014	57.895	350	138	(AAGG)^9	174	Tetranucleotide
HMEZZP203FKSUI	GCATCCTAGCCGAGCATTTC	59.872	55	76	GGTCCCTCTGGAAGTTGGG	60.081	63.158	380	136	(GGAT)^6	160	Tetranucleotide
HMEZZP203FLR5H	CCCTAGGTGGGAGCTAGAATATG	60.009	52.174	2	CTCGCCCACTGCAAGATAC	59.054	57.895	179	65	(AGGG)^10	105	Tetranucleotide
HMEZZP203FLVN6	CCGCTCGGTGATGAGGG	60.253	70.588	9	CGCAGTGCCGGAATTATAGC	60.222	55	376	43	(AGAT)^9	79	Tetranucleotide
HMEZZP203FNDPD	CAGTGCGGACACATTCCTG	59.57	57.895	58	GCCTTGAGCCCTCTGTAG	57.474	61.111	448	392	(GATT)^6	416	Tetranucleotide
HMEZZP203FO3WN	TGGTTCGGCAGAATTCCTTG	59.222	50	3	AGGGCCTTCTCTTTGGCAG	60.387	57.895	413	88	(ATTT)^6	112	Tetranucleotide
HMEZZP203FOXLV	GGATGTAAGCCACTTGGAGTTC	59.751	50	46	AGTACTGAGCCCTGCTTGC	60.459	57.895	330	93	(AATG)^9	129	Tetranucleotide
HMEZZP203FPNOF	CGACTGTGGCGAGGAAATC	59.356	57.895	54	CTGCTTTGCAAGGTGGCTC	60.453	57.895	272	112	(GCCT)^7	140	Tetranucleotide
HMEZZP203FQR59	TACGTCTTGGATGGCCCTG	59.854	57.895	105	GGCAGCATAGAAATGCCTCG	60.152	55	285	218	(ATCT)^9	254	Tetranucleotide
HMEZZP203FQSKW	CGACTGTGGCGAGGAAATC	59.356	57.895	54	CTGCTTTGCAAGGTGGCTC	60.453	57.895	272	112	(GCCT)^7	140	Tetranucleotide
HMEZZP203FVSL5	GTCAAAGGGTTACAGCTGAGG	59.33	52.381	37	TGAGGCTCTTGTGCGATGG	60.829	57.895	198	118	(ATTT)^11	162	Tetranucleotide
HMEZZP203FX16A	TGTCACTAGCCTAACTGCCG	60.223	55	35	TCTCATACCTACATGGACTCAAG	57.658	43.478	342	163	(ATCT)^7	191	Tetranucleotide
HMEZZP203FXMQU	GGCTGGTCCAAGTCTACCC	60.157	63.158	147	CCCTGGTTCACTGAGCATC	58.583	57.895	364	278	(GATT)^8	310	Tetranucleotide
HMEZZP203G02NN	GCCATAGACTGGGAAGCTC	58.053	57.895	0	CACCTCATTCCGTCCAGGG	60.533	63.158	284	39	(GGAT)^8	71	Tetranucleotide
HMEZZP203G2D2V	GACCTTGTTGTAAGCTGCCC	59.868	55	8	GGAACTCTGGGAGAGCTGG	59.855	63.158	186	70	(AATG)^8	102	Tetranucleotide
HMEZZP203G3BSH	CCATGGGTACTTATTCAGAACAGC	60.193	45.833	50	TCCAGTTAGGTATCTTCAGTTCTCC	60.129	44	271	139	(ATTT)^6	163	Tetranucleotide
HMEZZP203G7S4P	TGGTTCGGCAGAATTCCTTG	59.222	50	3	GGTCGAGTAAGTGCCACAG	58.612	57.895	254	88	(ATTT)^6	112	Tetranucleotide
HMEZZP203G8IX5	TGGGTTAGCTTAAATCTGGATGG	58.988	43.478	3	ACCCTATGTGGCTTGGGAC	59.772	57.895	398	110	(ACAT)^7	138	Tetranucleotide
HMEZZP203G9WVQ	GTCACACAGTTCTTTAGTCATGC	58.726	43.478	32	TTTGCTGCCCACTGCAAC	59.929	55.556	426	65	(AGAT)^11	109	Tetranucleotide
HMEZZP203GBSVB	TGTTTCAAGAAAGCTGGTAGTTG	58.263	39.13	60	AGGCCACCTTTGGTAACAG	58.017	52.632	237	95	(AAGG)^13	147	Tetranucleotide
HMEZZP203GHPX7	TGTAAGCTGCCTTGAGCCC	60.762	57.895	34	CTTCTCCTGCGTGGAGTTC	58.608	57.895	393	93	(ACAT)^8	125	Tetranucleotide
HMEZZP203GHTGU	CCGGAGATGCATAGTGATTGG	59.333	52.381	85	TGCTCCATGAATGTTTCTGATAG	57.429	39.13	241	125	(AAAT)^6	149	Tetranucleotide
HMEZZP203GJ6QZ	CTTCAGCTTGAGAGCCTGC	59.271	57.895	132	ACATTTGTAAGCCGCCCTG	59.183	52.632	316	214	(ATCT)^11	258	Tetranucleotide
HMEZZP203GJE83	TGAACCGAGTGACCTCCAG	59.403	57.895	20	ATGGAGACTGCAGACCAAG	57.499	52.632	299	153	(AAAT)^7	181	Tetranucleotide
HMEZZP203GK1ZC	AGCCCTGAAAGGGTGGAAG	60.003	57.895	316	GGGTCACGATGGGTCAG	57.266	64.706	502	447	(GTTT)^6	471	Tetranucleotide
HMEZZP203GLCE8	AGGGAAGCATTGGATGGC	58.067	55.556	94	CAAGTGTTTGCACTGATGGC	58.964	50	292	132	(AATG)^9	168	Tetranucleotide
HMEZZP203GMQUM	AACAAGGCTCTCCTTGGGC	60.691	57.895	45	GAAGCCACACTCCTGGTTG	59.113	57.895	286	102	(AGGG)^7	130	Tetranucleotide
HMEZZP203GNZG4	AAACGGGCATCGGTCTGG	60.793	61.111	184	CCAAGACTTCAGTAATGGGACAATC	60.419	44	405	346	(ATTT)^6	370	Tetranucleotide
HMEZZP203GSJOP	AAAGGCCTGTACCCAGAAC	57.708	52.632	170	CAAGGCTCTTGTGCGATGG	59.938	57.895	453	377	(ATTT)^8	409	Tetranucleotide
HMEZZP203GU6T5	GTGCAGCCCAGAGACATTC	59.267	57.895	220	CAGCAGTAGCCAAAGGGTG	59.187	57.895	460	332	(AGGG)^9	368	Tetranucleotide
HMEZZP203GUF7S	GGTCCCAAGGGTACCAACC	60.386	63.158	154	GTCCACTCAAGTCCAACAGC	59.516	55	318	252	(GTTT)^6	276	Tetranucleotide
HMEZZP203GV3ND	ACCAGACAGGAGTGCTTGG	60.005	57.895	66	CAACCACTGACTTGCAGCC	60.084	57.895	303	199	(AGGG)^10	239	Tetranucleotide
HMEZZP203GWQ97	TCATCTGGATGCAGTAGTCTTTGG	61.162	45.833	4	AAATTGCTTAGGGCAATGACAG	58.303	40.909	153	79	(AAAT)^6	103	Tetranucleotide
HMEZZP203GXP2Z	AGCCTTGTCTGTTGGGCAG	60.99	57.895	72	TGCTTCACTAATTGCTCTGGG	59.048	47.619	254	103	(GGAT)^9	139	Tetranucleotide
HMEZZP203GXSBX	TCTGTGTGGGAAGGAGCAC	60.006	57.895	46	TGCTGTAAACTGTCCCGAG	57.839	52.632	369	289	(ATTT)^8	321	Tetranucleotide
HMEZZP203HACVZ	AAGCTGACCCGAGGCTATG	59.931	57.895	332	AAACCCAATCATGCAACCC	57.108	47.368	486	377	(AATG)^7	405	Tetranucleotide
HMEZZP203HBUBI	GCTCCTCAATTCCTGCCAC	59.261	57.895	117	TTTGGGCTACAGCCAGAGG	60.081	57.895	439	319	(AGAT)^9	355	Tetranucleotide
HMEZZP203HDSF7	AGGGAAGCATTGGATGGC	58.067	55.556	94	CAAGTGTTTGCACTGATGGC	58.964	50	293	132	(AATG)^9	168	Tetranucleotide
HN7TS9H02C005P	CCCAGAGAACTTCAGCTAATGG	59.225	50	345	AAGCCACTCGTTCTTGACG	58.835	52.632	792	402	(AGAT)^8	434	Tetranucleotide
HN7TS9H02C00SD	TGGTGCCTCCTGATTCCAC	60.081	57.895	48	TTTCCTCCCTGCTTGGGTC	60.003	57.895	403	163	(ATCC)^8	195	Tetranucleotide
HN7TS9H02C07KL	ACTGGCAGCTTGGATCCTC	60.157	57.895	300	GCAGGCCAAGGAGAATTGC	60.232	57.895	541	462	(AATG)^6	486	Tetranucleotide
HN7TS9H02C0KPI	GTGCTTGTTGTAAACCATCCTG	58.852	45.455	35	CAGTTTCGCCCACATTCCC	59.861	57.895	319	105	(AATG)^8	137	Tetranucleotide
HN7TS9H02C12PZ	TTGGAGCAGAACATGGTGC	59.106	52.632	355	CCAAGGCTGTTGCGAGGG	61.8	66.667	651	588	(ATTT)^7	616	Tetranucleotide
HN7TS9H02C1RRC	AGGCCTGGTTGAAGTCTGG	60.004	57.895	112	GGTATGGCTGTACTGTTAGGTC	58.705	50	301	166	(AGAT)^13	218	Tetranucleotide
HN7TS9H02C2D9Z	TGGATGCATGGCACTATGAAG	59.185	47.619	3	CAAGAAATGGCCGAGCAGG	59.936	57.895	380	70	(GCTT)^6	94	Tetranucleotide
HN7TS9H02C2TOJ	TCGGGCACAGAAACATTTG	57.178	47.368	220	GGTCATGCGCAATGGAAGG	60.305	57.895	507	321	(GGAT)^6	345	Tetranucleotide
HN7TS9H02C2UI5	CACTGCACAGCTCACTTCG	59.869	57.895	18	CTTTGGGAACCCTCCGTTG	59.108	57.895	450	90	(CATT)^9	126	Tetranucleotide
HN7TS9H02C3LOK	GGTGTACGGACTACCCTTCC	59.937	60	225	TTTGTTGTGAGCTGCCCTG	59.333	52.632	381	281	(ATTT)^11	325	Tetranucleotide
HN7TS9H02C3QBJ	GGGAAAGGAGGCATGGTG	58.408	61.111	0	GGGACTCAGACAACCTGGG	60.081	63.158	232	35	(ATGT)^7	63	Tetranucleotide
HN7TS9H02C50VV	GTGTGGCAAAGCCCATCTG	60.158	57.895	84	AGTCACAGCTTCTCAGCCC	60.082	57.895	337	198	(ATCT)^6	222	Tetranucleotide
HN7TS9H02C57IZ	GCCATTGTGGTCGCTTCTG	60.231	57.895	29	CAGGTTGTGCATCCCTGTTG	60.152	55	417	233	(ATTT)^7	261	Tetranucleotide
HN7TS9H02C59WE	ACTCCAGTTTACCTCTATCCCAG	59.495	47.826	46	GGCTTCAGTGCAACAGTCC	59.788	57.895	439	168	(AAGG)^10	208	Tetranucleotide
HN7TS9H02C5OT9	TCTCTTTAGCTGTGGAGCAG	57.709	50	152	AGGGTAAAGGGTCTGTGGC	59.695	57.895	560	190	(AGAT)^8	222	Tetranucleotide
HN7TS9H02C5Q5W	TTGGTTGCCTGAAGAACTTG	57.21	45	70	GAGGCAGACACCTCAAGGG	60.459	63.158	228	127	(CTGT)^6	151	Tetranucleotide
HN7TS9H02C5T17	ACATGGAGAGGACCAAGGC	59.774	57.895	384	TTTGTGGCTGCCCATTGAC	59.706	52.632	717	561	(AGGG)^7	589	Tetranucleotide
HN7TS9H02C6SHE	CGAGGCTTTCTGCAATGGG	59.936	57.895	244	CTCTCAGCCACAGGGATGG	60.233	63.158	477	290	(ATGT)^6	314	Tetranucleotide
HN7TS9H02C6SQX	TCACCTCCCATCAGCCTTG	59.774	57.895	226	GGGTGTGCATTGAAGCAGG	60.158	57.895	498	287	(AGAT)^13	339	Tetranucleotide
HN7TS9H02C6YMJ	AGTTGGTCATAATCCACTGAAAGG	59.523	41.667	125	ACCCTGATTTGCCAGGGTC	60.387	57.895	531	178	(AAAT)^7	206	Tetranucleotide
HN7TS9H02C7VT4	ACTAAACCGCCCTGAGCAC	60.757	57.895	401	GGTGTAGACAAACAGACATGGTATC	60.187	44	560	455	(AAAT)^6	479	Tetranucleotide
HN7TS9H02C8FQZ	GTGCATGACCAAGCCTATCC	59.44	55	111	CCCAACCTACCTCACAGGG	59.775	63.158	352	225	(ATTT)^7	253	Tetranucleotide
HN7TS9H02C9LAA	AGGTGTCCATCCGCTCAAG	60.157	57.895	31	GTGCTCATCAATGGCCTGC	60.306	57.895	480	331	(ATTT)^9	367	Tetranucleotide
HN7TS9H02CY14V	TCGGCTACATAGCTCTGCG	60.084	57.895	32	TGCTACCTGAGCATGGGTC	59.854	57.895	301	108	(AAGG)^10	148	Tetranucleotide
HN7TS9H02CY74Y	CCTGCCAACCTTGCAGTTC	60.083	57.895	64	GCTGCCAGAAACAGTAGGC	59.566	57.895	511	332	(CATT)^10	372	Tetranucleotide
HN7TS9H02CYLYE	TGAGGTGGTGTTGACTTGC	58.656	52.632	50	TGGACACATTCCTCCAGGC	60.081	57.895	399	90	(GCTT)^6	114	Tetranucleotide
HN7TS9H02CZ1TR	CACCGAAGTGCACAGAACG	60.159	57.895	118	GGCCATTTCACCCACGATG	59.935	57.895	567	415	(AGGC)^7	443	Tetranucleotide
HN7TS9H02CZYKY	AGAAGAGCCTTGAGCAGCC	60.46	57.895	73	GAGGAACAGTTTGTCACGC	57.606	52.632	265	116	(AGGG)^7	144	Tetranucleotide
HN7TS9H02D0GJJ	CTTTGGCGTTGTGAGCCG	60.468	61.111	1	TGGGCACATTGACAGCATTC	59.866	50	283	60	(AAAT)^9	96	Tetranucleotide
HN7TS9H02D0V6T	TTGCCACGTCTATCCTGTAG	57.504	50	2	CCCGGGAGTATTCAGCCC	59.925	66.667	349	258	(AAAT)^6	282	Tetranucleotide
HN7TS9H02D1M7H	GCTGCTGCCAATCACAACC	60.82	57.895	258	ACCATTCCAGCGGTCTTCC	60.46	57.895	527	423	(AAAT)^7	451	Tetranucleotide
HN7TS9H02D1P14	CCCTACATTTCCTGGCCTTC	58.704	55	30	CAACTGGGTGACTTTGGGC	59.709	57.895	214	63	(CATT)^6	87	Tetranucleotide
HN7TS9H02D2FAB	TGACTCTGCTCACTCGGAAG	59.868	55	138	CCATGGAAGGATTTGTGCGG	60.294	55	403	314	(GGAT)^8	346	Tetranucleotide
HN7TS9H02D2FGD	CTGGCTAGACATTGTAGCAGTC	59.302	50	49	GGCCTCAAAGCACACCTTG	60.083	57.895	363	183	(CTGT)^9	219	Tetranucleotide
HN7TS9H02D2U4A	AAGGCTTGTTTGCGATGG	57.026	50	51	GAGTGCCGGGTTCCATTTG	59.861	57.895	213	97	(AATG)^12	145	Tetranucleotide
HN7TS9H02D2WKL	AGATATCCATAGTTCAGCTTTCTAGC	59.17	38.462	166	ACTAACACTACAGAATTGCCACC	59.445	43.478	431	347	(GCTT)^6	371	Tetranucleotide
HN7TS9H02D37JE	CCAGTTCTTTATTCTTTGTGGCAAG	59.844	40	3	AGTCCCTGTCAGCAACCTG	60.005	57.895	379	53	(CTTT)^10	93	Tetranucleotide
HN7TS9H02D4A79	CACTTTATGTTTACGCTTCCAAC	57.446	39.13	0	CCCTCGGAGTCCTAAGTGC	59.933	63.158	320	214	(CATT)^6	238	Tetranucleotide
HN7TS9H02D4ASF	CAAGCGTAGAAACGCCACC	60.231	57.895	279	CGGGTTGTGTGCAATAGGC	60.232	57.895	654	486	(AGGG)^9	522	Tetranucleotide
HN7TS9H02D4VMA	TGTCCAGAGAGTTTACAGCATTC	59.197	43.478	76	GACTTGCAAAGGTGGGCTG	60.083	57.895	320	117	(ATCC)^11	161	Tetranucleotide
HN7TS9H02D5035	GTGTGGAAGAGTGCTCCCG	61.118	63.158	227	CCACCCAGTACCTGACTCC	59.473	63.158	470	407	(GGAT)^6	431	Tetranucleotide
HN7TS9H02D5GGW	TGTGCAGTTTGCAGCATGG	60.38	52.632	225	GCCACCTGGAATCCCAATC	58.945	57.895	611	553	(CATT)^6	577	Tetranucleotide
HN7TS9H02D5WW9	AGTAACTGCAGCCTCATATGTC	58.699	45.455	79	TCTCTTCAGCATAAGCGTGG	58.448	50	373	153	(ACAT)^8	185	Tetranucleotide
HN7TS9H02D6WCG	GTGCAAATCATGAAGTGAGGC	58.873	47.619	24	TGCACCCTTGTCCCTTGAG	60.31	57.895	264	63	(AGAT)^8	95	Tetranucleotide
HN7TS9H02D76CZ	ACAGATGGCTTTGGTTATTAGGC	59.821	43.478	71	TTCGGTGGGAAGGTGACAG	60.006	57.895	301	107	(AATG)^6	131	Tetranucleotide
HN7TS9H02D8NZS	TAAGCGCAAGACAGAGCCC	60.827	57.895	236	GACTAGATGGCCCGGAGAC	59.708	63.158	537	270	(GTTT)^6	294	Tetranucleotide
HN7TS9H02D91XR	TTCCAGTGAGGTGCCACAG	60.309	57.895	115	GAAGCCCTCCTCCAGGAAC	60.157	63.158	494	146	(ATTT)^9	182	Tetranucleotide
HN7TS9H02D93UJ	GGAGAACTTTACAAATACCCTGGAC	60.129	44	19	AAATGCTGTCCAAGCTGCC	59.782	52.632	267	66	(AGAT)^9	102	Tetranucleotide
HN7TS9H02D99RR	TCACTGTTGCGCTTTCAGAC	59.803	50	158	ATGGACTTCCACTGCTCCG	60.157	57.895	418	225	(AACC)^6	249	Tetranucleotide
HN7TS9H02D9NSM	CAAATTAGCCACCCTGGGAC	59.287	55	176	ACCAGAAGCACCTTGGTTG	58.641	52.632	489	242	(AATG)^11	286	Tetranucleotide
HN7TS9H02D9YVD	TCGAGGCGTCTCATCTTGG	59.935	57.895	24	GGCTCCTTGCTCTGCAAAC	60.158	57.895	310	164	(ATTT)^6	188	Tetranucleotide
HN7TS9H02DAWYL	GCTTTGGAATGGAGGAGCC	59.255	57.895	248	TGAAGCAAGGCCACATAGG	58.182	52.632	587	371	(CATT)^6	395	Tetranucleotide
HN7TS9H02DB2HU	TGGGCATGGTGGGTAGAAC	60.08	57.895	63	GTTGTGACCTCAATGGAAGGG	59.599	52.381	400	98	(AAAC)^7	126	Tetranucleotide
HN7TS9H02DB6FN	CATTTGCACCATGTCACTGC	59.033	50	178	ATATCTGGGCTCAGCTGCC	60.005	57.895	454	258	(ATCC)^10	298	Tetranucleotide
HN7TS9H02DCSWR	TCCTGCCTGTACTTCTGGG	59.083	57.895	93	AGCTGGACATTGCAGTGGG	61.065	57.895	448	238	(ATTT)^7	266	Tetranucleotide
HN7TS9H02DDE8R	CAAATTAGCCACCCTGGGAC	59.287	55	176	ACCCTGAGCAAAGCAGTTG	59.028	52.632	543	244	(AATG)^11	288	Tetranucleotide
HN7TS9H02DDFN8	AATGTTGTTAGCCGCCCTG	59.183	52.632	493	GCAATCCAGAGATGGGCTG	59.033	57.895	710	551	(AAAT)^6	575	Tetranucleotide
HN7TS9H02DDGKL	TCTTTGCATCAGTCCAGGG	57.795	52.632	41	TGCACTTCAAAGGGACAGC	59.031	52.632	474	321	(GGAT)^6	345	Tetranucleotide
HN7TS9H02DDM5P	TGACAGCTATGCCTACAGGG	59.644	55	232	AGGCTTACCAGGAACAGGG	59.385	57.895	656	336	(AGAT)^9	372	Tetranucleotide
HN7TS9H02DDNL6	AAGCTAAGCAAGGTCCGGC	61.131	57.895	53	CCCTGTTGCTCCACTACCC	60.46	63.158	394	106	(CATT)^7	134	Tetranucleotide
HN7TS9H02DDW8V	ATTATGGACCGAGTGCCTCC	60.007	55	4	GGGAAGCCTAGTGCAGTACC	60.581	60	206	137	(AAAT)^7	165	Tetranucleotide
HN7TS9H02DDZW6	CCGCTTCCTACAATGTTTGC	58.474	50	127	CTTCAGTGTTATGCACTTCTGC	58.67	45.455	330	181	(CATT)^8	213	Tetranucleotide
HN7TS9H02DE0VH	GCCTGATGAGGGCTGGTAG	60.308	63.158	90	ACTTATGCCAGTGTATCTTAGCTC	58.924	41.667	408	329	(AATG)^8	361	Tetranucleotide
HN7TS9H02DEFHZ	CTGGCGCCGTCTTTATTGG	60.012	57.895	113	CCTGGGATTGGCTGCTAGG	60.613	63.158	439	341	(AAAT)^6	365	Tetranucleotide
HN7TS9H02DFTX4	CCTTGCAGCCTTCATGTGC	60.527	57.895	179	TGGCCCTAGTGTTGTTCCC	60.004	57.895	514	371	(ATTT)^6	395	Tetranucleotide
HN7TS9H02DG8XH	ATGGCGAGTTCCGAGATCC	60.008	57.895	234	CACAAGCAGTCTTGATGGAGG	59.672	52.381	536	477	(GCCT)^7	505	Tetranucleotide
HN7TS9H02DGMN6	CTTTAGTGCATTGCCCACG	58.031	52.632	31	GCAGATCCTGTAGCAAATGGG	59.806	52.381	364	274	(AGAT)^10	314	Tetranucleotide
HN7TS9H02DHF45	TCGTGAGCGGAGATGGC	59.843	64.706	1	TCCTTAGAAACATTGAATCAGAGC	57.777	37.5	190	38	(ATCT)^13	90	Tetranucleotide
HN7TS9H02DHUY5	CCTTACTAGAAATGGTGGAGAATTG	58.213	40	68	AACCTTAATTGCACTGAACCC	57.457	42.857	372	103	(ATTT)^7	131	Tetranucleotide
HN7TS9H02DHVTV	AGAAGAGCCTTGAGCAGCC	60.46	57.895	73	GAGGAACAGTTTGTCACGC	57.606	52.632	265	116	(AGGG)^7	144	Tetranucleotide
HN7TS9H02DISMP	AAGGCACCATCCAGATCCC	59.848	57.895	111	GCATCGGGTATTCAGACGC	59.503	57.895	279	193	(GCCT)^6	217	Tetranucleotide
HN7TS9H02DJ2N7	CTGCCCTTCTTTGGGATTGG	59.574	55	116	CCCGTGAAATGGTCGTTCG	59.941	57.895	421	186	(ATTT)^6	210	Tetranucleotide
HN7TS9H02DJ4IU	CAAGCCATTCTGGGTTCTCG	59.658	55	274	ACTAGAAAGTTTGTTCGTGGC	57.511	42.857	537	432	(ATGT)^6	456	Tetranucleotide
HN7TS9H02DJILG	CATGAAGTCGTGCCCAACC	59.863	57.895	71	GCAATGGTTGTCGCTTTCC	58.623	52.632	510	414	(AGGG)^11	458	Tetranucleotide
HN7TS9H02DJR09	GTTGCCTCCACACAGTTCC	59.414	57.895	327	GCATGCCAGGTGGATTAGC	59.711	57.895	632	376	(ACAG)^6	400	Tetranucleotide
HN7TS9H02DJU3I	CACAATGACAGCATGAAGCC	58.467	50	227	TGCCATGGTCAACATTAGCTG	59.668	47.619	522	368	(AATG)^6	392	Tetranucleotide
HN7TS9H02DKOGN	TGATGCAAGCTGCCTTGAG	59.185	52.632	109	GCAAGGTTTATGGGACCACG	59.94	55	296	167	(GAGT)^9	203	Tetranucleotide
HN7TS9H02DKT1M	TGTGAATGGAAGGGCTCAAC	58.852	50	56	ATACTCCACCTGCAGTCCC	59.159	57.895	494	378	(AAAT)^13	430	Tetranucleotide
HN7TS9H02DKZLR	GGCTGCCAGAAGAATGCTC	59.638	57.895	85	GCCCATAAAGCACTCAGCC	59.636	57.895	272	160	(AGAT)^12	208	Tetranucleotide
HN7TS9H02DLP02	TGGGCTTGATGGACTCTGG	59.774	57.895	87	CTGTGCAACTTATGCTTTGGC	59.412	47.619	433	365	(AAAT)^7	393	Tetranucleotide
HN7TS9H02DLV3B	CCCGGTCCCATTATCCACC	60.309	63.158	144	GCCTTGCCCTTCATTCCAC	59.858	57.895	518	369	(ACAT)^6	393	Tetranucleotide
HN7TS9H02DM3EV	AGCCCACTGTGTCTCCAAG	60.005	57.895	106	AATTCACCCAAGCATGCCC	59.472	52.632	384	175	(AAGG)^15	235	Tetranucleotide
HN7TS9H02DN2NC	CAACCAGTTCCTGGGTCGG	61.055	63.158	38	CTGGCGTTGCTCTTCATGG	59.938	57.895	288	71	(CTTT)^11	115	Tetranucleotide
HN7TS9H02DNZCV	AACCAACTGGAGCTGAGGG	60.004	57.895	186	AGCAGTCCAGAGTCCAACC	59.701	57.895	397	300	(AAAT)^6	324	Tetranucleotide
HN7TS9H02DOBWJ	TCCTTCTCCGCCAGGAAAC	60.082	57.895	47	AGACCTTCCGTGCTCTGAC	59.783	57.895	377	261	(ACAT)^6	285	Tetranucleotide
HN7TS9H02DRI6H	AGGTTCGTATCCTGCCGAC	59.934	57.895	490	GCACAGCTAGATCATTCCTCG	59.343	52.381	757	583	(AAAT)^6	607	Tetranucleotide
HN7TS9H02DRRNH	GCTGTGTGTTGGCAAGGAG	60.084	57.895	288	CCTTTGGGCTATTGGGCAG	59.249	57.895	482	427	(ATGT)^6	451	Tetranucleotide
HN7TS9H02DSRGU	GGCAGCCGTCTCTTAGTTG	58.98	57.895	36	GTCATTCAGCCCTTGCTCC	59.261	57.895	197	98	(GGTT)^6	122	Tetranucleotide
HN7TS9H02DSXYA	TGAACTGCACCCGAGTTCC	60.681	57.895	139	CCGCACTTCCAGTTTCTCC	59.196	57.895	587	233	(ATTT)^8	265	Tetranucleotide
HN7TS9H02DTWRA	TCTCTGGATGCAAGTCTCCTG	59.939	52.381	25	GCCTCAGATTCCTCCCTGC	60.61	63.158	447	104	(ACAG)^6	128	Tetranucleotide
HN7TS9H02DU4EP	AGGCCTAGTGCTCCAAACC	60.081	57.895	18	AGGTCCAGCTTGTTCCCTG	60.004	57.895	425	122	(ATTT)^6	146	Tetranucleotide
HN7TS9H02DUHCP	TCGCCTGATGCCACTACTC	59.933	57.895	91	GATAACAGTGCACAGAGGGC	59.374	55	329	151	(ATTT)^7	179	Tetranucleotide
HN7TS9H02DUIZ9	CTGCCCTGAGGTACTGTGG	60.157	63.158	75	ACAGTCCTGATTGTTGTAGGC	58.703	47.619	297	130	(AATG)^8	162	Tetranucleotide
HN7TS9H02DUN1Q	GCTTCTGTGGTTGCAGTCC	59.788	57.895	168	GGATATATGTTGTTAGCCGACCC	59.513	47.826	413	316	(ATTT)^9	352	Tetranucleotide
HN7TS9H02DV42M	AGGGAGCCAGTGATTGTCC	59.774	57.895	44	GTGCTGCTGGAAGGCAAC	60.087	61.111	487	321	(AAAT)^6	345	Tetranucleotide
HN7TS9H02DV8QV	ATGTTCACAGGTGCCTTGG	58.717	52.632	90	TGGGTCGGACACGACTTTG	60.677	57.895	309	159	(CATT)^9	195	Tetranucleotide
HN7TS9H02DVGEU	TTGTAAGCAGTCCCGAGGC	60.457	57.895	225	ACCACTCCTGTAAGCTGGG	59.39	57.895	402	280	(AGGT)^6	304	Tetranucleotide
HN7TS9H02DVTWW	CAGGACACTCAACTGGTGC	59.12	57.895	19	CGAGGCTTCGGCAAATGG	59.934	61.111	370	291	(ATGT)^10	331	Tetranucleotide
HN7TS9H02DVYUW	GTCGCAATGGGTCGGATG	59.318	61.111	328	CAGGAACTTTCCAGCACGG	59.493	57.895	754	368	(ATTT)^6	392	Tetranucleotide
HN7TS9H02DW5EZ	GCTGGCCACCCTAGTAGAC	59.931	63.158	173	TGTAAGCTGCCTTGAGCCC	60.762	57.895	399	321	(CATT)^7	349	Tetranucleotide
HN7TS9H02DWDJ5	GCCCAAGGTGCGAAATGAG	60.232	57.895	210	TGGCCAGCACGATACCC	59.752	64.706	643	563	(GCTT)^7	591	Tetranucleotide
HN7TS9H02DWU4X	CAGGCGCCAGACTAAGACC	60.898	63.158	86	GCCTGAAATGTTCTGCTTGC	59.033	50	384	320	(AAAT)^6	344	Tetranucleotide
HN7TS9H02DWY59	TGGGTTCTTATAATGTGAAAGCTG	58.014	37.5	5	GGACTTTAACTGTATGACTCTGC	57.719	43.478	415	111	(CTTT)^11	155	Tetranucleotide
HN7TS9H02DX61J	CCTGGAGCCGACACTTGG	60.79	66.667	438	GACCTGGATGGAATTGAGCC	59.074	55	704	623	(AATG)^11	667	Tetranucleotide
HN7TS9H02DXV5D	AGAAGAGCCTTGAGCAGCC	60.46	57.895	73	GAGGAACAGTTTGTCACGC	57.606	52.632	265	116	(AGGG)^7	144	Tetranucleotide
HN7TS9H02DZE34	TGCCCACAGAGTTCTAGCG	60.158	57.895	43	GTTTAACCCACTGCGCCAC	60.451	57.895	451	135	(ATGT)^8	167	Tetranucleotide
HN7TS9H02DZGFY	AGCAGCTCACACTCTAGGC	59.857	57.895	145	TGGGTCGAATGACCTCCAG	59.474	57.895	420	265	(ACTT)^6	289	Tetranucleotide
HN7TS9H02EA57D	TGGTTCCTAAACAGGACCGC	60.726	55	473	AAGCTGCCTTGAGCCCTTG	61.368	57.895	650	571	(ATCT)^6	595	Tetranucleotide
HN7TS9H02EAJX0	ATGTTCACAGGTGCCTTGG	58.717	52.632	90	TGGGTCGGACACGACTTTG	60.677	57.895	309	159	(CATT)^9	195	Tetranucleotide
HN7TS9H02EAPTN	TCAGCCCACATGAACTTGC	59.106	52.632	133	ATTGTGAGCCACCCAGAGG	60.08	57.895	508	431	(ATTT)^6	455	Tetranucleotide
HN7TS9H02EAUI5	TGGGCGGCTTTCTCATAGG	60.233	57.895	167	CCAAGGGCACTTTGGCATAC	60.223	55	560	468	(ATCC)^8	500	Tetranucleotide
HN7TS9H02EAW47	GGTGGGAATAATTAAGCAGGGAC	59.884	47.826	270	GTGTAGGCAGTGGCATTAGG	59.084	55	663	508	(ATTT)^8	540	Tetranucleotide
HN7TS9H02EB10L	ACCCAGAGAGGTTTGCCTG	60.004	57.895	60	ACAATTCCTCAGCCCTGCC	60.767	57.895	401	275	(AATG)^7	303	Tetranucleotide
HN7TS9H02EB7R0	TGCGGGCAATAATGGTGAAC	59.939	50	1	AGGCTATTGTTGCGATGGG	58.652	52.632	179	101	(ATCT)^11	145	Tetranucleotide
HN7TS9H02EBW4Z	TCGGTGTCTAGTCATGCCG	59.936	57.895	29	CCTAAGAGGCCTTCACTTTGC	59.67	52.381	475	383	(ATCT)^10	423	Tetranucleotide
HN7TS9H02EBZG9	CTGGCGCCGTCATTATTGG	60.085	57.895	168	TCAACCCTCCGTCTTGTGC	60.681	57.895	469	392	(AAAC)^6	416	Tetranucleotide
HN7TS9H02EC6NT	CCATTTCATTCCCTGACCACAAG	60.576	47.826	9	AATGGGCCAAGTGACCTCC	60.387	57.895	347	189	(ATTT)^6	213	Tetranucleotide
HN7TS9H02ED8E3	ACAGCAGCTTTCTCCAATGC	59.867	50	364	GCCCAACAAGAAAGAGCCC	59.783	57.895	599	467	(AATC)^6	491	Tetranucleotide
HN7TS9H02EDWSL	TTACTTCCAAAGGCACACTTG	57.407	42.857	44	TGTAAGACGTTTAGCCTGCG	59.033	50	213	103	(CATT)^6	127	Tetranucleotide
HN7TS9H02EE84K	GGACTGAGTGACCTCCAGC	60.158	63.158	401	GAAAGACAATGGGAACACTGC	58.46	47.619	601	529	(AATC)^8	561	Tetranucleotide
HN7TS9H02EFIUM	TTGTAGGGACTGGTGGAGC	59.393	57.895	252	TGAGAGCCTAACCCGAACG	59.859	57.895	539	462	(AATT)^6	486	Tetranucleotide
HN7TS9H02EFS7I	AGAGGCTACCAGCAAGTGG	59.777	57.895	183	CAGAAAGCACTCCATGGGC	59.561	57.895	539	220	(AGGC)^6	244	Tetranucleotide
HN7TS9H02EFW0U	GCTCACAGGAGTGCCCATC	61.202	63.158	48	CAGCCCAAAGGAATGTTCTCC	59.941	52.381	497	418	(ATTT)^6	442	Tetranucleotide
HN7TS9H02EIS14	GGCAGACTGATAATGGTGGC	59.44	55	187	ACAGACTCTCAGCCGAACC	59.783	57.895	453	269	(CATT)^11	313	Tetranucleotide
HN7TS9H02EJ4U0	TATGCTCCAGTGGGAAAGG	57.16	52.632	35	GGCGCTTGCTCAATACTGG	60.012	57.895	484	100	(ATCT)^7	128	Tetranucleotide
HN7TS9H02EJLPL	GCTGCCATTGAGGTCCAAG	59.561	57.895	133	GGGTCGGACACAACTTTGC	60.085	57.895	356	251	(AAAT)^12	299	Tetranucleotide
HN7TS9H02EJN49	GTATTACGGGATGCTGTGCC	59.518	55	220	AACTGCCTGGCTGGTCAAC	61.289	57.895	380	320	(AATG)^8	352	Tetranucleotide
HN7TS9H02EK4ZE	AGAAAGGTACACACGCTGTTG	59.54	47.619	21	TTATTATCTTGCTGTAAGCCACC	57.425	39.13	344	255	(CATT)^7	283	Tetranucleotide
HN7TS9H02EKFMQ	ATGGGTCAGATGCGACTGC	60.904	57.895	1	TGAGCCAGGACCAATGAGG	59.774	57.895	267	97	(ATCT)^13	149	Tetranucleotide
HN7TS9H02EKH9D	CCAGGTATTGCAGGTCCAAG	59.003	55	1	GAGCTGTCCTGAGGCTATG	57.761	57.895	177	106	(CATT)^6	130	Tetranucleotide
HN7TS9H02EKJOR	TGGTTCTCTAGTGCAGGGC	59.778	57.895	245	TCTTTGCAGATCTATCATGTTTCC	57.837	37.5	566	477	(AACT)^9	513	Tetranucleotide
HN7TS9H02EL7R6	ATGCTCCAGTGGGAAAGG	57.25	55.556	36	GGCGCTTGCTCAATACTGG	60.012	57.895	485	100	(ATCT)^7	128	Tetranucleotide
HN7TS9H02ELC45	GCAAAGGCAAGGAAGTGGG	60.083	57.895	107	TGGTTGCCAGCCCTTACTC	60.385	57.895	483	167	(AAAT)^14	223	Tetranucleotide
HN7TS9H02ELISR	CGAGGCTATTGCTGCGAGG	61.687	63.158	203	GCCCTGCTGGGATGATAGG	60.385	63.158	544	243	(AGAT)^6	267	Tetranucleotide
HN7TS9H02ELMX3	TCAACTGCTTGCACACTGG	59.338	52.632	197	TCACCACCCAGCAAAGGTC	60.613	57.895	438	238	(ATTT)^6	262	Tetranucleotide
HN7TS9H02ELPXX	GCTTTCGAACGAGCCTGTC	59.942	57.895	32	TGACTTTGCGGCTTGCATC	60.158	52.632	317	175	(AGGG)^13	227	Tetranucleotide
HN7TS9H02ELQKJ	AGAGGTGTGCAGCAAGGTG	60.984	57.895	185	TATGGGACGACAGGGAAGG	58.855	57.895	364	263	(CTGT)^6	287	Tetranucleotide
HN7TS9H02EM3SG	GCATCTCTCCATGGTTGCC	59.336	57.895	96	ATCAGGCACCCTCCCAATC	59.848	57.895	373	250	(GGCT)^6	274	Tetranucleotide
HN7TS9H02EMHA8	TGCTAGGGAAAGCGGACTG	60.157	57.895	168	TTCCCACTCCAGGATCTGC	59.467	57.895	476	409	(CATT)^6	433	Tetranucleotide
HN7TS9H02EMRZZ	CAGGGCAGATCCTTGGGAG	60.233	63.158	205	TCCAGCACATCAGGTTGGG	60.386	57.895	631	278	(CTTT)^13	330	Tetranucleotide
HN7TS9H02EN5YO	GGGTCGCCACAACATAAGG	59.266	57.895	167	GCCCTTGGGCTAATAATGCAG	60.146	52.381	514	442	(CTTT)^10	482	Tetranucleotide
HN7TS9H02EN7S0	CAGGAATGCCAGTTTGCCC	60.158	57.895	268	ATGCTGTCTAGGGACTGGC	59.547	57.895	447	372	(ATTT)^11	416	Tetranucleotide
HN7TS9H02ENE1D	AGGGTCAGTCCTGGTAAACG	59.79	55	10	CAACCGCTTCAGTGACTCC	59.202	57.895	206	113	(AATC)^6	137	Tetranucleotide
HN7TS9H02ENUDV	GAAACTGCTGGAAGCCCAC	59.786	57.895	28	TCAAGTGGCAGGTGGAGAC	60.006	57.895	368	242	(GCTT)^14	298	Tetranucleotide
HN7TS9H02EOFM4	TAGCTGCACTTTGCACCAG	59.114	52.632	103	ATGGACACTGATGGGCAGG	60.157	57.895	508	367	(AGGC)^7	395	Tetranucleotide
HN7TS9H02EOO7A	GCAAGGAGTGACCTCTACCC	60.223	60	15	TGATAGGTGGGCATCTGGC	59.928	57.895	317	236	(GGAT)^6	260	Tetranucleotide
HN7TS9H02EP30P	ACGTACAACGTGCAATGGG	59.496	52.632	50	TTGTGGGCCAGACAGTGG	60.244	61.111	467	204	(AGAT)^11	248	Tetranucleotide
HN7TS9H02EP4RN	GCCCACTGGATGACTTTGC	59.86	57.895	211	AAGACAAGACTGGCCGATG	58.208	52.632	531	361	(AAGG)^11	405	Tetranucleotide
HN7TS9H02EQ9E5	TTGGGTGGATCCGCATCTG	60.535	57.895	254	TGTTGGGTCTGGAAGGCTC	60.004	57.895	595	392	(CTTT)^12	440	Tetranucleotide
HN7TS9H02EQG0T	AATGATGGGCCGAGTGACC	60.536	57.895	124	TTCACAGGAAGGGCAAAGC	59.024	52.632	365	254	(AAAT)^6	278	Tetranucleotide
HN7TS9H02EQTV7	TGGCTTATGCTGAGATGGC	58.345	52.632	365	ACTCAGGTCCTTGGATCACG	59.864	55	527	439	(AAGG)^11	483	Tetranucleotide
HN7TS9H02ER66J	GCAGCCAGTGTGTTTCCAG	60.084	57.895	306	GTTCCACCTGTGTTCTAGGC	58.942	55	479	337	(GATT)^10	377	Tetranucleotide
HN7TS9H02ERF8I	CGAGGCTACTGTTGCGAGG	61.25	63.158	379	CAAAGAGCTATATGAATGCTCCC	57.885	43.478	589	429	(AAGC)^12	477	Tetranucleotide
HN7TS9H02EROBV	TGCTGCAACAAACAATGCC	58.751	47.368	112	GGGATGAAATCAAGGGCAGG	59.357	55	362	182	(AAAC)^6	206	Tetranucleotide
HN7TS9H02ERS6F	ACAGTCCCAGATCATAGGTTCC	59.74	50	108	CACCACATGGGTCACAAGC	59.786	57.895	523	310	(AGGG)^6	334	Tetranucleotide
HN7TS9H02ERT6R	CCATGCCTTCTGTTGCCC	59.454	61.111	102	TGCAGCATTATTAGTTGGGAATG	58.249	39.13	373	193	(AGGG)^7	221	Tetranucleotide
HN7TS9H02ES2EM	ACATGTTGCGCAGTGAAGC	60.451	52.632	255	GCAAGACATCACCAGTCGC	59.94	57.895	596	376	(GCCT)^8	408	Tetranucleotide
HN7TS9H02ESACH	GACAATCGAACAGGCCAGC	59.938	57.895	191	GCCCATTTGAAGGTGTCGG	59.861	57.895	371	278	(AAGG)^6	302	Tetranucleotide
HN7TS9H02ESQL5	GTTTAACCCACTGCGCCAC	60.451	57.895	225	TCCAGCCTGTTCTTCAGGTC	60.079	55	641	290	(AAAT)^11	334	Tetranucleotide
HN7TS9H02ESXYG	AGATATCCATAGTTCAGCTTTCTAGC	59.17	38.462	166	ACTAACACTACAGAATTGCCACC	59.445	43.478	437	353	(GCTT)^6	377	Tetranucleotide
HN7TS9H02EU9E1	TGGGCTTGAGTGAACTCCG	60.383	57.895	4	AGCTGTCCTGAGTACTTGATG	57.878	47.619	412	325	(AATG)^9	361	Tetranucleotide
HN7TS9H02EUP8X	AATACGCCAATTGCGGACG	60.012	52.632	184	ATGGAAGTGGGCAGGAGAC	59.774	57.895	578	465	(ATTT)^8	497	Tetranucleotide
HN7TS9H02EUVSP	GAAGAGCAAGGAGCCTGGG	60.835	63.158	118	CCATGAGACCCAAGGACCAC	60.801	60	331	186	(AATC)^6	210	Tetranucleotide
HN7TS9H02EUZM2	CCACCAAGCAGCCATAACG	59.937	57.895	30	GCTTTCTGGGCAGCTCAAC	60.158	57.895	196	123	(AATG)^6	147	Tetranucleotide
HN7TS9H02EVCRK	GATCGGGTGCCATGCATTC	60.084	57.895	4	GCCCATTCAGTCTTCGCAC	59.938	57.895	439	148	(AATG)^7	176	Tetranucleotide
HN7TS9H02EVHLU	CGAGCACATTCTGCAGTCG	60.015	57.895	501	GCCTTGGACTAGGGCTGAC	60.533	63.158	652	551	(GCCT)^7	579	Tetranucleotide
HN7TS9H02EVIYY	TCTCAGCCTCACAGGGTTG	59.701	57.895	288	ACAGGTCAAATTCACAGAAATCC	58.056	39.13	504	379	(AAAT)^6	403	Tetranucleotide
HN7TS9H02EVWGM	ATTATGGACCGAGTGCCTCC	60.007	55	4	GGGAAGCCTAGTGCAGTACC	60.581	60	206	137	(AAAT)^7	165	Tetranucleotide
HN7TS9H02EW7GJ	TCATCTGACCCACCAGAGC	59.472	57.895	57	AGTAGGAGCACTGAAGTAATCAAC	59.046	41.667	393	291	(CTTT)^8	323	Tetranucleotide
HN7TS9H02EWF9Q	TGGCATAGCCAGTGATGGG	60.233	57.895	229	TGGAAATGTTATACCTTAAGAGTGGTC	59.742	37.037	474	405	(GCCT)^6	429	Tetranucleotide
HN7TS9H02EWT3F	TATCTCCAGCAGTGAACGC	58.001	52.632	297	CGTTGAATTAGATACAGTGACATTC	57.123	36	517	446	(AAAT)^6	470	Tetranucleotide
HN7TS9H02EWWMJ	TTTAAGCTGCCTTGAGCCC	58.795	52.632	27	CCACAAAGAGCAGTGTGGC	60.084	57.895	378	66	(AAAT)^7	94	Tetranucleotide
HN7TS9H02EYFYN	TAGTACCACGGCAGTGAGC	59.859	57.895	180	GCCATGTAGTTAAGTCCTGGTG	59.49	50	568	496	(ATTT)^9	532	Tetranucleotide
HN7TS9H02EYMF4	TTGGCTTTCAGCAAGGTGG	59.327	52.632	2	AGCCATCCTTAGTCTGCCC	59.543	57.895	446	355	(AAAT)^7	383	Tetranucleotide
HN7TS9H03F0VRX	GCACCAGGCTAAGACCTTTC	59.298	55	15	GGACTGCAGGTACTGGGAC	60.157	63.158	418	228	(AAGG)^11	272	Tetranucleotide
HN7TS9H03F0W9S	ATTAGACCTGCCCTTGGCG	60.536	57.895	11	ACCACCTTGAGATTCTGTACTAATG	59.135	40	305	218	(GGAT)^9	254	Tetranucleotide
HN7TS9H03F1VN8	GTGAGGGTTAACAAGTGCCC	59.51	55	75	AGTGCTTTGCATGAACCTTG	57.943	45	268	191	(ACAG)^8	223	Tetranucleotide
HN7TS9H03F2GAC	AGCAAGTGCTGTTGAATCCC	59.507	50	223	GCCTGCCATACTACACTCGG	60.999	60	416	327	(AGGG)^11	371	Tetranucleotide
HN7TS9H03F38N3	GGGTATGCTGGGAATTGTGG	59.359	55	156	ACCTCGCATAAGGGACAGC	60.233	57.895	323	249	(ATTT)^11	293	Tetranucleotide
HN7TS9H03F3AJM	ACACACCACTCTCCTTGGC	60.309	57.895	58	GGGCAAGTATGAAGTGCCTC	59.369	55	420	219	(CTTT)^11	263	Tetranucleotide
HN7TS9H03F3VTO	CCTCTGCCCAAACATGCTC	59.561	57.895	85	GTCTCCTGGGCCATCTAGTC	59.719	60	257	180	(AATG)^8	212	Tetranucleotide
HN7TS9H03F4BYY	TGATGGGCTGAGTGATCTCC	59.642	55	38	TGGCTCTGTGGTATGGCAG	60.157	57.895	479	179	(AAAT)^10	219	Tetranucleotide
HN7TS9H03F4KLS	CCTGAGACAACACAAGGGC	59.113	57.895	31	TCTTGAGGCCACTTGAAAGG	58.486	50	470	320	(AGAT)^8	352	Tetranucleotide
HN7TS9H03F5RJB	AGCTTGCACCTCTTGAACC	58.726	52.632	115	CTCATGCGTTGGGCTGATG	60.011	57.895	498	216	(ATTT)^11	260	Tetranucleotide
HN7TS9H03F6LAY	TGATGCAAGCTGCCTTGAG	59.185	52.632	109	GCAAGGTTTATGGGACCACG	59.94	55	297	167	(GAGT)^9	203	Tetranucleotide
HN7TS9H03F700F	TGAGGCTTACTGGCCTTCC	59.775	57.895	39	GATGGGTGAGTACCCGGAG	59.63	63.158	399	85	(ATTT)^6	109	Tetranucleotide
HN7TS9H03F7EJT	TTTGACCTGGCTCACGACC	60.681	57.895	82	GGGCTTCTTACCATGTTGGC	59.938	55	251	194	(AATG)^6	218	Tetranucleotide
HN7TS9H03F7YD8	CCAAGACTTCCTGGACTTGC	59.225	55	41	TTGCAGCCCAATGATGCAG	59.858	52.632	296	151	(GTTT)^6	175	Tetranucleotide
HN7TS9H03F82MI	TGGGAAGAACTGGATACACC	57.3	50	166	AGTGTGGAGATGTGGACAGG	59.788	55	526	412	(AGAT)^8	444	Tetranucleotide
HN7TS9H03F86EB	TCAGTGGGTGGTTCTTCAC	57.651	52.632	41	CGAGGCTTGTGCGATGG	59.205	64.706	419	353	(ATCT)^8	385	Tetranucleotide
HN7TS9H03F8AO8	GGTGTTTGTAGGTTGTCATAATTC	57.028	37.5	0	AAGGGATGTGCTAGAGGGC	59.543	57.895	250	69	(CTTT)^11	113	Tetranucleotide
HN7TS9H03F8DYJ	CATTCCTCCGGTGTTGAGC	59.27	57.895	10	GCTGCGGGAAAGAAATATTAAGG	58.898	43.478	326	227	(ATCT)^7	255	Tetranucleotide
HN7TS9H03F99W0	TTGTGAGCTGCCCGAGG	60.004	64.706	1	GTGACTTCCTGAATCGTGCC	59.662	55	158	52	(AATG)^11	96	Tetranucleotide
HN7TS9H03FHKPU	ACCAGGTCAGAGAAGGCAC	59.701	57.895	118	TGCTGATTGTTGTGAGCCG	59.493	52.632	387	308	(ATTT)^6	332	Tetranucleotide
HN7TS9H03FHQ8Y	TGTTCTTCCGTATTGGATGGG	58.49	47.619	43	GGAAATTCATCCGGCCACG	60.011	57.895	474	80	(AAAT)^6	104	Tetranucleotide
HN7TS9H03FJLYA	TGGGTTCTTATAATGTGAAAGCTG	58.014	37.5	5	GGACTTTAACTGTATGACTCTGC	57.719	43.478	415	111	(CTTT)^11	155	Tetranucleotide
HN7TS9H03FJT6H	AGGAAGAACGTCCAGAAAGG	57.917	50	70	CCATTGCAACAGAGGCTGG	59.859	57.895	379	106	(AAAT)^6	130	Tetranucleotide
HN7TS9H03FK602	CGAGGGAGTTCGCTGGAAG	60.893	63.158	10	TCGGCTTTCATTGATGTTGGG	59.942	47.619	415	42	(AGCC)^6	66	Tetranucleotide
HN7TS9H03FLMY0	AGCTGACAATCAAAGGTGGC	59.507	50	2	AGGTTGCCTAAGTCCCAGC	60.081	57.895	411	265	(AGGG)^8	297	Tetranucleotide
HN7TS9H03FLTFF	GGAAGGCACTGGATTGTGG	59.18	57.895	132	TGTGTGGCTTGGCAAACTG	59.934	52.632	569	252	(CATT)^7	280	Tetranucleotide
HN7TS9H03FLZXX	GGGTATGCTGGGAATTGTGG	59.359	55	156	ACCTCGCATAAGGGACAGC	60.233	57.895	324	250	(ATTT)^11	294	Tetranucleotide
HN7TS9H03FMTFD	GGAAGACCTCTCAGGACCG	59.557	63.158	205	TTTCCCAGTGACCGATGCC	60.76	57.895	473	234	(GGTT)^6	258	Tetranucleotide
HN7TS9H03FMU37	TCAGCCTACTGCCCACTTC	59.778	57.895	79	ACATCCTGGAGGGCCTTTG	60.08	57.895	314	238	(ATTT)^8	270	Tetranucleotide
HN7TS9H03FN56Z	GACCTGCATGCTGTCCATC	59.341	57.895	91	GGGCCAACTGCTCATTTCC	59.858	57.895	524	160	(CTGT)^6	184	Tetranucleotide
HN7TS9H03FN95M	TGGCACTGAGCCTCTTGG	60.004	61.111	121	TGAGAGCACTGCACCTTCC	60.383	57.895	365	284	(AAAT)^8	316	Tetranucleotide
HN7TS9H03FNK2Y	CCTCATCTTCAGGATCTGGC	58.21	55	85	CCCTGTTAACCATTCTCCTGC	59.393	52.381	376	225	(GGAT)^10	265	Tetranucleotide
HN7TS9H03FP2X0	GCTCAGCCATGAACCCAAC	59.86	57.895	51	GGAACTCTGGGAAGAGCCG	60.531	63.158	466	209	(AAAT)^7	237	Tetranucleotide
HN7TS9H03FS5TP	GGGTCATTGCTGGGTTGTC	59.483	57.895	77	GTGGGAGATGCAGGACTGG	60.534	63.158	404	311	(ATCT)^11	355	Tetranucleotide
HN7TS9H03FS5XM	TCCCAGTTCAGGCTTCCAG	59.698	57.895	165	TAGCGTGCGAGTTGTTTCC	59.208	52.632	451	373	(AATG)^12	421	Tetranucleotide
HN7TS9H03FU92F	ATGGGTCAGATGCGACTGC	60.904	57.895	1	TGAGCCAGGACCAATGAGG	59.774	57.895	267	97	(ATCT)^13	149	Tetranucleotide
HN7TS9H03FULB0	TCGCCTGATGCCACTACTC	59.933	57.895	91	CACGTGTGCCAAAGTGAGC	60.738	57.895	415	151	(ATTT)^7	179	Tetranucleotide
HN7TS9H03FXL7C	TGCCTCTTTCCTGGAGCTG	60.081	57.895	54	CGGGTGAGGAGACATTCCC	60.233	63.158	309	190	(AAGG)^11	234	Tetranucleotide
HN7TS9H03FY0DJ	AGAGTCTATTTCATTTCGCCTG	57.009	40.909	44	CATGGCTGCACACAGAAGG	59.862	57.895	234	76	(GCTT)^10	116	Tetranucleotide
HN7TS9H03FY4GT	TCAGCCCACATGAACTTGC	59.106	52.632	133	ATTGTGAGCCACCCAGAGG	60.08	57.895	507	431	(ATTT)^6	455	Tetranucleotide
HN7TS9H03FYC7P	AGCTTGCACCTCTTGAACC	58.726	52.632	115	CTCATGCGTTGGGCTGATG	60.011	57.895	498	216	(ATTT)^11	260	Tetranucleotide
HN7TS9H03FYNAG	TATCTTGGCTGCCTCGGTC	59.932	57.895	108	AACATGCAGCAGATCAAGTG	57.45	45	456	345	(AAAT)^10	385	Tetranucleotide
HN7TS9H03FZ4NH	AGGGTCAGTCCTGGTAAACG	59.79	55	10	CAACCGCTTCAGTGACTCC	59.202	57.895	206	113	(AATC)^6	137	Tetranucleotide
HN7TS9H03FZG29	AGTGGGAAATGGCCAGAGG	60.08	57.895	45	TTGGCAATGGCGTCACAAG	60.084	52.632	484	407	(GATT)^7	435	Tetranucleotide
HN7TS9H03G0KOM	TGAGGCTGTGTAGCAAGGG	60.081	57.895	477	ACCTGTCCATCTTCGGGTG	59.778	57.895	681	516	(AAAT)^9	552	Tetranucleotide
HN7TS9H03G1629	TGGGTCGGACACGACTTTG	60.677	57.895	145	TCTGTGGTGGTGCCCAATC	60.689	57.895	485	192	(ATTT)^6	216	Tetranucleotide
HN7TS9H03G19RF	GCTGTATAATGCCAGGTCAGTC	59.623	50	13	GGCAACCATCTGCTCAACC	59.86	57.895	298	61	(ACTG)^6	85	Tetranucleotide
HN7TS9H03G1BRU	CCTGGTGCCGTCTTTATTGG	59.655	55	33	CCCTCAGGTCACTCCTTACC	59.571	60	347	268	(AATG)^7	296	Tetranucleotide
HN7TS9H03G1ZD6	GAGCACGCAATAGCCTTGG	60.012	57.895	385	GAAAGCAGAAGTGGTGGGC	59.786	57.895	618	514	(AATG)^6	538	Tetranucleotide
HN7TS9H03G2DFF	AGGCCTGGTTGAAGTCTGG	60.004	57.895	112	GGTATGGCTGTACTGTTAGGTC	58.705	50	301	166	(AGAT)^13	218	Tetranucleotide
HN7TS9H03G43Y9	AGCATGAACCCACCCTCTG	60.08	57.895	79	ACATCTGTCTGATACATACCTTCTG	58.729	40	353	252	(GGAT)^6	276	Tetranucleotide
HN7TS9H03G48YE	AAGGCACCTCTGAGAACCG	60.082	57.895	198	CTGATCCAGCCAACAGAAGG	59.007	55	349	268	(CCTT)^6	292	Tetranucleotide
HN7TS9H03G4PE7	AGTATTGCCAGAACTGAACGTC	59.43	45.455	54	TCGGTGTCTAGTCATGCCG	59.936	57.895	371	101	(AATG)^11	145	Tetranucleotide
HN7TS9H03G5BQC	TCTGGGAAATGATGCAGGC	58.562	52.632	151	AGCAGGGAGAGGACACTTC	59.087	57.895	563	482	(AATG)^7	510	Tetranucleotide
HN7TS9H03G668R	ACAAGTGCCCAGAACCCAG	60.614	57.895	1	CTGGCGCCGTCATTATTGG	60.085	57.895	350	95	(ATTT)^6	119	Tetranucleotide
HN7TS9H03G683D	CCCTTGGGCTGAAGCTAAAC	59.579	55	142	TCTCTATGAAGATGTCGGCCAG	60.142	50	513	407	(AATC)^7	435	Tetranucleotide
HN7TS9H03G6HPX	TGTGAGCCATCCCAAGGTG	60.386	57.895	344	TCACTGGTCACTCCCTACAG	58.842	55	558	396	(AAAT)^8	428	Tetranucleotide
HN7TS9H03G7839	TAGACCGAAGCGCAACCTC	60.527	57.895	60	TGCCTAAGTCTAGCAGCCC	59.549	57.895	328	133	(CTTT)^9	169	Tetranucleotide
HN7TS9H03G7I9S	CTGTGAATCCCACACATGAGC	60.012	52.381	1	TGCTCCTTGGAAGACCCAG	59.698	57.895	415	35	(ATGT)^6	59	Tetranucleotide
HN7TS9H03G8IF2	TTCCACAGGGTAAGCAGGC	60.385	57.895	101	GAGGCTCCTGTGCGATGG	60.942	66.667	316	257	(ATTT)^6	281	Tetranucleotide
HN7TS9H03G9Q4I	CCAGTTCTTTATTCTTTGTGGCAAG	59.844	40	4	AGTCCCTGTCAGCAACCTG	60.005	57.895	380	54	(CTTT)^10	94	Tetranucleotide
HN7TS9H03GAI2B	CGAGGGAGTTCGCTGGAAG	60.893	63.158	10	TCGGCTTTCATTGATGTTGGG	59.942	47.619	415	42	(AGCC)^6	66	Tetranucleotide
HN7TS9H03GAK2X	ACACTCTGTCCTGCATGGG	60.081	57.895	41	GCCAACAAATTTCGGCACC	59.206	52.632	367	157	(ATTT)^7	185	Tetranucleotide
HN7TS9H03GAM8V	TAAGAAGGGAGCCGCAAGG	60.157	57.895	156	CCCAACCTACCTCACAGGG	59.775	63.158	473	342	(ATCC)^7	370	Tetranucleotide
HN7TS9H03GBBJU	TGATGGGCTGAGTGATCTCC	59.642	55	38	AGGCAGAGGCTGTCCTTAAC	60.151	55	315	178	(AAAT)^10	218	Tetranucleotide
HN7TS9H03GBV2U	AGTGCTGGCTGCATTTGAG	59.485	52.632	0	CAGCTTGCTTACCTGCCAC	59.862	57.895	281	132	(GCTT)^12	180	Tetranucleotide
HN7TS9H03GC0FF	TGTTCTTCCGTATTGGATGGG	58.49	47.619	43	GGAAATTCATCCGGCCACG	60.011	57.895	474	80	(AAAT)^6	104	Tetranucleotide
HN7TS9H03GCGJJ	ACACCCACCAGTCCTCAAG	59.621	57.895	5	TCCACAGCCTCGTTATGGC	60.532	57.895	316	190	(AAAT)^7	218	Tetranucleotide
HN7TS9H03GG6E6	GGCTCAGGGTTTGATTCTGG	59.29	55	9	GTGGCTAGCTGCCCTACTC	60.307	63.158	270	69	(CTGT)^6	93	Tetranucleotide
HN7TS9H03GGE6F	TGCCTTACACTGCACGTTG	59.421	52.632	102	CAGCACATTCAGTTGGACCC	59.868	55	396	252	(AGGC)^6	276	Tetranucleotide
HN7TS9H03GIO0A	GGGCCGGAGTACTTAAGGG	59.93	63.158	168	CACACTTGCGGTGACTAAGG	59.592	55	515	263	(AGGG)^6	287	Tetranucleotide
HN7TS9H03GK7SG	ACACTCAGAAACTAAACCTGTGC	59.888	43.478	92	GTGGTTTGCCTTTCCTCCAG	59.794	55	313	160	(GGCT)^6	184	Tetranucleotide
HN7TS9H03GME3Q	TGTCATCAGCAAACCTGGC	59.106	52.632	299	GTGGAGTGCCACACAGAATG	59.87	55	486	412	(AAAT)^9	448	Tetranucleotide
HN7TS9H03GMEN1	CAGCTCAATGCAGAGTGCC	59.937	57.895	42	TCTGGGTCCAAGGTTGCTC	60.004	57.895	462	321	(AGGG)^6	345	Tetranucleotide
HN7TS9H03GN1IS	GAAGACAGTGGCCTTTCCAG	59.225	55	80	CCCTGGTCAAATATTGATGGCG	60.467	50	388	287	(ATTT)^6	311	Tetranucleotide
HN7TS9H03GP2S5	ACCAGGTCAGAGAAGGCAC	59.701	57.895	118	TGCTGATTGTTGTGAGCCG	59.493	52.632	386	307	(ATTT)^6	331	Tetranucleotide
HN7TS9H03GP9OE	TGGCCAAAGCCCTTCCTC	60.325	61.111	72	CCTGTGGAATACGCTTCCC	58.665	57.895	483	217	(CTTT)^13	269	Tetranucleotide
HN7TS9H03GPCZM	ACCGGTTTGATCGCTTTGC	60.158	52.632	205	TGCCCAATGACCAAGGCTC	61.069	57.895	642	469	(AGAT)^10	509	Tetranucleotide
HN7TS9H03GPDY9	GGACCAATCAGGAATACGGC	59.157	55	106	TGGGACTGAGGTTGTGACG	60.007	57.895	417	235	(ATTT)^7	263	Tetranucleotide
HN7TS9H03GPKSD	CACTTTGCGACCTTGACCC	59.79	57.895	153	TGCCTTTGAGGAGCTGTGG	60.687	57.895	454	184	(CTGT)^6	208	Tetranucleotide
HN7TS9H03GPU5U	CAGCCGAGCATCGGATTAC	59.209	57.895	239	CACATGCAGCACTCAGGTC	59.569	57.895	505	384	(GGAT)^9	420	Tetranucleotide
HN7TS9H03GQ38A	CCCACTTCCCTCCCATCAG	59.85	63.158	156	TGTTGTGAGCCATCCCGAG	60.458	57.895	419	343	(ATTT)^6	367	Tetranucleotide
HN7TS9H03GQH28	CATGGGAACACTCGATTGGC	60.011	55	11	CCCACATCTCTCAGCATTCC	58.791	55	401	108	(AAGG)^13	160	Tetranucleotide
HN7TS9H03GRUCG	TTACTTCCAAAGGCACACTTG	57.407	42.857	43	GCTCAGCCTCTTTACCAGC	58.969	57.895	409	102	(CATT)^7	130	Tetranucleotide
HN7TS9H03GSKAZ	TCACTGTTGCGCTTTCAGAC	59.803	50	158	ATGGACTTCCACTGCTCCG	60.157	57.895	417	225	(AACC)^6	249	Tetranucleotide
HN7TS9H03GTHQM	AGGCAGAGAAGGCATAGGTC	59.642	55	19	ACATCTCAAGTCTGGCTGGG	60.151	55	356	194	(AAGG)^15	254	Tetranucleotide
HN7TS9H03GU6T1	CACCCAACCAGCACGATTG	60.158	57.895	46	CTGGCGCCGTCATTATTGG	60.085	57.895	399	137	(ATTT)^8	169	Tetranucleotide
HN7TS9H03GUZDZ	TGGCATTGGTTGTCAGAGC	59.106	52.632	94	TGGAAACCTGGTCGTCTCC	59.703	57.895	270	124	(AGGG)^6	148	Tetranucleotide
HN7TS9H03GWFL9	GCCGAGTGACCTCTGGTTC	60.824	63.158	55	GCCTGAAGAACTATGGACGG	58.806	55	303	201	(AGAT)^13	253	Tetranucleotide
HN7TS9H03GXA5Z	TTGGTTGCCTGAAGAACTTG	57.21	45	70	GAGGCAGACACCTCAAGGG	60.459	63.158	228	127	(CTGT)^6	151	Tetranucleotide
HN7TS9H03GXAHP	AGTGGATCAATGCGCAACC	59.562	52.632	268	TGAGTAGGTGCCCAGATGC	59.854	57.895	520	409	(ATGT)^10	449	Tetranucleotide
HN7TS9H03GXM37	GATGTCAGCTGCCTTGAGC	59.642	57.895	60	TCCTTTGGACCCTTCGGTG	60.005	57.895	386	212	(AAAT)^12	260	Tetranucleotide
HN7TS9H03GXUNS	TGGAATCTGTCTAGCTATGGAGTG	60.194	45.833	81	GCTGAGTCCTTTGGCTTCC	59.187	57.895	393	119	(AAAT)^7	147	Tetranucleotide
HN7TS9H03GZ04S	CTGCCCTGAGGTACTGTGG	60.157	63.158	75	ACAGTCCTGATTGTTGTAGGC	58.703	47.619	297	130	(AATG)^8	162	Tetranucleotide
HN7TS9H03GZYJE	CTCAGACACACTATTCCGTGC	59.48	52.381	62	ACCACTGGGCTGAATGAGG	60.08	57.895	399	165	(AGGG)^12	213	Tetranucleotide
HN7TS9H03HA8DH	ACCACTGGGACAGGACAAC	59.928	57.895	8	TGGTGGAGAATACGACCTGC	60.223	55	218	70	(ATTT)^7	98	Tetranucleotide
HN7TS9H03HB9XX	CCATGGATACTAGCTTGGCAC	59.26	52.381	25	CCAATCAGGGTGATGGCAC	59.255	57.895	226	78	(ATCC)^8	110	Tetranucleotide
HN7TS9H03HC8TP	CACTCCCTGGAGAGGTCTG	59.17	63.158	285	GGGTTGACCTGGCTGGAG	60.403	66.667	633	543	(AAAC)^6	567	Tetranucleotide
HN7TS9H03HCJ9Z	AAGGCACCATCCAGATCCC	59.848	57.895	111	GCATCGGGTATTCAGACGC	59.503	57.895	279	193	(GCCT)^6	217	Tetranucleotide
HN7TS9H03HCX72	CCTGCCAACCTTGCAGTTC	60.083	57.895	64	GCTGCCAGAAACAGTAGGC	59.566	57.895	512	333	(CATT)^10	373	Tetranucleotide
HN7TS9H03HEGY5	TGCTGTTCACAGAGTAGCC	57.832	52.632	39	CCTTTCGATCAACCAGCCC	59.264	57.895	463	72	(AGGC)^7	100	Tetranucleotide
HN7TS9H03HF8SU	CAAGCCATTCTGGGTTCTCG	59.658	55	274	TCAGAACTTCATCCTTATAAATGACCC	59.795	37.037	505	432	(ATGT)^6	456	Tetranucleotide
HN7TS9H03HGICR	GTGCATGACCAAGCCTATCC	59.44	55	111	CCCAACCTACCTCACAGGG	59.775	63.158	352	225	(ATTT)^7	253	Tetranucleotide
HN7TS9H03HGYOG	GCAGCCAGTGTGTTTCCAG	60.084	57.895	135	ACGTTCTCGGGTAGCAAGG	60.158	57.895	349	243	(AGAT)^11	287	Tetranucleotide
HN7TS9H03HHYPR	GCTGGCTAGCATTCCGTTC	59.718	57.895	63	CCTCTAGGTGGAGCTGTGC	60.232	63.158	491	363	(GTTT)^6	387	Tetranucleotide
HMEZZP203F0DM4	GGTAACCTGGTCCCACATC	57.881	57.895	73	GGTGTCAGTTACTCTGGTTGG	58.989	52.381	239	153	(AAT)^6	171	Trinucleotide
HMEZZP203F2047	CTTTCGGTCATCAGCAACCC	59.941	55	3	TGCTGGGATGTCACTGGAG	59.777	57.895	192	40	(AGC)^11	73	Trinucleotide
HMEZZP203F96F8	ACATCCGTGGCATTGCTTG	59.86	52.632	214	TCATGCTAAGTGCATAGTGCC	59.193	47.619	404	336	(CCT)^6	354	Trinucleotide
HMEZZP203FJH76	CCCTAGCTAAGCCGTCCTC	59.708	63.158	16	CCTTCCCGATGGTGGTCAG	60.533	63.158	190	121	(ATC)^7	142	Trinucleotide
HMEZZP203FKWM7	GAACCAGGAACCAATGGCG	59.861	57.895	289	CTGAAGCATCACCGAAGGATG	59.811	52.381	472	419	(AGG)^6	437	Trinucleotide
HMEZZP203FNJFN	GAGCCAAGGAAATCCAGCG	59.64	57.895	18	CCTGAGATGCGGCTGAAC	58.926	61.111	321	213	(AGC)^10	243	Trinucleotide
HMEZZP203FOE0H	AGGTAGCAACACTGTGAAGAC	58.645	47.619	127	TCCTTCTCTGGAGGATGTGC	59.57	55	359	205	(AAT)^6	223	Trinucleotide
HMEZZP203FPC6F	GCATTATCAGCCACCTGCG	60.085	57.895	97	GCCCAGTAGGCATCTGAATAG	58.709	52.381	361	178	(AAC)^6	196	Trinucleotide
HMEZZP203FV4O9	TTGGAGACCTGCAAGTGGG	60.31	57.895	102	AGAGAGCTTCAGCTACGGG	59.254	57.895	275	213	(GTT)^7	234	Trinucleotide
HMEZZP203FWTRK	GAAACGCATAGCTCGGCTG	60.086	57.895	54	GCCTGGAGGAGTGTTGTCC	60.758	63.158	366	296	(GTT)^6	314	Trinucleotide
HMEZZP203FZ0M8	AGGAGAAAGGGTAGACCTGC	59.199	55	45	AGGGCTTGGAGGAAGGTTG	60.003	57.895	262	187	(GTT)^6	205	Trinucleotide
HMEZZP203FZANK	TGGCAACTAGACAATTGCAGG	59.599	47.619	86	ACCCATGTTTCTGGTGTTCC	58.771	50	291	117	(AGG)^6	135	Trinucleotide
HMEZZP203G0L1Q	TGCCCGGAACACTATGTCG	60.529	57.895	79	TGAGCAGACCCACTGAAATTG	59.255	47.619	404	202	(GAT)^7	223	Trinucleotide
HMEZZP203G3HVF	GGACTCCGGGTGATGACAG	60.232	63.158	9	GGAATGGGAAGGCCAGAAC	58.869	57.895	300	95	(AAC)^9	122	Trinucleotide
HMEZZP203G455G	CTGTGCAGAGAGCTTTGGC	59.864	57.895	208	AGTGCACCAGCAGTTACCC	60.686	57.895	460	253	(AAT)^6	271	Trinucleotide
HMEZZP203G59M3	TCGTCGCAGGAAGAGATCC	59.637	57.895	5	GTCCTCCTGAAGGGCCAC	60.084	66.667	259	129	(CCG)^6	147	Trinucleotide
HMEZZP203G5WLY	AGTAGCGTATGGCTGGAAG	57.375	52.632	70	ACCTTGTAAGCTGCCTGGG	60.386	57.895	266	178	(GTT)^6	196	Trinucleotide
HMEZZP203G68A3	TGCTGGAAGTTGAAAGCCC	59.024	52.632	84	GGACTCCAGGTGATGACGG	60.232	63.158	238	138	(GTT)^6	156	Trinucleotide
HMEZZP203G6UGK	GCCTGGAGGAGGGTTGTC	60.084	66.667	40	TGTCGTGGAATGGAAGCAG	58.514	52.632	304	96	(AAC)^9	123	Trinucleotide
HMEZZP203G7WM3	AAGGTCACGTGCATGCTTC	59.493	52.632	40	CTCCTGTGAGCCCTTGGAC	60.459	63.158	426	79	(GTT)^6	97	Trinucleotide
HMEZZP203GD1EW	GCAAGTTGTGAAATAAAGGGCTG	59.767	43.478	16	CTAAGGCAGTTGGTGTGGC	59.488	57.895	181	55	(GTT)^6	73	Trinucleotide
HMEZZP203GDI5F	AGAGCCTGATGCTAACGGG	59.931	57.895	137	GTCAGTCAACCACCACAGG	58.739	57.895	423	167	(AAC)^6	185	Trinucleotide
HMEZZP203GDU8C	ACTAGTGTGGCTGCTGGAC	60.082	57.895	41	ACATGCACGTGAAACACCAG	60.082	50	293	184	(GTT)^7	205	Trinucleotide
HMEZZP203GEEIT	CAGTCTGCTGACCAAGTGC	59.495	57.895	17	TCTTGGAAGCTGAGCAGGG	60.081	57.895	230	109	(ATC)^7	130	Trinucleotide
HMEZZP203GFRAJ	GCTTCACAAGCGTCCTCAC	59.867	57.895	101	TTTCACTGCCCTTGCCAGC	61.96	57.895	379	230	(GGT)^6	248	Trinucleotide
HMEZZP203GGLY1	TTGGAGACCTGCAAGTGGG	60.31	57.895	102	AGAGCTTCAGTCTACGGGC	59.557	57.895	272	213	(GTT)^7	234	Trinucleotide
HMEZZP203GIACD	CGGAAGTCAGAGCTTGTGC	59.574	57.895	119	ACTTCAGCTATTGTACACGGAATG	59.895	41.667	449	354	(ATC)^8	378	Trinucleotide
HMEZZP203GII7J	GGCCTGGAGGAAGGTTGTC	60.762	63.158	271	AGCACTGCCACAAGGTGAG	60.984	57.895	420	328	(AAC)^6	346	Trinucleotide
HMEZZP203GJAYK	TCTTTCCCATGAACCCGAG	57.495	52.632	43	GCCTGGAGGAGTGTTGTCC	60.758	63.158	233	162	(GTT)^6	180	Trinucleotide
HMEZZP203GJFJA	GAGGAGGGTTGTCGATGGG	60.233	63.158	47	TTGATCAGGTGAGGGTGCC	60.081	57.895	342	98	(AAC)^6	116	Trinucleotide
HMEZZP203GJKM5	ACATCCGTGGCATTGCTTG	59.86	52.632	214	TCATGCTAAGTGCATAGTGCC	59.193	47.619	404	336	(CCT)^6	354	Trinucleotide
HMEZZP203GJQRE	CCAGTATTTAGGTGCAAGTGCC	60.337	50	19	TGCTTATGGACTCCCTGCC	59.851	57.895	399	72	(GTT)^6	90	Trinucleotide
HMEZZP203GJS1K	AAGGCTTCGCAAACGTGTC	60.085	52.632	145	CACAGAGAGCTTTGGATATGAGC	59.952	47.826	438	382	(ATC)^8	406	Trinucleotide
HMEZZP203GK8KA	AGCCTGGATGTCTCAACCG	60.157	57.895	0	GTGTAAGTTTGGGCACGGG	59.788	57.895	339	71	(CCT)^7	92	Trinucleotide
HMEZZP203GKY0X	GGGATGGCAATTAGAAGGGC	59.43	55	27	GGACTAGCACCCAGGTCAG	59.856	63.158	374	237	(GTT)^7	258	Trinucleotide
HMEZZP203GLMCV	GAAGCGTTTGGAGAGCCAC	59.865	57.895	9	CTTCCCAAGTGCAGGCAAC	60.083	57.895	255	84	(GCT)^11	117	Trinucleotide
HMEZZP203GPKA7	GGCTCCTGAACAAACTAAGCAG	60.271	50	7	GCTCCAACGTGCATTACTCC	60.013	55	356	45	(GGT)^6	63	Trinucleotide
HMEZZP203GS21D	GAGCTCCACTGTAGGACGG	59.935	63.158	63	AGAAGAGCCTGATGCTGGG	59.852	57.895	313	107	(GTT)^6	125	Trinucleotide
HMEZZP203GT3I3	AGAGCTGAGGAAGTGCTGG	59.778	57.895	262	CGTCCCTCGCAGGTGTC	60.496	70.588	415	305	(AGC)^6	323	Trinucleotide
HMEZZP203GW6BN	GGGCAAGACACACCAAGTAG	59.227	55	164	GGGCCGCAATGGTCGAG	61.634	70.588	509	463	(GTT)^6	481	Trinucleotide
HMEZZP203GWQRY	AGGGAAAGACCAAGCCACC	60.311	57.895	64	TGGAATGGGCTTCCACAGG	60.387	57.895	445	192	(GTT)^7	213	Trinucleotide
HMEZZP203GXHF9	AGGGTCTGGAGGAAGGTTG	58.995	57.895	76	GGGAGGGAGGGAGTTCTAC	58.541	63.158	245	136	(AAC)^6	154	Trinucleotide
HMEZZP203HA6E4	AGTGTTGTCCATGGGTCGC	61.055	57.895	5	GCCAGCGGATTCAGCAAAG	60.597	57.895	204	51	(AAC)^6	69	Trinucleotide
HMEZZP203HB6SI	ACATCCGTGGCATTGCTTG	59.86	52.632	214	TCATGCTAAGTGCATAGTGCC	59.193	47.619	404	336	(CCT)^6	354	Trinucleotide
HMEZZP203HCC5D	GACTCTCCCGGAAACCTCC	59.856	63.158	33	GATCCCTCTGACCGGCTTC	60.307	63.158	316	113	(AAC)^6	131	Trinucleotide
HMEZZP203HCG5A	TCAGCCCAGTCACCAATTC	58.107	52.632	165	TCCCAGTGAAAGTCCACGC	60.681	57.895	434	228	(GTT)^7	249	Trinucleotide
HMEZZP203HDIDG	CCAATATGCCTGTGCACCC	59.633	57.895	28	GATGTCCTCTCCCTGACCG	59.632	63.158	343	121	(GAT)^8	145	Trinucleotide
HMEZZP203HFZLP	ACATGTGCAGTCTTTCGCC	59.493	52.632	13	AGCTCTGGCTTGTAGGCTC	59.855	57.895	442	87	(AGG)^6	105	Trinucleotide
HMEZZP203HGRD9	CGAGGGCATTGTGCTAATGG	60.082	55	48	GCTAGGGAAAGTGGAAGGC	58.576	57.895	323	128	(GTT)^6	146	Trinucleotide
HN7TS9H02C0EYR	ACCTTGAACTCAATGGGTATTGC	60.011	43.478	7	GCGTGCGTTGTACACTCTG	60.23	57.895	288	200	(ATT)^14	242	Trinucleotide
HN7TS9H02C15HW	CAACTGGGTACATGCCGAC	59.272	57.895	31	AGGAGTGCTGTCCATGAGG	59.47	57.895	230	165	(GTT)^6	183	Trinucleotide
HN7TS9H02C1VFY	TGGACTAGGGACCTGGGAG	60.078	63.158	119	AAGACGACGTGGTGCAG	57.893	58.824	400	311	(GAT)^9	338	Trinucleotide
HN7TS9H02C32AO	AGAGGCACCTTCTGACTCG	59.481	57.895	12	TCGTGCAGGAGATCAACCC	60.157	57.895	361	70	(GTT)^6	88	Trinucleotide
HN7TS9H02C3VUV	TGTTCCCAGGGTTGGTCTG	59.927	57.895	211	CCCAACCTACCTCACAGGG	59.775	63.158	627	470	(GAT)^6	488	Trinucleotide
HN7TS9H02C4D97	ACTGTAGTCTGCCTGCCAC	60.082	57.895	213	ACTTGTTAAACCACTCAGGCTC	59.289	45.455	443	292	(AAC)^6	310	Trinucleotide
HN7TS9H02C4DMI	CAGCAATGATGGGCAAGGG	59.932	57.895	144	CGGCGTGAACGTTAAGTGG	60.23	57.895	529	403	(GTT)^9	430	Trinucleotide
HN7TS9H02C4SBO	AGCTGATGGCGTAGGACAG	59.933	57.895	89	ACAATTCAGCACATGCCAG	57.236	47.368	276	168	(AAC)^7	189	Trinucleotide
HN7TS9H02C5QOV	GTGGGTGCATGAGCATACC	59.338	57.895	76	GGTCAGACTAGATGGCCCG	60.008	63.158	473	347	(GAT)^11	380	Trinucleotide
HN7TS9H02C5UAD	CCTGGCTTTCCATACCTTCTG	59.116	52.381	107	TACAGGTGTTCCGGCAGTC	60.083	57.895	511	282	(ATT)^7	303	Trinucleotide
HN7TS9H02C5WK4	GCATGTCCAGCACAAGACC	59.862	57.895	123	CTCCCTCTTACCAGTCCGC	59.933	63.158	457	184	(GAT)^6	202	Trinucleotide
HN7TS9H02C65OB	CAAGCTGCAGGTAGGAATGAG	59.468	52.381	0	TTGCTTGCCTTGGCAGTTC	60.008	52.632	362	192	(AAT)^11	225	Trinucleotide
HN7TS9H02C6C7D	CCAAGGCTGAGATTCAAGGG	59	55	100	GGCTTGAGTGGACTTTGGC	59.786	57.895	358	235	(GTT)^8	259	Trinucleotide
HN7TS9H02C787J	AGTAAGGGATGTGACGCTGG	60.223	55	137	AAAGGTCTTGGCCTGGTGC	61.296	57.895	452	269	(AAT)^11	302	Trinucleotide
HN7TS9H02C7AHO	CGTGCTGCTCAGAAAGCC	59.858	61.111	272	CTGCAGGAGTGTTCGCATC	59.647	57.895	527	474	(AGC)^6	492	Trinucleotide
HN7TS9H02C7OSP	GGTCAGACACGACTTTGCG	59.87	57.895	267	AAGCCCTGCCTACTAGCTC	59.241	57.895	467	301	(AAC)^6	319	Trinucleotide
HN7TS9H02C82JO	CACCTTTCAAGCGACCTGC	60.158	57.895	219	GTCGCAATGGGTCAGATGC	60.012	57.895	646	599	(GTT)^6	617	Trinucleotide
HN7TS9H02C87BE	TGCCACCCATCTTCCAGAC	60.081	57.895	206	CCGAACGGAAAGATGCTCAC	60.014	55	396	317	(ACC)^7	338	Trinucleotide
HN7TS9H02C87G2	ACCTGTGTACTTGGCCCTG	60.004	57.895	4	GACCAACCAATGGCGATCC	59.638	57.895	379	105	(GGT)^6	123	Trinucleotide
HN7TS9H02C8A42	ACCTGCAAAGCGGAATTGG	59.783	52.632	382	ACTCATCAACACGAAGAGGC	58.662	50	716	508	(AGG)^10	538	Trinucleotide
HN7TS9H02C8NFE	GGTACAACTGCTGGGCAAC	59.787	57.895	77	GAATGGTGAGTAAGCAGGGC	59.369	55	346	234	(GAT)^8	258	Trinucleotide
HN7TS9H02C8XEK	GAGGCTGTAGGACACAGGG	59.856	63.158	316	TGAGCAGCATGGCTAAGGG	60.536	57.895	624	456	(CCT)^6	474	Trinucleotide
HN7TS9H02C9BJW	CCTATCTTTGACAGCCTTGCTC	59.817	50	397	TGTAGGAGTGCGTCTTGCC	60.455	57.895	550	489	(CCT)^6	507	Trinucleotide
HN7TS9H02C9E3J	AGTGGGAATGGCTTGTTGC	59.402	52.632	143	AGTGGGCGACTCGGAAAG	60.086	61.111	542	384	(CGT)^7	405	Trinucleotide
HN7TS9H02CXA62	TGAGAGAAATGGACTTACCTGC	58.56	45.455	159	TCGGTGTCTAGTCATGCCG	59.936	57.895	602	287	(AGG)^7	308	Trinucleotide
HN7TS9H02CY24O	GGAGCAGAATGGGCTTGTC	59.261	57.895	192	ACCTGGAGGAGTGTTGTCC	59.314	57.895	407	336	(GTT)^6	354	Trinucleotide
HN7TS9H02CYPJO	AGTCGCGATGGGTCAGATG	60.306	57.895	120	GAACAGCTGAAGCTCACAGG	59.589	55	433	153	(AAC)^6	171	Trinucleotide
HN7TS9H02CZ4T8	TATCCACAAGTGCCAGCCC	60.462	57.895	117	TCACTCAATCGGCTATGCG	58.463	52.632	512	368	(GTT)^6	386	Trinucleotide
HN7TS9H02D0S3S	CAACTTGGGTGGGAAACGG	59.71	57.895	107	GTGTAACGTGGTGTCCTGC	59.5	57.895	331	231	(AAC)^6	249	Trinucleotide
HN7TS9H02D263U	CAGCAAACAAGGTGCCCTC	60.083	57.895	65	CACCTGCTAGATCCCAGCC	60.308	63.158	216	99	(AAC)^6	117	Trinucleotide
HN7TS9H02D2HU4	TTTGACGGAGCCCTGGATG	60.46	57.895	183	TGAGGCCAGCAAATCCAAC	59.099	52.632	508	408	(AGG)^9	435	Trinucleotide
HN7TS9H02D2Z7T	TTCTGCTCAACTTTGTGGC	57.096	47.368	128	GTTGAGTTGCATGCCAGGG	60.158	57.895	380	186	(GTT)^6	204	Trinucleotide
HN7TS9H02D32Z6	CAGCCCATTTGTGGAAGCC	60.158	57.895	361	TCTCAGACACCAGCCCTTC	59.396	57.895	704	597	(GGT)^7	618	Trinucleotide
HN7TS9H02D384Q	GGACTCCGGCCCATGAC	60.171	70.588	37	ATACCAGAATCCAAGGAGCC	57.436	50	186	123	(AAC)^6	141	Trinucleotide
HN7TS9H02D3CNM	AGCTCCGTAAGAACCAGCC	60.157	57.895	142	GCCTGGAGGAAGGTTGTCC	60.762	63.158	516	441	(GTT)^7	462	Trinucleotide
HN7TS9H02D3HB9	CCTCCCTCTTGAGACAGGC	59.855	63.158	13	GCCTGGAGGAAGGTTGTCC	60.762	63.158	214	138	(GTT)^7	159	Trinucleotide
HN7TS9H02D3VF4	TGCAAGAACAGCATTCAGAGG	59.602	47.619	230	GCCTGGAGGAGTGTTGTCC	60.758	63.158	412	341	(GTT)^6	359	Trinucleotide
HN7TS9H02D46RP	AGCCAGAAGGTGGATCCTG	59.465	57.895	287	GCAGTCCAAATGGCTGGTAG	59.654	55	548	383	(GAT)^8	407	Trinucleotide
HN7TS9H02D4KG3	GCATGTCCAGCACAAGACC	59.862	57.895	122	TCATGGACTGGAAGAGCGG	59.856	57.895	330	183	(GAT)^6	201	Trinucleotide
HN7TS9H02D5X16	ACGGCCGAGGATAAGATGG	59.705	57.895	219	GATGGCACTGTGAGGAAGC	59.267	57.895	587	369	(AGC)^7	390	Trinucleotide
HN7TS9H02D6OXF	GAGAAAGGACACCAAGCGG	59.196	57.895	33	GGCCACAAGTCTGGGAAAG	59.106	57.895	424	333	(GCT)^6	351	Trinucleotide
HN7TS9H02D6PK1	CAGCTGTGGAATGTGCTCC	59.565	57.895	29	GCCACACAGCCTTCTCCAG	61.424	63.158	357	291	(AAT)^11	324	Trinucleotide
HN7TS9H02D722X	AAGCATGTTGTGCTGGGAC	59.407	52.632	207	CAGAGTGGCTTACATCATTCTCC	59.638	47.826	376	319	(GTT)^6	337	Trinucleotide
HN7TS9H02D7DUZ	TGACTATTGGGCAGGAGATGG	60.006	52.381	173	TGGAGGACGTGTCTCAAGG	59.403	57.895	468	315	(GAT)^6	333	Trinucleotide
HN7TS9H02D7J60	TCCCTGTCCCACAGAATGC	60.081	57.895	97	CCATGTCTAAATTAAGTTCAGCTCC	58.747	40	543	453	(ATC)^14	495	Trinucleotide
HN7TS9H02D802B	ACTGGGTAACCTCCCAAAGG	59.708	55	40	AGGTGTTGGAGAGCACTGG	60.005	57.895	367	110	(AAC)^6	128	Trinucleotide
HN7TS9H02D8XIU	CAACTTGGGTGGGAAACGG	59.71	57.895	107	GTGTAACGTGGTGTCCTGC	59.5	57.895	331	231	(AAC)^6	249	Trinucleotide
HN7TS9H02D92HM	TGCCCAGAAGGCTATCACC	59.851	57.895	218	CTTGGCATCTCCAGGCAAC	59.561	57.895	535	267	(ACT)^6	285	Trinucleotide
HN7TS9H02DA6KT	CAGTTTAACCCACTGCGCC	60.158	57.895	410	ACCCTGCTAACATTACAGCATTC	59.823	43.478	757	675	(AGT)^7	696	Trinucleotide
HN7TS9H02DAESP	GGGACTCCAGGCGATGAC	60.242	66.667	40	AGCAGGACTTGTCCCACAG	60.005	57.895	236	127	(AAC)^6	145	Trinucleotide
HN7TS9H02DAET3	GAGGACCTTTGGGAGAGCC	60.157	63.158	226	AGAGCACCCTCAAGCAAGG	60.385	57.895	580	407	(AGG)^6	425	Trinucleotide
HN7TS9H02DAHWU	AGGCTACTGTTGCGATGGG	60.533	57.895	147	AGTCCTGAGTGGCAGTTGG	60.005	57.895	511	186	(AAT)^7	207	Trinucleotide
HN7TS9H02DB4AF	GTTTGCGCCTGTAGAGACC	59.277	57.895	446	ACCCTCCAACTTCAGGCAG	60.004	57.895	624	518	(AGG)^14	560	Trinucleotide
HN7TS9H02DDL5H	AAACCCAGCAGGTCATCCC	60.387	57.895	24	GCTGACAAACAGGCACTGG	60.084	57.895	250	184	(AGG)^8	208	Trinucleotide
HN7TS9H02DDRSI	ACATTTAGTTGGCTGAATGCCC	60.273	45.455	40	TAGGCCAGTGCTTTGGACG	60.756	57.895	237	97	(AGC)^6	115	Trinucleotide
HN7TS9H02DE0TJ	TTGCCCAGAAATGACCTGC	59.099	52.632	2	TCCAGGAGAACCAACAGGG	59.309	57.895	334	146	(GAT)^6	164	Trinucleotide
HN7TS9H02DE4AJ	TGACTTGAACGGACCGCAG	61.042	57.895	174	GCTTCTCCTTTCCCAAGGC	59.18	57.895	388	312	(AAT)^13	351	Trinucleotide
HN7TS9H02DEBCE	GGATGAGGTGGCTAGTCGG	60.008	63.158	97	TCTGGCAAATCCAGCAAGTG	59.507	50	318	219	(AAC)^6	237	Trinucleotide
HN7TS9H02DEOUB	CACCCAAATCCGGGAATGC	59.933	57.895	95	GCTCGTGGGCCAAATCTTC	59.937	57.895	518	294	(AAC)^7	315	Trinucleotide
HN7TS9H02DER37	TGACATGCAGACACCTAATGC	59.398	47.619	72	AACCCTGACTGCTCCTTGG	60.004	57.895	408	111	(GTT)^8	135	Trinucleotide
HN7TS9H02DFS18	GTGATTGGCAGTAATCAGAAACG	59.097	43.478	130	TCACTATAATGCTTGCAGTGGG	59.222	45.455	341	276	(AAT)^6	294	Trinucleotide
HN7TS9H02DG0KR	TGCATGATGGGCCTACCTC	59.928	57.895	300	AGTGGGTGTTCTCAGCAGG	60.005	57.895	567	520	(GTT)^6	538	Trinucleotide
HN7TS9H02DG2VE	GCTACATCTAGTCAGCCTTTCC	59.036	50	29	ACTGCCACCATGGCTACTG	60.46	57.895	225	88	(GTT)^6	106	Trinucleotide
HN7TS9H02DGG61	CCACACACCTTGTTGAGGG	59.031	57.895	114	GCTGGGCCTTGAATGCTG	59.851	61.111	443	208	(GAT)^6	226	Trinucleotide
HN7TS9H02DGV8S	ACCAGAGTACACACCAAGG	57.03	52.632	67	AGTGTCCTGTTGCACCATC	58.423	52.632	234	110	(ATT)^13	149	Trinucleotide
HN7TS9H02DGXM2	AGCTTAACTCGTTTGTGGAGTTC	59.952	43.478	151	CAGGCTTGCATGTTCGTCC	60.231	57.895	536	334	(ATT)^6	352	Trinucleotide
HN7TS9H02DHI61	AGGGCCTGGAGGAATGTTG	60.08	57.895	237	ACTTCCTGGTTCAGCGGTC	60.383	57.895	451	297	(AAC)^6	315	Trinucleotide
HN7TS9H02DHPTM	TGTCAGCATTCACGACCAG	58.525	52.632	22	AGGGTTAGCAGAGGGTTCC	59.075	57.895	352	242	(GTT)^6	260	Trinucleotide
HN7TS9H02DHUL4	GCAACAAGCATGGCCTGAC	60.82	57.895	4	ACCGATCAAGGTTGTGGAC	58.125	52.632	416	308	(AAC)^6	326	Trinucleotide
HN7TS9H02DHYCE	TCCTTTGGGAACTCCAGAGC	60.078	55	129	CAGCTAGGGCATTTGTCTGC	60.011	55	519	452	(GTT)^6	470	Trinucleotide
HN7TS9H02DHYHJ	AAACCCAGCAGGTCATCCC	60.387	57.895	24	GCTGACAAACAGGCACTGG	60.084	57.895	250	184	(AGG)^8	208	Trinucleotide
HN7TS9H02DI8EE	GCTTGAGGGTTTCTTGAGGC	59.868	55	46	CCTGCCCTTAGCTCCCAC	60.164	66.667	207	109	(CCT)^7	130	Trinucleotide
HN7TS9H02DIE35	GATGTGCCTTTGCCCTGAC	59.86	57.895	203	GCACAAGTTTCAGCATGATTTGG	60.322	43.478	456	338	(AAG)^7	359	Trinucleotide
HN7TS9H02DIE4Z	ACCTGGAGGAGTGTTGACC	59.314	57.895	22	AATTTGTGCTGCCCAGGTG	59.705	52.632	367	78	(AAC)^6	96	Trinucleotide
HN7TS9H02DJ6EN	TCCAGGAGCTCTTTCAGGC	59.777	57.895	10	TGGTACACCTGAGAAACGGG	60.08	55	303	135	(CCT)^7	156	Trinucleotide
HN7TS9H02DJNZZ	AGTCGCGATGGGTCAGATG	60.306	57.895	32	GAACAGCTGAAGCTCACAGG	59.589	55	345	65	(AAC)^6	83	Trinucleotide
HN7TS9H02DK0O7	AGGCTGATGTCAGTGGAGC	60.157	57.895	330	AAATGAAGGACTCTCAATGCTG	57.449	40.909	572	410	(ATC)^9	437	Trinucleotide
HN7TS9H02DK8VL	GCCTGGAGGAGTGTTGTCC	60.758	63.158	109	GGCTCATGATCTACCTGCC	58.128	57.895	364	165	(AAC)^6	183	Trinucleotide
HN7TS9H02DKFCX	GAGGTGACCCATCATGCAG	58.658	57.895	47	GCACGTTTCTGGTGGACAG	59.792	57.895	316	103	(GTT)^6	121	Trinucleotide
HN7TS9H02DKO9Z	ATAAGCGGCTGTCTAGGGC	60.007	57.895	203	GGCAATAACGCCAGGGATG	59.712	57.895	407	279	(GAT)^7	300	Trinucleotide
HN7TS9H02DKWJ9	GGCATCAGGTTGGGAAAGG	59.174	57.895	76	TCACACTGTATATGCCCTACCG	60.142	50	489	385	(ACT)^6	403	Trinucleotide
HN7TS9H02DLDLY	TGTCCATGAGGTCGCGATG	60.602	57.895	132	AGTGACCATCTGGGCAACC	60.386	57.895	306	174	(AAC)^6	192	Trinucleotide
HN7TS9H02DLDZY	CACCAGTGCAAAGCACCTC	60.084	57.895	128	AGCCATGCTCAGGCAAATG	59.555	52.632	364	298	(GCT)^6	316	Trinucleotide
HN7TS9H02DM1KC	GCAGATGCTATTGGGTTGGC	60.365	55	152	TATGGCCACACGGGAGAAC	60.157	57.895	578	283	(AGT)^6	301	Trinucleotide
HN7TS9H02DN2PJ	CGCAATGGGTTGGACACG	60.164	61.111	174	AGACAGGGCTGGGTTCAAG	60.004	57.895	377	205	(AAC)^6	223	Trinucleotide
HN7TS9H02DNBQR	TGAAATCGTTTGCAACTGCTC	58.743	42.857	114	GCTTGGGCTTCGCTACTTG	59.938	57.895	277	209	(AGG)^7	230	Trinucleotide
HN7TS9H02DNNHR	GATGGAGTGGCCGCCTG	60.913	70.588	71	CCAGCGATTAGTGAGACACC	58.815	55	487	141	(AGC)^9	168	Trinucleotide
HN7TS9H02DOG07	ACTGTAGTCTGCCTGCCAC	60.082	57.895	213	ACTTGTTAAACCACTCAGGCTC	59.289	45.455	445	292	(AAC)^6	310	Trinucleotide
HN7TS9H02DOIP7	AGGACGGTTGTCCATGAGG	59.778	57.895	196	ACATGTGTGGCCCTTTAAACC	59.801	47.619	451	246	(AAC)^6	264	Trinucleotide
HN7TS9H02DPB46	TGGAAGGAGCCTGGAAGTC	59.39	57.895	181	GGGAAACGTTCCAGTCAAGC	60.152	55	558	293	(AGG)^11	326	Trinucleotide
HN7TS9H02DPL4E	CGCTGGAACTTGCAAAGGC	61.106	57.895	321	AGCTCTCAAGCTGATGGAAC	58.357	50	584	534	(ATC)^7	555	Trinucleotide
HN7TS9H02DPQ97	GCCTTCAATATCGGCAGAAGG	59.877	52.381	29	GCCTGGAGGAGTGTTGTCC	60.758	63.158	258	187	(GTT)^6	205	Trinucleotide
HN7TS9H02DPRRL	AGAGCTAACAAACAGCTTATGGG	59.507	43.478	42	TGGCAGACAGTCCTCTTGAC	60.08	55	217	77	(AAT)^9	104	Trinucleotide
HN7TS9H02DQC2P	AACTTCAGCGGGCCATTAC	58.882	52.632	218	TGGCTTCTACCATGGGCTC	59.851	57.895	515	310	(GTT)^7	331	Trinucleotide
HN7TS9H02DQG28	TGCCCAGAAGGCTATCACC	59.851	57.895	218	CTTGGCATCTCCAGGCAAC	59.561	57.895	535	267	(ACT)^6	285	Trinucleotide
HN7TS9H02DQJB9	GGCCTGGAGGAAGGTTGTC	60.762	63.158	85	AATGAGTGCAATGGTGCGG	59.86	52.632	369	134	(AAC)^6	152	Trinucleotide
HN7TS9H02DQO60	TCCTGCCGATCTCAAAGGG	59.854	57.895	250	GCCTGGAGGAGTGTTGTCC	60.758	63.158	499	427	(GTT)^6	445	Trinucleotide
HN7TS9H02DQZC5	TGGGCCACAAGTTACCCAG	60.31	57.895	98	CGTGCAACAAGTGCAAACC	59.436	52.632	385	130	(ATC)^6	148	Trinucleotide
HN7TS9H02DS2HF	TGGGAGAGGGTGCATCTTG	59.774	57.895	241	GTCTGCAGTCCAACACGTC	59.503	57.895	412	346	(AAC)^6	364	Trinucleotide
HN7TS9H02DS62M	ACATTGTCCAGCGGCACTC	61.421	57.895	49	CGAGGCTTGTTCGCGATG	60.015	61.111	265	159	(ATT)^12	195	Trinucleotide
HN7TS9H02DTB2O	ACGCATTTGAAACATCGGC	58.33	47.368	57	TCCTGGTGCATGACTGAGC	60.459	57.895	468	92	(ACC)^8	116	Trinucleotide
HN7TS9H02DU10K	CTTGGGTGCTCTTTCCACC	59.106	57.895	295	AGCTGAACTACATAGAGTAACACG	58.881	41.667	599	497	(GAT)^7	518	Trinucleotide
HN7TS9H02DUZ5E	GCGACAGTCTAGCCCGAG	60.318	66.667	74	GACGGTGGGTGAGAGCC	60.089	70.588	277	102	(AGC)^6	120	Trinucleotide
HN7TS9H02DV5US	AGCTTTAATTGCACCCAGC	57.222	47.368	180	TCTGTGACTGAGCGCTATAC	57.606	50	506	294	(AGT)^8	318	Trinucleotide
HN7TS9H02DV99D	TGCCCGTTCACCAAGGAG	60.322	61.111	65	GAGCCATGATGACGGAAGC	59.422	57.895	392	297	(CGG)^7	318	Trinucleotide
HN7TS9H02DVKGI	GTTGCCCAGACAACCTTGG	59.709	57.895	166	GGCAGGAGCTGGGACATAG	60.308	63.158	493	409	(ATT)^12	445	Trinucleotide
HN7TS9H02DVYR2	GAAGGTTAAGTAGCCCTCTGG	58.218	52.381	117	CACCATGTTTGACAATGTTGC	57.607	42.857	566	259	(GTT)^6	277	Trinucleotide
HN7TS9H02DW8T6	GCATGTCCAGCACAAGACC	59.862	57.895	123	TCATGGACTGGAAGAGCGG	59.856	57.895	331	184	(GAT)^6	202	Trinucleotide
HN7TS9H02DXDP0	AGTCACAGGTTCTCAGCCG	60.083	57.895	0	CGAAACGTTCAGGCCCATC	59.939	57.895	315	64	(AGG)^6	82	Trinucleotide
HN7TS9H02DY4IO	GTGTGGTGCCATGGTTAGC	59.861	57.895	228	GGCGCGATGGGTCAGATG	61.701	66.667	631	584	(GTT)^6	602	Trinucleotide
HN7TS9H02DZ8QM	CTGGCATCCCAATCACTGC	59.635	57.895	182	AGCATCCTGTCTTAACATGGC	59.116	47.619	519	442	(AGG)^7	463	Trinucleotide
HN7TS9H02DZPPF	AGCTCCAAAGCAGTCAGGG	60.385	57.895	164	CCCAGTTCATAAATCGGCCAC	60.079	52.381	561	429	(GTT)^7	450	Trinucleotide
HN7TS9H02DZQLV	TGCCTAGGAAGGCCTCTG	58.707	61.111	34	GCCTGGAGGAGTGTTGTCC	60.758	63.158	266	193	(GTT)^6	211	Trinucleotide
HN7TS9H02EAOAH	ACCCATGAACACAAGTGCC	59.024	52.632	295	GCTCAGTTTGCTGCTTCCC	60.158	57.895	581	510	(AGC)^8	534	Trinucleotide
HN7TS9H02EAOWE	TAGGTGAGGTGGCCAGAAG	59.083	57.895	79	CATCGAAATGTCAAATGTAGCTC	57.077	39.13	487	405	(GTT)^6	423	Trinucleotide
HN7TS9H02EB2I0	TCACGATGGGTCGGATGC	60.242	61.111	94	AACTTGCAGCCCTGGTTTC	59.326	52.632	459	125	(AAC)^6	143	Trinucleotide
HN7TS9H02EB4I0	TGGAAGTGTGAGGACCAGC	60.006	57.895	427	AGCCCAGGAAGTCGTACAG	59.478	57.895	666	474	(AGC)^6	492	Trinucleotide
HN7TS9H02EBFNZ	TTGTTCCACCCACTGTTGC	59.254	52.632	220	ACATGTCCAGAGAGCTGCC	60.157	57.895	535	339	(GTT)^6	357	Trinucleotide
HN7TS9H02EBGVL	GCCACCTTGGGTTCATTGC	60.456	57.895	250	TGGAACTGCCCTCTTTGGG	60.31	57.895	520	300	(ACC)^6	318	Trinucleotide
HN7TS9H02EDNG5	CGGTTTGTCCACACTCGTC	59.505	57.895	289	GTGCCGCTTTACGATGCTC	60.375	57.895	441	363	(AGG)^7	384	Trinucleotide
HN7TS9H02EDNN2	TCCGCTGGATGTAAGCAGG	60.233	57.895	117	GCTAAGACGTTAAACTGAAACATGG	59.678	40	480	398	(AAC)^7	419	Trinucleotide
HN7TS9H02EDPAJ	GCCTTTGCCCACCTTTCAG	60.083	57.895	333	TCTGGGCAGGCAAGACG	60.004	64.706	527	475	(CCT)^6	493	Trinucleotide
HN7TS9H02EGBWE	TCCGCTGGATGTAAGCAGG	60.233	57.895	118	GCTAAGACGTTAAACTGAAACATGG	59.678	40	481	399	(AAC)^7	420	Trinucleotide
HN7TS9H02EH0A5	TCAGGTGATCCCTAGCAAGTATG	60.137	47.826	33	ACAAACAAGATTACTGAGAACAGG	57.901	37.5	273	90	(AAT)^18	144	Trinucleotide
HN7TS9H02EHWY1	CTCCATTGTTGCTCTGCCC	59.561	57.895	127	GTCGCAATGGGTCGGATG	59.318	61.111	444	397	(GTT)^6	415	Trinucleotide
HN7TS9H02EIDHF	CACTGGTGCAGAAATGGGC	60.158	57.895	5	TTCCTTGATGGTTGCATTCTG	57.537	42.857	230	100	(GCT)^8	124	Trinucleotide
HN7TS9H02EIDJ8	TGCCCAGAAGGCTATCACC	59.851	57.895	218	CTTGGCATCTCCAGGCAAC	59.561	57.895	535	267	(ACT)^6	285	Trinucleotide
HN7TS9H02EINOQ	GTCTAGCAAACACGCAGGG	59.572	57.895	311	GAGGCTGTTCGCGATAGGG	61.039	63.158	553	474	(GTT)^6	492	Trinucleotide
HN7TS9H02EIQ3O	GTAAAGGGATGTGACGCTGG	59.376	55	138	TGTATAAGGTTGTGCATTGGC	57.616	42.857	342	271	(AAT)^11	304	Trinucleotide
HN7TS9H02EIY13	TTGCCAACCTTCTGGCTTG	59.327	52.632	52	CTTCTGTAGCCTTGGATTAACTTG	58.336	41.667	357	126	(ATC)^9	153	Trinucleotide
HN7TS9H02EJ5LT	TTTGAGTCCCTGTGCAGCC	60.987	57.895	94	AAAGGACGCTTCCCACCTG	60.686	57.895	391	144	(ATT)^11	177	Trinucleotide
HN7TS9H02EJVJ4	AAGCATGTTGTGCTGGGAC	59.407	52.632	207	CAGAGTGGCTTACATCATTCTCC	59.638	47.826	376	319	(GTT)^6	337	Trinucleotide
HN7TS9H02EK9DA	TCCTTTGGGAACTCCAGAGC	60.078	55	129	CAGCTAGGGCATTTGTCTGC	60.011	55	519	452	(GTT)^6	470	Trinucleotide
HN7TS9H02EKHS5	TGTATAATTGGCATGTGGGAAGG	59.564	43.478	273	ACCAAATCTTGCTTTCCAGCC	60.146	47.619	441	383	(GTT)^6	401	Trinucleotide
HN7TS9H02EKQP7	TGTGACATTGTGCAAGAGGC	59.797	50	134	ACTACAAATCAATCCGGAAGC	57.074	42.857	412	320	(ATT)^12	356	Trinucleotide
HN7TS9H02EKVDH	GGCCTGGAGGAAGGTTGTC	60.762	63.158	53	TTCCGGTGTTCCTGAGCTG	60.383	57.895	377	111	(AAC)^6	129	Trinucleotide
HN7TS9H02EO2WA	CAAGTGGCATACAAACGTGC	59.045	50	19	TCCCTTTGTCCATCCCGAC	59.776	57.895	366	171	(GAT)^7	192	Trinucleotide
HN7TS9H02EO9CK	GAAGGACTGGCCACAAGGG	61.064	63.158	208	ATACTGGAGTCGGGTTGCC	59.854	57.895	626	266	(GCT)^6	284	Trinucleotide
HN7TS9H02EOWTP	GTAGGGCGGTGACTTGGAC	60.826	63.158	79	CATGGCTGGCTGGGAAATG	59.932	57.895	259	152	(AAC)^6	170	Trinucleotide
HN7TS9H02EOXWB	GGCCTGGAGGAAGGTTGTC	60.762	63.158	232	GAGCTGAGGGAGGGTATGC	60.006	63.158	413	290	(AAC)^6	308	Trinucleotide
HN7TS9H02EPI2X	TGCCTTCTCTCCAAGGCTG	60.081	57.895	161	GTGACTTGGATCGGCCAAC	59.568	57.895	586	513	(GAT)^6	531	Trinucleotide
HN7TS9H02EQ1II	GGAACAGGTTATGGCTCAGG	58.714	55	55	CGGGCAGTGAAGAAAGCTG	59.864	57.895	496	91	(GCT)^6	109	Trinucleotide
HN7TS9H02EQSVJ	AGCCTGAAGTGCCTGATCC	60.157	57.895	159	GGCCAATGGTGAAGTGGAC	59.483	57.895	476	248	(AAC)^6	266	Trinucleotide
HN7TS9H02ER0O0	TCCGCTGGATGTAAGCAGG	60.233	57.895	118	GCTAAGACGTTAAACTGAAACATGG	59.678	40	481	399	(AAC)^7	420	Trinucleotide
HN7TS9H02ERB5G	TCTGGAGCATGTCAGACCG	59.858	57.895	137	TCCAGCTACTCACCAAGAGC	59.864	55	472	378	(ATT)^15	423	Trinucleotide
HN7TS9H02ERSZB	GCATTCTCGGTTACCACAGG	59.376	55	5	GCAAAGCCAGTCCGCATAG	60.012	57.895	210	101	(CGG)^11	134	Trinucleotide
HN7TS9H02ESEJC	TGTGCATGGTTTGCTCCAC	59.709	52.632	412	GGGCCTGGAGGGATGTTG	60.485	66.667	567	494	(GTT)^6	512	Trinucleotide
HN7TS9H02ESSNC	TCAGCTCCCAGCTATATCACC	59.521	52.381	184	GGTTAAGGCCTCTGGACCG	60.533	63.158	567	402	(AGG)^7	423	Trinucleotide
HN7TS9H02ESY2H	CAACAAGCTCTGGGCAGTC	59.491	57.895	108	AGTTTAAGGGCTGCGGAAC	58.807	52.632	532	486	(ATC)^6	504	Trinucleotide
HN7TS9H02ESYB7	GGCAAGACTCACTGGAAAGG	59.225	55	49	GCGGCGTTGTTCAAGACTG	60.805	57.895	476	99	(AGG)^6	117	Trinucleotide
HN7TS9H02ETE62	GGATCCTGGAAGTGTTTGGC	59.579	55	30	GCTGGAGATTGGACATGGG	58.647	57.895	421	201	(AAC)^10	231	Trinucleotide
HN7TS9H02ETJ6E	AGTTGGTGTGGGCTTAGGG	60.003	57.895	326	CAGGGACCAGTGGCATTTC	59.18	57.895	484	431	(AAC)^6	449	Trinucleotide
HN7TS9H02ETU5M	TGGCAGATTTCCACCTTGC	59.099	52.632	9	AGCTCAAGACCTGTGGAGG	59.394	57.895	400	153	(ATC)^8	177	Trinucleotide
HN7TS9H02EUI9K	TGTGGAGGTAAGCAGTTGAG	57.918	50	17	ATTCCAGCTTTGGTCAGCG	59.187	52.632	344	59	(ACT)^6	77	Trinucleotide
HN7TS9H02EVCQL	GCCTCCTCAGCAGTCCC	59.752	70.588	29	GCAGTGCCCGGTAAATGTC	59.937	57.895	298	67	(AGG)^6	85	Trinucleotide
HN7TS9H02EVFP7	GTCGCTAAGGCAGTTGGTG	59.572	57.895	261	CTGGAGAACTCCTGCAAGC	58.892	57.895	643	377	(AAC)^6	395	Trinucleotide
HN7TS9H02EVNX0	TGTCCTGGTCACCTCAATC	57.106	52.632	82	AGGCCTCACTGAATGCTCC	60.157	57.895	431	143	(AGG)^6	161	Trinucleotide
HN7TS9H02EW5ZN	AGCTCCAAAGCAGTCAGGG	60.385	57.895	164	GCTCTTCCTGCCAAATGATACC	60.142	50	493	431	(GTT)^7	452	Trinucleotide
HN7TS9H02EWK7Y	ACACATCAGGGAAAGTAGCC	57.974	50	7	GGCCTGGAGGAAGGTTGTC	60.762	63.158	164	91	(GTT)^6	109	Trinucleotide
HN7TS9H02EWOOU	TGGGTACATGACCGACACTATG	60.338	50	35	GGTCGCAATGGGTTGGATG	59.935	57.895	213	165	(GTT)^6	183	Trinucleotide
HN7TS9H02EWORO	AGAGAGCTTGGCTATGGGC	59.929	57.895	174	GTGTGCCAAGGAAAGGCTG	60.083	57.895	421	211	(AAC)^8	235	Trinucleotide
HN7TS9H02EWXY5	TTGTTCCACCCACTGTTGC	59.254	52.632	220	ACATGTCCAGAGAGCTGCC	60.157	57.895	535	339	(GTT)^6	357	Trinucleotide
HN7TS9H02EX0IZ	TGGCTGAATGTGGACTTGC	59.106	52.632	328	TCAAATGTGAGCCTCCCTG	57.795	52.632	478	383	(ATT)^12	419	Trinucleotide
HN7TS9H02EXJ71	AAAGCTGAGTCTCCCAGGC	60.081	57.895	223	GACGTGCCTGTCAATGCTG	60.231	57.895	469	254	(GCT)^6	272	Trinucleotide
HN7TS9H02EXQ4A	AAAGACGCAAGCGGAGAAC	59.499	52.632	184	CCTGGCATCCAGCTTGAAC	59.561	57.895	524	229	(CCT)^6	247	Trinucleotide
HN7TS9H03F0TLK	ACTGTGCAGTGGGCATTTC	59.407	52.632	298	AGCTGGGTGGGAGCTATTC	59.543	57.895	544	442	(GTT)^7	463	Trinucleotide
HN7TS9H03F1E9L	ACCCTGAAGGTGTGATCTCC	59.493	55	115	CTTATATGTTATCAGAAGCCTGCC	58.031	41.667	398	317	(AAC)^6	335	Trinucleotide
HN7TS9H03F1U20	ACTCATTGCAGACTGTTCAGG	58.984	47.619	1	ACCATCAGGGTGGCTCTTG	60.08	57.895	287	41	(AGG)^10	71	Trinucleotide
HN7TS9H03F2KQX	CTTGAGTGCAGAAGGTGCC	59.491	57.895	114	CCCATTGAGGCAGCTGAAC	59.561	57.895	466	286	(GAT)^6	304	Trinucleotide
HN7TS9H03F3PZO	AGAAGGGAGAAGCAAGCCC	60.08	57.895	115	TGTGCAGTTTAATGTCATCCTG	57.726	40.909	509	347	(ATC)^7	368	Trinucleotide
HN7TS9H03F3X3R	GAGTCACTGAAGCGGTTGG	59.202	57.895	17	GGAGACGAGTGGATCCTGC	60.306	63.158	330	137	(AAC)^6	155	Trinucleotide
HN7TS9H03F4R0B	ACTCCTGCGAATCCCTTGG	60.157	57.895	112	AGCTGGTGGCATCTACACC	60.157	57.895	524	445	(AAC)^7	466	Trinucleotide
HN7TS9H03F698F	AATGAGCTGCCTTGGGCTC	61.142	57.895	154	GCCCACTCTGACCTACCAG	59.856	63.158	357	194	(GAT)^7	215	Trinucleotide
HN7TS9H03F6LJP	GGGTCACAATGGGCCAGAC	61.438	63.158	19	TCCTCTACTTGAAGGGCTCG	59.286	55	283	54	(AAC)^6	72	Trinucleotide
HN7TS9H03F7IP9	GCCAAATACAGCCCTGTCG	59.641	57.895	13	TAAGGGAGTTGGTGCAGGC	60.385	57.895	375	247	(GTT)^6	265	Trinucleotide
HN7TS9H03F7NAT	GCTATGCCTCCCAATTGACC	59.435	55	33	ATACGGCTGCGTAGATGCC	60.749	57.895	327	171	(AGC)^7	192	Trinucleotide
HN7TS9H03F97KW	GACAGCTTCAGCTATGAGATGG	59.365	50	91	TGCTGCCGAATCATTGACG	59.645	52.632	318	129	(GAT)^6	147	Trinucleotide
HN7TS9H03F99MM	CACTAAGGCAGTTGGCGTG	59.865	57.895	115	GTACTGGTGGAGGGCGAAC	60.826	63.158	429	229	(AAC)^6	247	Trinucleotide
HN7TS9H03F9CP6	GGTGGAAAGAACAAGCTGCC	60.435	55	29	AAGCCTCCTGTGCGATGG	60.48	61.111	285	220	(ATT)^11	253	Trinucleotide
HN7TS9H03FJN02	CACAGATGGTGGCTTCGC	59.548	61.111	102	GAGCAGAACAACTGGAGGC	59.193	57.895	548	144	(AAT)^14	186	Trinucleotide
HN7TS9H03FJUPN	GGGCCAATAAGGCCACCAG	61.522	63.158	131	TGGTCACACAGAGGAAGGC	60.006	57.895	413	210	(GTT)^6	228	Trinucleotide
HN7TS9H03FKAB1	GGCAAGACTCACTGGAAAGG	59.225	55	49	GCTGCTGCTTACACAAGAGG	59.942	55	460	99	(AGG)^6	117	Trinucleotide
HN7TS9H03FKWMP	GGGCTCTTGTGCGATGG	58.778	64.706	73	CCAATTGCGGACGTACCAG	59.646	57.895	398	111	(AAT)^12	147	Trinucleotide
HN7TS9H03FMNN5	GTTGTATCCGACCCATCGC	59.132	57.895	206	GAGAGCTGCAACTATGAGGC	59.164	55	476	405	(GCT)^9	432	Trinucleotide
HN7TS9H03FMUU9	TACCAGAGACTGCTTGCCC	59.778	57.895	183	CCTTGCCTATTTCCATCAGCC	59.804	52.381	495	433	(GAT)^8	457	Trinucleotide
HN7TS9H03FMZ2H	TGTGAACTTCTTTGAGCCCTG	59.187	47.619	148	CTTCCTCAGTCCTGCTATGC	58.513	55	506	347	(GTT)^6	365	Trinucleotide
HN7TS9H03FN6Q4	ACTATTTCCAATTCTTCCCAGCC	59.499	43.478	13	GACGTGGTCACACTGAAGG	58.835	57.895	295	166	(AAT)^14	208	Trinucleotide
HN7TS9H03FNBLP	TCGTGGTTGTCCCAGAGC	60.006	61.111	79	GGAGACCACTCTGCAGGAC	60.158	63.158	430	115	(GCT)^6	133	Trinucleotide
HN7TS9H03FNN5L	GGGTACCGTAGGATCACCG	59.711	63.158	8	GGGTGGTGCTGGAAACTTG	59.709	57.895	283	55	(AAC)^6	73	Trinucleotide
HN7TS9H03FO6WU	AGGGCTTTGGCTATTTAACCC	59.029	47.619	83	AGATGTCTTCTTCCAAGGGC	57.968	50	243	124	(AGG)^6	142	Trinucleotide
HN7TS9H03FP3EH	TGTTACCTTTACTGATGCATGG	57.181	40.909	45	GGTCTGATCTTCAACCCAAAG	57.275	47.619	216	77	(CTT)^6	95	Trinucleotide
HN7TS9H03FPEH4	GGGCCTGGAGGACTGTTG	60.403	66.667	65	ACGTACGAGCTGAAGCCTG	60.526	57.895	275	123	(AAC)^6	141	Trinucleotide
HN7TS9H03FPGKK	AGCCTCACCTTCTCTGGTG	59.394	57.895	123	AACAATCCACCAGGCCTCC	60.387	57.895	378	173	(AAC)^6	191	Trinucleotide
HN7TS9H03FQDT8	CAAATACTGCAGGGATGGGC	59.722	55	26	ACTTCCTAATGGTGTATTCTTGTCC	59.367	40	403	288	(AAC)^6	306	Trinucleotide
HN7TS9H03FQTUT	TGTGTCTCTCATCTCAACATTTGG	59.772	41.667	10	GTAGACATGGCTGGGCATC	58.735	57.895	412	71	(CCT)^6	89	Trinucleotide
HN7TS9H03FS0UP	TGTGACATTGTGCAAGAGGC	59.797	50	135	CGGAAGCTACAGCTGAGGG	60.603	63.158	397	321	(ATT)^12	357	Trinucleotide
HN7TS9H03FSESY	ACGGTACCTCCCATTTCACC	60.151	55	2	CAGTGGAGAAAGCTGCCAAG	59.869	55	331	131	(GGT)^6	149	Trinucleotide
HN7TS9H03FT562	GCTGCTTGGCCACCTTTAG	59.86	57.895	113	AGTGACTGGGTTTGTGCAAC	59.652	50	372	316	(GCT)^8	340	Trinucleotide
HN7TS9H03FUVEK	TCATCTGAGAAAGTGTTCCAACG	59.703	43.478	37	AATGCTGGATCCTAAGATTTGC	57.568	40.909	188	92	(ACC)^8	116	Trinucleotide
HN7TS9H03FV7L8	TCCAGCCCTCTGGTTTCAG	59.698	57.895	315	CTGAGGAACAGCCAACTGC	59.491	57.895	467	418	(GAT)^6	436	Trinucleotide
HN7TS9H03FVL8K	TCCTCTCACGCCAAAGTCC	60.082	57.895	64	GTTAACAACCTGGCGGCTC	59.864	57.895	373	105	(GCT)^7	126	Trinucleotide
HN7TS9H03FWA8N	AACACTCCTCCAGGCCTTC	59.697	57.895	121	ACACTATGTGTCTTATCTTGCATCC	59.723	40	521	440	(GGT)^7	461	Trinucleotide
HN7TS9H03FWSBU	TGACTGTTGCAAACTGCCC	59.634	52.632	41	TTCAGTGTGGAGGGACACG	60.007	57.895	287	94	(AAC)^6	112	Trinucleotide
HN7TS9H03FX3P2	CAAGCAGGTGCTCTTCCAG	59.191	57.895	104	GCCTTTCCTGATCAACCAGC	59.939	55	520	353	(ATC)^8	377	Trinucleotide
HN7TS9H03FXU7K	TCTTCTGCCACAGGGCATC	60.46	57.895	5	ATCAGTGCTGGAGCAGACC	60.157	57.895	443	51	(AGG)^6	69	Trinucleotide
HN7TS9H03FYCCE	ATGGGCCCTTCGGAAACTC	60.462	57.895	39	CACGGAAAGGTGCAACTGG	60.084	57.895	383	109	(AGG)^6	127	Trinucleotide
HN7TS9H03FYWEE	AGCCATCCTGGGTTTCTTAC	57.96	50	36	AGGTCTGACTCTGCATGGG	59.47	57.895	299	93	(GAT)^7	114	Trinucleotide
HN7TS9H03G0IMX	AGCCTCAGCATTGAATTTGTAAG	58.444	39.13	90	GCTCCTTCCCTGAGGTGTC	60.157	63.158	406	176	(AAC)^7	197	Trinucleotide
HN7TS9H03G0PBL	TGGGTACATGACCGACACTATG	60.338	50	36	GGTCGCAATGGGTTGGATG	59.935	57.895	215	167	(GTT)^6	185	Trinucleotide
HN7TS9H03G204U	GGGTGGAGCTGAGTCCTTG	60.459	63.158	77	GTGCGACGGGAATGTGAAG	59.941	57.895	495	200	(GCT)^6	218	Trinucleotide
HN7TS9H03G2L56	TCCGCTTATCGTTTCAATGGC	60.08	47.619	106	TGACATCTGTTGGCGCTTC	59.197	52.632	273	208	(AAC)^8	232	Trinucleotide
HN7TS9H03G2ULV	GGTCGCAATGGGTCGAATG	60.012	57.895	55	TCTGCAGCAAACCTGGGAG	60.687	57.895	311	88	(AAC)^6	106	Trinucleotide
HN7TS9H03G2V9T	TCCAGCCCTCTGGTTTCAG	59.698	57.895	315	CTGAGGAACAGCCAACTGC	59.491	57.895	467	418	(GAT)^6	436	Trinucleotide
HN7TS9H03G3SI4	GGTCAGACTAGATGGCCCG	60.008	63.158	151	GGACTCCGGGTGATGACAG	60.232	63.158	355	251	(GTT)^7	272	Trinucleotide
HN7TS9H03G3UMN	GCCTTCAATATCGGCAGAAGG	59.877	52.381	29	GCCTGGAGGAGTGTTGTCC	60.758	63.158	258	187	(GTT)^6	205	Trinucleotide
HN7TS9H03G3UMQ	CCAAGGCTGAGATTCAAGGG	59	55	100	GGCTTGAGTGGACTTTGGC	59.786	57.895	355	235	(GTT)^8	259	Trinucleotide
HN7TS9H03G4KZG	ACTTTCTCTACAGTCTATTATTCCACC	59.089	37.037	10	GCAATGTGCACCCAGAACC	60.454	57.895	380	51	(ATC)^11	84	Trinucleotide
HN7TS9H03G56CC	GGGAAGAGGGACTCCTTGG	59.466	63.158	168	GACCCTTTGGGCAATACCAC	59.577	55	447	377	(AAC)^6	395	Trinucleotide
HN7TS9H03G5FRJ	TCTCATCAGTACCTGTAGTTTACTC	58.148	40	45	CCCACCCATTCAGCTTGAC	59.18	57.895	312	102	(GTT)^7	123	Trinucleotide
HN7TS9H03G6DC3	AAGAGCCATGTGCAAGGAC	58.801	52.632	256	CACTGAGCAGGTAGGCAATAG	58.924	52.381	481	426	(GAT)^6	444	Trinucleotide
HN7TS9H03G6E33	CCTTGGCCAGAATTGCTCC	59.556	57.895	69	GAGAGACCGCTGAGCCC	59.842	70.588	419	295	(CCT)^7	316	Trinucleotide
HN7TS9H03G6P5Y	CCATGCCCATCTGTGAAAGC	60.294	55	226	TGGGTTCTTTGCAAGTGGAAG	59.734	47.619	511	431	(GGT)^8	455	Trinucleotide
HN7TS9H03G6SQ6	GGGACCCTTTGGATTATGGC	59.062	55	117	CCATGGCTACAGAGATGTTTGC	60.401	50	318	203	(AAT)^7	224	Trinucleotide
HN7TS9H03G70YK	GTCGCAATGGGTCGGATG	59.318	61.111	13	AGAAACGCCTGGACCTCTG	60.082	57.895	368	45	(AAC)^6	63	Trinucleotide
HN7TS9H03G8FAU	AGAACATCTGGAGGGCACC	59.774	57.895	108	TGGTTGGAGCAGTCCTCTG	59.701	57.895	307	171	(CCT)^6	189	Trinucleotide
HN7TS9H03G8IJE	CAAACCCTGTGCCAGTCAG	59.412	57.895	64	CTGTCCACAGAGTCTTACGC	58.754	55	486	377	(ACT)^6	395	Trinucleotide
HN7TS9H03G9CWR	GAGGTGACCCATCATGCAG	58.658	57.895	47	TCCATATACAGAGGGCTGGC	59.42	55	202	103	(GTT)^6	121	Trinucleotide
HN7TS9H03GAWO7	TCACCCTCATGCTAAGCCC	59.851	57.895	176	AAAGCTAGGACAGGGCCAC	60.081	57.895	466	323	(AGC)^6	341	Trinucleotide
HN7TS9H03GB6HJ	ACGGTGGCATCAAGGGTAG	60.157	57.895	182	GCAGTGTCTTCTCACCACG	59.209	57.895	429	371	(AGG)^6	389	Trinucleotide
HN7TS9H03GC4XV	GAGGCTGTAGGACACAGGG	59.856	63.158	316	TGAGCAGCATGGTCTAAGGG	60.224	55	624	456	(CCT)^6	474	Trinucleotide
HN7TS9H03GD9CZ	GCTGGGCTCGAATCCTTAAC	59.446	55	58	AAGTGAGGCAGATGGGCTC	60.157	57.895	420	339	(GAT)^6	357	Trinucleotide
HN7TS9H03GDEEP	GGTCGCAATGGGTTGGATG	59.935	57.895	154	GAGCAGCTTCAATGGTGGC	60.232	57.895	422	188	(AAC)^6	206	Trinucleotide
HN7TS9H03GDWI9	CACCAGTGCAAAGCACCTC	60.084	57.895	128	AGCCATGCTCAGGCAAATG	59.555	52.632	364	298	(GCT)^6	316	Trinucleotide
HN7TS9H03GEEH4	CCAGGAGGAACCTTCAGAATTAG	58.998	47.826	1	TGCAGGCACATTCAGGAAC	59.106	52.632	394	62	(ATC)^12	98	Trinucleotide
HN7TS9H03GEZ8C	GGAGCAGAATGGGCTTGTC	59.261	57.895	192	GCCTGGAGGAGTGTTGTCC	60.758	63.158	408	337	(GTT)^6	355	Trinucleotide
HN7TS9H03GF3K5	GCATGTCCAGCACAAGACC	59.862	57.895	123	TCATGGACTGGAAGAGCGG	59.856	57.895	331	184	(GAT)^6	202	Trinucleotide
HN7TS9H03GFSUN	CCACCACAACTTTGCCAGC	60.676	57.895	175	GGTCGCAGTGGGTCAGATG	61.193	63.158	438	389	(GTT)^6	407	Trinucleotide
HN7TS9H03GG937	GACGGGAACATCAATGGGC	59.638	57.895	81	ATCGTCTGCATGAACGCTG	59.355	52.632	239	127	(ATC)^6	145	Trinucleotide
HN7TS9H03GGI6P	ACTGTAGTCTGCCTGCCAC	60.082	57.895	213	ACTTGTTAAACCACTCAGGCTC	59.289	45.455	440	292	(AAC)^6	310	Trinucleotide
HN7TS9H03GHDM6	AACCCTGACTGCTCCTTGG	60.004	57.895	205	CGCACAGAAGATGAACTGCC	60.292	55	579	480	(AAC)^6	498	Trinucleotide
HN7TS9H03GHDUO	TGTGAACTTCTTTGAGCCCTG	59.187	47.619	149	CTTCCTCAGTCCTGCTATGC	58.513	55	506	348	(GTT)^6	366	Trinucleotide
HN7TS9H03GHH7O	TGTCCATGAGGTCGCGATG	60.602	57.895	155	TGAATGGTGTGTTGCATTCC	57.647	45	329	197	(AAC)^6	215	Trinucleotide
HN7TS9H03GHRUT	GCAGGCTCAACAAGAAGCC	60.158	57.895	37	TCTGGAATGCTTGCAGTGG	58.802	52.632	474	215	(AGC)^6	233	Trinucleotide
HN7TS9H03GHXOP	GGACCTGGAGGAAGGTTGTC	60.44	60	183	TCCCGAGGTCAGTTTCCAG	59.398	57.895	332	242	(AAC)^7	263	Trinucleotide
HN7TS9H03GI0RU	GGGACAAGAAAGGGTCAGC	58.803	57.895	56	GGGTTAAGTGCACACGAGG	59.198	57.895	431	164	(GTT)^6	182	Trinucleotide
HN7TS9H03GJEM1	TCTGTCTTCTGCCACAGGG	59.701	57.895	1	AGGAGACATTGGGAAGCGG	60.157	57.895	358	51	(AGG)^6	69	Trinucleotide
HN7TS9H03GJNEA	GGCCTGGAGGAAGGTTGTC	60.762	63.158	142	CCAGCTATGTAACAGGCAGAAATC	60.492	45.833	304	200	(AAC)^6	218	Trinucleotide
HN7TS9H03GKOUV	GTTTCTGCCAGGAGTTGCC	59.786	57.895	25	TTTCCAACCCATTGCGACC	59.406	52.632	399	200	(ATC)^6	218	Trinucleotide
HN7TS9H03GL9EK	TAGCATTTCTTGGGCAGGC	58.87	52.632	186	GTGCATGGAGGGTCCCAG	60.482	66.667	339	270	(AGG)^6	288	Trinucleotide
HN7TS9H03GLAEE	TGTCTGCGTGGTTGTTCAC	59.348	52.632	155	ACCACCGTACTGATTGGGC	60.459	57.895	528	363	(AGG)^6	381	Trinucleotide
HN7TS9H03GLMM6	TGCACCTTATTTAATGGCTCC	57.037	42.857	319	TCTTTACACATATCTACTCCTTGGC	58.961	40	523	468	(ATC)^6	486	Trinucleotide
HN7TS9H03GN12D	AAATGGTGACCCTGTGCCC	60.999	57.895	243	GGGAAAGACCACTGAATTGCC	60.215	52.381	469	403	(AGG)^6	421	Trinucleotide
HN7TS9H03GO5FZ	CACACACCTGTCGCAGTTC	59.795	57.895	74	AACCCTGACTGCTCCTTGG	60.004	57.895	410	122	(GTT)^6	140	Trinucleotide
HN7TS9H03GPCAZ	ATCATTGTTGTAAGCTGCCC	57.131	45	49	GGGCCACAATAGCAAGCTG	59.934	57.895	386	110	(AAT)^16	158	Trinucleotide
HN7TS9H03GPWQR	GCCTTCAATATCGGCAGAAGG	59.877	52.381	29	GCCTGGAGGAGTGTTGTCC	60.758	63.158	258	187	(GTT)^6	205	Trinucleotide
HN7TS9H03GQ31K	ACTGGAGTGTCCGAACAGG	59.705	57.895	12	GTGGCCTTCTTCATGAGCG	59.643	57.895	207	43	(AGC)^6	61	Trinucleotide
HN7TS9H03GRTEV	GTCGAGGGCTAGAAGCTGG	60.306	63.158	73	GCCTGGAGGAGTGTTGTCC	60.758	63.158	226	155	(GTT)^6	173	Trinucleotide
HN7TS9H03GT1TW	GTCACAATGGGTCGGATGC	59.641	57.895	72	GCCCTGAGTCCCAGTTCAG	60.459	63.158	299	104	(AAC)^6	122	Trinucleotide
HN7TS9H03GT54A	ACCTGGAGGAAGGTTGTCC	59.308	57.895	7	ACTTGGTATTTGCCTTGGCTG	59.871	47.619	360	64	(AAC)^7	85	Trinucleotide
HN7TS9H03GTGCA	TGCCATCTCACAGCAGAGG	60.157	57.895	240	GCCTGGAGGAGTGTTGTCC	60.758	63.158	526	452	(GTT)^7	473	Trinucleotide
HN7TS9H03GUPT1	GCTTGAGTGAACTCTGGCTG	59.589	55	32	AGGACTTTCCCGTGTGCTC	60.383	57.895	414	126	(AAC)^6	144	Trinucleotide
HN7TS9H03GW15Y	CTTCCCAGGCTAAAGTGCC	58.878	57.895	320	TCACTCACTGATGTAATCGGG	57.957	47.619	572	443	(GAT)^7	464	Trinucleotide
HN7TS9H03GWNEK	AAACCCAGCAGGTCATCCC	60.387	57.895	24	GCTGACAAACAGGCACTGG	60.084	57.895	250	184	(AGG)^8	208	Trinucleotide
HN7TS9H03GWQUI	ACACCCTGGATTGGAGAACC	60.078	55	129	GGTGCTGGAGGAGACTTGG	60.459	63.158	575	227	(GTT)^6	245	Trinucleotide
HN7TS9H03GX56J	TCACTGGTGTGGAGGGAAC	59.623	57.895	281	GCCTGGAGGAGTGTTGTCC	60.758	63.158	494	420	(GTT)^7	441	Trinucleotide
HN7TS9H03GXCV3	CCACCAGCAGACTATGGGC	60.909	63.158	302	GCTCAGCTTTGTGGCAGTC	60.158	57.895	530	466	(AGG)^6	484	Trinucleotide
HN7TS9H03GXQBO	CCCTTTGGATTATGGCTGGG	59.06	55	120	GAGGACCTATGGGATCTGCC	59.788	60	451	202	(AAT)^7	223	Trinucleotide
HN7TS9H03GY2NK	TAGTGGTAGCCAACGGTGC	60.457	57.895	213	TGTCAAGCCCAGGAACCAG	60.31	57.895	481	354	(GTT)^6	372	Trinucleotide
HN7TS9H03GY5IC	AGTGAAGAGAACCCATGGAC	57.604	50	4	TCAGAGCTTACTTTCCAGAGC	58.158	47.619	327	248	(GAT)^8	272	Trinucleotide
HN7TS9H03GY8V0	TGTGCCAGCAGCTATTCTG	58.584	52.632	171	CGGTGGAGTTCGTACACTTTC	59.683	52.381	524	262	(GAT)^11	295	Trinucleotide
HN7TS9H03GZDNG	TTTGCAACACCCGCCAAAG	60.603	52.632	132	CAGAAGCCAATGCGTGGTC	60.231	57.895	521	422	(AGC)^7	443	Trinucleotide
HN7TS9H03GZKD2	GCCTTCAATATCGGCAGAAGG	59.877	52.381	29	GCCTGGAGGAGTGTTGTCC	60.758	63.158	258	187	(GTT)^6	205	Trinucleotide
HN7TS9H03HA3NZ	CCCGGCTCAGTATATCAGGG	59.864	60	15	CTTCATCCTGTGCCCGTTTC	59.941	55	429	294	(GGT)^9	321	Trinucleotide
HN7TS9H03HB2OE	GCGTCCAGTGATGAGGTAAG	58.815	55	58	CTATGGGCAGGAAGGTCCC	59.927	63.158	403	116	(GGT)^6	134	Trinucleotide
HN7TS9H03HB68R	AGTCACTGAAGCAGTCGGG	60.083	57.895	318	GCAGCCTAATAGCCACAGC	59.417	57.895	499	435	(AAC)^8	459	Trinucleotide
HN7TS9H03HBQ60	GGGTACCGTAGGATCACCG	59.711	63.158	8	GGGTGGTGCTGGAAACTTG	59.709	57.895	283	55	(AAC)^6	73	Trinucleotide
HN7TS9H03HBWDS	AGGGCTTTGGCTATTTAACCC	59.029	47.619	83	AGATGTCTTCTTCCAAGGGC	57.968	50	243	124	(AGG)^6	142	Trinucleotide
HN7TS9H03HCDFM	GCAGCCAATCTATGTGGTCAG	59.808	52.381	42	GGTGGCATCATGTCTCAGG	58.658	57.895	254	96	(AGG)^14	138	Trinucleotide
HN7TS9H03HDVBH	CAAGCAGGTGCTCTTCCAG	59.191	57.895	102	CCTGATCAACCAGCCACAG	58.885	57.895	512	350	(ATC)^8	374	Trinucleotide
HN7TS9H03HEDO8	CAGTGGTGGTAACAGCTTGG	59.513	55	6	GTGCTTGGAACCCTGCAAC	60.38	57.895	365	143	(GAT)^6	161	Trinucleotide
HN7TS9H03HFIW0	GGTCGCAATGGGTCGAATG	60.012	57.895	55	TCTGCAGCAAACCTGGGAG	60.687	57.895	311	88	(AAC)^6	106	Trinucleotide
HN7TS9H03HFQN6	TCAGTGGCTTGGTCCTTCC	60.004	57.895	62	ACTGTATCAGCCAAGGGCG	60.533	57.895	448	132	(GTT)^6	150	Trinucleotide
